# Supplementary material for: Sex-specific temporal trends in ambulatory heart failure incidence, mortality and hospitalisation in Ontario, Canada from 1994 to 2013: a population-based cohort study
Source: PubMed Central journal article supplement — BMJ Open. 2020 Nov 26;10(11):e044126. doi: 10.1136/bmjopen-2020-044126 (PMC7692840; doi:10.1136/bmjopen-2020-044126), 2020-11-26
Supplement: bmjopen-2020-044126.draft_revisions.pdf [file bmjopen-2020-044126.draft_revisions.pdf]

# BMJ Open

BMJ Open is committed to open peer review. As part of this commitment we make the peer review history of every article we publish publicly available.

When an article is published we post the peer reviewers' comments and the authors' responses online. We also post the versions of the paper that were used during peer review. These are the versions that the peer review comments apply to.

The versions of the paper that follow are the versions that were submitted during the peer review process. They are not the versions of record or the final published versions. They should not be cited or distributed as the published version of this manuscript.

BMJ Open is an open access journal and the full, final, typeset and author-corrected version of record of the manuscript is available on our site with no access controls, subscription charges or pay-per-view fees (<http://bmjopen.bmj.com>).

If you have any questions on BMJ Open's open peer review process please email [info.bmjopen@bmj.com](mailto:info.bmjopen@bmj.com)

# BMJ Open

## Sex-Specific Temporal Trends in Ambulatory Heart Failure Incidence, Mortality and Hospitalization in Ontario, Canada from 1994-2013

|                               |                                                                                                                                                                                                                                                                                                                                                                                                                                                                                                                                                                                                                                                                                                                                                                  |
|-------------------------------|------------------------------------------------------------------------------------------------------------------------------------------------------------------------------------------------------------------------------------------------------------------------------------------------------------------------------------------------------------------------------------------------------------------------------------------------------------------------------------------------------------------------------------------------------------------------------------------------------------------------------------------------------------------------------------------------------------------------------------------------------------------|
| Journal:                      | <i>BMJ Open</i>                                                                                                                                                                                                                                                                                                                                                                                                                                                                                                                                                                                                                                                                                                                                                  |
| Manuscript ID                 | bmjopen-2020-044126                                                                                                                                                                                                                                                                                                                                                                                                                                                                                                                                                                                                                                                                                                                                              |
| Article Type:                 | Original research                                                                                                                                                                                                                                                                                                                                                                                                                                                                                                                                                                                                                                                                                                                                                |
| Date Submitted by the Author: | 24-Aug-2020                                                                                                                                                                                                                                                                                                                                                                                                                                                                                                                                                                                                                                                                                                                                                      |
| Complete List of Authors:     | Sun, Louise; University of Ottawa Heart Institute, Division of Cardiac Anesthesiology; Institute for Clinical Evaluative Sciences, Mielniczuk, Lisa; University of Ottawa Heart Institute<br>Liu, Peter; University of Ottawa Heart Institute, Division of Cardiology<br>Beanlands, Rob; University of Ottawa Heart Institute, Division of Cardiology<br>Chih, Sharon; University of Ottawa Heart Institute, Division of Cardiology<br>Davies, Ross; University of Ottawa Heart Institute, Division of Cardiology<br>Coutinho, Thais; University of Ottawa Heart Institute<br>Lee, Douglas; University of Toronto, Medicine<br>Austin, Peter; University of Toronto<br>Bader Eddeen, Anan; Institute for Clinical Evaluative Sciences,<br>Tu, Jack; ICES Toronto |
| Keywords:                     | Cardiac Epidemiology < CARDIOLOGY, Heart failure < CARDIOLOGY, EPIDEMIOLOGY                                                                                                                                                                                                                                                                                                                                                                                                                                                                                                                                                                                                                                                                                      |
|                               |                                                                                                                                                                                                                                                                                                                                                                                                                                                                                                                                                                                                                                                                                                                                                                  |

SCHOLARONE™  
Manuscripts

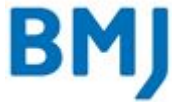

I, the Submitting Author has the right to grant and does grant on behalf of all authors of the Work (as defined in the below author licence), an exclusive licence and/or a non-exclusive licence for contributions from authors who are: i) UK Crown employees; ii) where BMJ has agreed a CC-BY licence shall apply, and/or iii) in accordance with the terms applicable for US Federal Government officers or employees acting as part of their official duties; on a worldwide, perpetual, irrevocable, royalty-free basis to BMJ Publishing Group Ltd ("BMJ") its licensees and where the relevant Journal is co-owned by BMJ to the co-owners of the Journal, to publish the Work in this journal and any other BMJ products and to exploit all rights, as set out in our [licence](#).

The Submitting Author accepts and understands that any supply made under these terms is made by BMJ to the Submitting Author unless you are acting as an employee on behalf of your employer or a postgraduate student of an affiliated institution which is paying any applicable article publishing charge ("APC") for Open Access articles. Where the Submitting Author wishes to make the Work available on an Open Access basis (and intends to pay the relevant APC), the terms of reuse of such Open Access shall be governed by a Creative Commons licence – details of these licences and which [Creative Commons](#) licence will apply to this Work are set out in our licence referred to above.

Other than as permitted in any relevant BMJ Author's Self Archiving Policies, I confirm this Work has not been accepted for publication elsewhere, is not being considered for publication elsewhere and does not duplicate material already published. I confirm all authors consent to publication of this Work and authorise the granting of this licence.

1 **Title:** Sex-Specific Temporal Trends in Ambulatory Heart Failure Incidence, Mortality and  
2 Hospitalization in Ontario, Canada from 1994-2013

3  
4 **Authors:** Louise Y. Sun\* MD SM,<sup>a,b,c</sup> Lisa M. Mielniczuk\* MD MSc,<sup>d</sup> Peter P. Liu MD,<sup>d</sup> Rob  
5 Beanlands MD,<sup>d</sup> Sharon Chih MBBS PhD,<sup>d</sup> Ross Davies MD,<sup>d</sup> Thais Coutinho MD,<sup>d,e</sup> Douglas S.  
6 Lee MD PhD,<sup>b,f</sup> Peter C. Austin PhD,<sup>b</sup> Anan Bader Eddeen MSc,<sup>b</sup> Jack V. Tu\*\* MD PhD<sup>b,g</sup>

7  
8 **Affiliations:**

9 <sup>a</sup> Division of Cardiac Anesthesiology, Department of Anesthesiology and Pain Medicine,  
10 University of Ottawa Heart Institute

11 <sup>b</sup> ICES (formerly the Institute for Clinical Evaluative Sciences)

12 <sup>c</sup> School of Epidemiology and Public Health, University of Ottawa

13 <sup>d</sup> Division of Cardiology, Department of Medicine, University of Ottawa Heart Institute

14 <sup>e</sup> Division of Prevention and Rehabilitation, University of Ottawa Heart Institute

15 <sup>f</sup> Peter Munk Cardiac Centre, University Health Network, University of Toronto

16 <sup>g</sup> Sunnybrook Schulich Heart Centre, University of Toronto

17 \* Co-primary authors

18 \*\* Dr. Tu is deceased

19

20 **Address for Correspondence:**

21 Louise Y. Sun, MD SM FRCPC FAHA

22 Clinician Scientist and Associate Professor

23 Room H2410, 40 Ruskin Street, Ottawa, ON K1Y 4W7

24 Phone: 1 613 696 7381 Email: [lsun@ottawaheart.ca](mailto:lsun@ottawaheart.ca)

**ABSTRACT**

**Objectives:** To examine the temporal trends in mortality and heart failure (HF) hospitalization in ambulatory patients following a new diagnosis of HF.

**Design:** Retrospective cohort study

**Setting:** Outpatient

**Participants:** Ontario residents who were diagnosed with HF in an outpatient setting between 1994-2013.

**Primary and Secondary Outcome Measures:** The primary outcome was all-cause mortality within one year of diagnosis and the secondary outcome was HF hospitalization within one year. Risks of mortality and hospitalization were calculated using the Kaplan-Meier method and the relative hazard of death was assessed using multivariable Cox proportional hazard models.

**Results:** A total of 352,329 patients were studied (50% female). During the study period, there was a greater decline in age standardized one-year mortality rates (AMR) in men (33%) than in women (19%). Specifically, female AMR at one-year was 104.4 (95% CI, 90.5-119.8) per 1000 in 1994 and 84.8 (75.2-95.3) in 2013, and male AMR at one-year was 123.0 (110.6-136.5) in 1994 and 83.0 (75.3-91.2) in 2013. Conversely, age standardized HF hospitalization rates declined in men (114.2 [101.0-128.5] per 1000 person-years in 1994 and 91.1 [82.3-100.7] in 2013) but remained unchanged in women (97.4 [83.3-113.3] in 1994 and 97.6 [86.0-110.3] in 2013).

**Conclusion:** Among patients with HF over a 20-year period, there was a greater improvement in the prognosis of men compared to women. Further research should focus on the determinants of this disparity and ways to reduce this gap in outcomes.

1  
2  
3 1 **Strengths and Limitations:**  
4

- 5 2 - First and largest population-based study to examine temporal, sex-specific trends in heart  
6 failure (HF) outcomes in an ambulatory setting.  
7  
8 3  
9  
10 4 - The nature of our publicly funded healthcare system allowed for analysis of all patients  
11 diagnosed with HF in Ontario without selection bias.  
12  
13 5  
14  
15 6 - Information on ejection fraction was not available in the databases used.  
16  
17 7  
18  
19 8  
20

21 9 **Key Words:** heart failure, mortality, hospitalization, women, epidemiology, prognosis  
22  
23  
24  
25  
26  
27  
28  
29  
30  
31  
32  
33  
34  
35  
36  
37  
38  
39  
40  
41  
42  
43  
44  
45  
46  
47  
48  
49  
50  
51  
52  
53  
54  
55  
56  
57  
58  
59  
60

## 1 Introduction

2 Heart failure (HF) is a significant cause of morbidity and mortality for both women and  
3 men <sup>1,2</sup>. Despite the current era of guideline directed medical therapy, HF continues to be a  
4 leading cause of admission to hospital. It is associated with a poor prognosis and contributes to  
5 35% of cardiovascular mortality in women <sup>3</sup>. Despite this, HF remains poorly understood in  
6 women, and women continue to be underrepresented in HF clinical trials <sup>4</sup>. The underlying  
7 mechanism of HF is often different in women and men, with women suffering more often from  
8 HF of a hypertensive rather than ischemic etiology <sup>5,6</sup>. Important trends in the incidence and  
9 outcomes of hospitalized HF patients have been recently published <sup>7,8</sup>; these studies suggest that  
10 the incidence of HF has declined in many inpatient cohorts, however the prognosis of this disease  
11 remains poor. An in-depth understanding of the temporal trends in HF incidence and outcomes is  
12 also needed in the ambulatory setting, where the majority of HF cases are diagnosed and  
13 managed. Also, given the sex differences in co-morbidities and outcomes in HF, it is not known  
14 if these temporal changes are modified by sex. We therefore examined the sex differences in HF  
15 co-morbidities, incidence, mortality and hospitalization in a population-based ambulatory cohort  
16 from fiscal years 1994 to 2013.

## 1 **Methods**

### 2 **Design and Study Population**

3 We conducted a population-based, retrospective cohort study of Ontario residents who  
4 were diagnosed with HF in an outpatient setting over a 20-year period, using linked  
5 administrative databases. The Research Ethics Board of Sunnybrook Health Sciences, Toronto,  
6 Canada approved this study and waived the need for informed consent.

7 Included were adult patients  $\geq 40$  years of age, who were newly diagnosed with HF in an  
8 ambulatory setting between April 1, 1994 and March 31, 2014. We excluded non-Ontario  
9 residents, those who were  $\geq 105$  years of age on the date of HF diagnosis, those who were  
10 diagnosed with HF in an inpatient setting and in whom HF had developed as a post-admission  
11 complication. Ontario is Canada's most populous and ethnically diverse province with a public  
12 funded healthcare system that reimbursed all medically necessary physician and hospital services.

### 13 **Patient and Public Involvement**

14 Patients will be invited to participate in the dissemination of our findings.

### 15 **Data Sources**

16 Databases were linked deterministically using unique encoded identifiers. Ambulatory  
17 incident HF cases were identified using the ICES Congestive Heart Failure database, based on 2  
18 outpatient billing claims for HF within one year. This algorithm was validated in primary care  
19 patient records and shown to have 85% sensitivity and 97% specificity in identifying HF events<sup>9</sup>.  
20 The Congestive Heart Failure database allowed us to study a validated cohort of HF patients with  
21 consistent entry criteria over time. Our analyses were conducted by linking the Congestive Heart  
22 Failure database with the Registered Persons Database, which contains demographic and vital  
23 statistics information, the Canadian Institute for Health Information Discharge Abstract Database,  
24 which contains data on all hospitalizations and co-morbidities, and Same Day Surgery database



1 for co-morbidities. Physician fee-for-service claims data was obtained from the Ontario Health  
2 Insurance Plan database. While lacking physiologic and laboratory measures, these databases  
3 have been validated for many outcomes, exposures, and co-morbidities <sup>10-13</sup>.

#### 4 **Outcome**

5 The primary outcome was all-cause mortality within one year of HF diagnosis. Mortality  
6 was ascertained by using the Registered Persons Database. Secondary outcome was HF  
7 hospitalization, which was ascertained using the Discharge Abstract Database.

#### 8 **Covariates**

9 Demographic variables were obtained from the Registered Persons Database. We  
10 estimated socioeconomic status based on patients' neighborhood median income in the Canadian  
11 census, and determined rural versus urban residence using Statistics Canada definitions <sup>14</sup>. We  
12 identified hypertension <sup>10</sup>, asthma <sup>15</sup>, chronic obstructive pulmonary disease (COPD) <sup>16</sup> and  
13 diabetes mellitus <sup>12</sup> using validated algorithms. Other co-morbidities were identified using  
14 Discharge Abstract Database, Same Day Surgery and Ontario Health Insurance Plan databases  
15 based on International Classification of Diseases 10<sup>th</sup> Revision codes within five years of HF  
16 diagnosis, using previously described methods <sup>17-29</sup>. Frailty was identified using the Johns  
17 Hopkins Adjusted Clinical Groups frailty-defining diagnoses indicator, which is an instrument  
18 designed and validated for research of frailty-related outcomes and resource utilization using  
19 administrative data <sup>25, 28, 30-34</sup>.

#### 20 **Statistical Analysis**

21 Analyses were stratified by sex. Continuous variables were expressed as mean (standard  
22 deviation) and categorical variables as number (proportion). Mortality was assessed at one-year  
23 post HF diagnosis. Survival time was defined as the date of HF diagnosis until date of death or  
24 last follow up. Patients were censored when they lost possession of a valid Ontario health

1 insurance number for two consecutive eligibility quarters (i.e., have left the province of Ontario).  
2 Probability of death within given durations of follow-up were calculated using the Kaplan-Meier  
3 method, with the significance of the difference between sexes assessed using the log-rank test.  
4 We estimated the cumulative incidence of HF hospitalizations using cumulative incidence  
5 functions (CIF), which treated death as a competing risk. We constructed age standardized plots  
6 of HF incidence, one-year mortality and HF hospitalization in men and women over the 20-year  
7 period. These rates were directly standardized by age using the 1991 Canadian population aged  $\geq$   
8 40 years as the reference population.

9 To examine the temporal changes in co-morbidities, we divided the 20-year period into 4  
10 temporal cohorts: those diagnosed with HF between April 1, 1994 – March 31, 1999 (the  
11 historical cohort), between April 1, 1999 – March 31, 2004, between April 1, 2004 – March 31,  
12 2009 and between April 1, 2009 – March 31, 2014 (the modern cohort). The hazard of death in  
13 the historical cohort and the modern cohort were assessed using Cox proportional hazard models  
14 with and without multivariable adjustment. To justify sex-specific analyses, we also tested for the  
15 presence of any interaction between sex and each of the mortality risk factors in these two  
16 cohorts using multiplicative interaction terms. The measure of association was hazard ratios (HR)  
17 with 95% CI. Analyses were performed using SAS 9.4 (SAS Institute, Cary, NC), with statistical  
18 significance defined by a two-sided P-value of  $< 0.05$ .

## 1 **Results**

2 Over a 20-year period in Ontario, a total of 352,329 patients were diagnosed with HF in  
3 an ambulatory setting (50% women). There were 91,583 incident HF cases in the historical  
4 cohort (52% women) and 90,707 in the modern cohort (47% women). In the modern cohort,  
5 women with HF were more likely to be older, more frail, of lower income status, have co-morbid  
6 conditions such as hypertension, hypothyroidism, anemia, dementia and depression, but were less  
7 likely to have myocardial infarction (MI), peripheral arterial disease, diabetes and alcohol abuse  
8 compared to men (Table 1). Compared to the historical cohort, modern HF patients were less  
9 likely to have peripheral and cerebral vascular disease, psychosis, paraplegia and venous  
10 thromboembolic disease; but more likely to be urban dwellers, have hypertension, atrial  
11 fibrillation, MI, valvular heart disease, pulmonary circulatory disorder, COPD/asthma, alcohol  
12 abuse, renal disease, and are increasingly frail.

### 13 **Trends in HF Incidence**

14 During the historical period (1994-1998), a total of 47,676 (0.36%) incident HF cases  
15 were identified in women and 43,907 (0.36%) in men. During the modern era (2009-2013),  
16 42,746 (0.24%) incident cases were identified in women and 47,961 (0.29%) in men. Although  
17 the incidence of HF declined in both sexes over the 20-year period, it remained higher in men  
18 than in women (Figure 1). Age standardized incidence for women decreased from 369.0 (95% CI,  
19 361.7-376.3) per 100,000 population in 1994 to 205.8 (201.4-210.3) in 2013. For men, HF  
20 incidence decreased from 480.6 (470.6-490.9) per 100,000 in 1994 to 312.8 (306.8-318.9) in  
21 2013 (eTable 1).

### 22 **Trends in Mortality**

23 One-year mortality occurred in 8,319 (17.5%) women and 8,238 (18.8%) men during the  
24 historical period; it occurred in 7,156 (16.8%) women and 7,138 (14.9%) men during the modern

1 period (eTable 2). These survival patterns are reinforced by the Kaplan-Meier survival curves in  
2 Figure 3, as well as the stacked Kaplan-Meier curves in Figure 4 that demonstrate an  
3 improvement in male survival but little change in female survival over time. Age-standardized  
4 one-year mortality rates (AMR) also declined in both sexes but the magnitude of reduction was  
5 greater in men than in women. Men had higher AMR than women at most time points prior to  
6 2009 (Figure 2). Specifically, the female AMR per 1000 was 104.4 (95% CI, 90.5-119.8) in 1994  
7 and 84.8 (75.2-95.3) in 2013, representing a 19% reduction. Conversely, male AMR per 1000  
8 was 123.0 (110.6-136.5) in 1994 and 83.0 (75.3-91.2) in 2013, representing a 33% reduction  
9 (eTable 3).

10 In the unadjusted analysis, female sex was protective against one-year mortality in the  
11 historical cohort (unadjusted HR 0.93, 95% CI 0.90-0.95) but was associated with a higher risk of  
12 mortality (unadjusted HR 1.14, 95% CI 1.10-1.18) in the modern cohort. Adjusted analysis  
13 demonstrated that the protective effect conferred by female sex had diminished over time  
14 (adjusted HR 0.85, 95% CI 0.82-0.88 in the historical and 0.97, 95% CI 0.93-1.00 in the modern  
15 cohort).

16 Table 2 lists the multivariable predictors of one-year mortality in the modern cohort.  
17 Compared to the historical cohort, the mortality risk associated with age > 75 years, liver disease,  
18 dementia and venous thromboembolism had increased while the risk associated with male sex,  
19 complicated hypertension, diabetes, renal disease and pulmonary circulatory disease had  
20 diminished. Of note, alcohol abuse and venous thromboembolism emerged as new mortality risk  
21 factors while urban residence and MI were no longer risk factors.

22 Sex-specific mortality risk factors have evolved over time. Table 3a and 3b illustrate the  
23 sex-specific HRs in the historical and modern cohorts, respectively. In the modern cohort, low  
24 income was associated with a higher risk of mortality in men but not in women. Conversely, MI

1 had a mild protective effect on men but not in women. In addition, women with peripheral  
2 arterial disease had a higher risk of death while men with COPD/asthma, dementia, primary and  
3 metastatic malignancies had a higher risk of mortality than women with similar co-morbidities.  
4 Compared to the historical cohort, most sex-specific risk factors have evolved over time, with the  
5 exception of COPD/asthma.

### 6 **Trends in HF Hospitalization**

7 HF hospitalizations occurred in 5,271 (13.4%) women and 5,169 (14.4%) men within  
8 one-year of HF diagnosis in the historical cohort. During the modern period, there were 5,420  
9 (15.6%) HF hospitalizations in women and 5,503 (13.8%) hospitalizations in men. Age-  
10 standardized HF hospitalization rates declined in men but remained unchanged in women during  
11 the 20-year period (eFigure 1 and eTable 4). Specifically, male age-standardized HF  
12 hospitalization rates were 114.2 (95% CI, 101.0-128.5) per 1000 person-years in 1994 and 91.1  
13 (82.3-100.7) in 2013. Female rates were 97.4 (83.3-113.3) in 1994 and 97.6 (86.0-110.3) in  
14 2013. The temporal trends in the cumulative incidence of HF hospitalizations are illustrated in  
15 eFigure 2.

## 1 Discussion

2 This population-based study evaluated 352,329 individuals with a first-time diagnosis of  
3 HF from 1994-2013 in the ambulatory care setting. There are four main findings reported in this  
4 study: 1) HF mortality declined over time 2) The reduction in mortality is greater in men than in  
5 women. 3) Rates of hospitalization decreased for men but remained unchanged for women. 4)  
6 The incidence and significance of co-morbidities associated with HF have changed over time,  
7 and suggest that women continue to experience a greater burden of co-morbid disease when  
8 compared to men.

### 9 **Trends in HF Incidence and Mortality**

10 Population-based temporal trends in HF incidence and mortality have been previously  
11 reported across many cohorts, however many of these studies have been limited to patients  
12 hospitalized with a diagnosis of HF or have not provided detailed, sex-stratified analyses.  
13 Temporal trends in the incidence and survival of HF patients were first reported by the  
14 Framingham group over a 50 year period from 1950-1999<sup>35</sup>. These authors reported that the  
15 incidence of HF had declined in women but not men, with improving survival in both sexes<sup>35</sup>.  
16 This pivotal study was followed by findings from a community-based cohort of 4537 patients  
17 from 1979-2000, which reported that although HF incidence remained unchanged for both sexes,  
18 mortality declined – with greater survival gains in men than women<sup>36</sup>. A recent study by our  
19 group demonstrated that amongst ambulatory Ontario residents from 2009-2013, the incidence of  
20 heart failure decreased more rapidly in men than women. At the same time, heart failure  
21 associated deaths and hospitalizations remain higher in women than men within a year of HF  
22 diagnosis<sup>19</sup>. The present study extends these findings by demonstrating a continued  
23 disproportionate decrease in HF mortality for men compared to women from 1994-2013. Our  
24 findings corroborate with our previous study of HF incidence and one-year mortality in rural and

1  
2  
3 1 urban Eastern Ontario from 1994-2013<sup>24</sup>. They also corroborate the work of Tu and colleagues<sup>7</sup>  
4  
5 2 who used similar administrative databases to report on the HF incidence and mortality of Ontario  
6  
7 3 patients  $\geq 20$  years of age from 1997-2007. Tu evaluated both admitted and ambulatory HF  
8  
9 4 patients and reported declines in HF incidence over this time period, a finding that was most  
10  
11 5 evident in the older cohorts<sup>7</sup>. Sex stratified mortality rates were not reported in this study. A  
12  
13 6 recent study from Denmark demonstrated a decrease in HF incidence over time only in cohorts  
14  
15 7  $>50$  years of age, but an increase in HF incidence in younger patients. Although detailed sex-  
16  
17 8 specific outcomes were not provided, sex-stratified models showed similar trends in incidence  
18  
19 9 and mortality over time with men having a higher incidence overall<sup>8</sup>.

20  
21  
22  
23  
24 10 The present study extends these observations by providing detailed sex-specific data on  
25  
26 11 mortality trends over time. Our findings suggest that in Ontario, one-year mortality rates have  
27  
28 12 decreased over the past 20 years. However, this mortality reduction was greatest for men, and  
29  
30 13 observed to a lesser extent for women. This translates to the observation that women had better  
31  
32 14 AMR than men in the first three temporal cohorts of this study (1994-2008); however in the most  
33  
34 15 recent cohort (2009-2013) we observed mortality to be higher in women than men for the first  
35  
36 16 time. The basis for this sex-based difference is unclear but may be explained in part by the  
37  
38 17 observation that women are more likely than men to have a diagnosis of HFpEF, a disease for  
39  
40 18 which there remains no evidence-based therapies which can improve survival, in contrast to the  
41  
42 19 significant advances in medical therapy for HF with reduced ejection fraction (HFrEF)<sup>37</sup>. In  
43  
44 20 addition, female HF patients have a higher co-morbidity burden than their male counterparts.  
45  
46 21 Complex co-morbid conditions, coupled with atypical presentation of cardiac disease in women,  
47  
48 22 may also have lead to delays in diagnosis and differences in management or response to medical  
49  
50 23 therapy<sup>38</sup>. Further work is needed to determine whether the other sex-based differences in  
51  
52  
53  
54  
55  
56  
57  
58  
59  
60

1 management, response to treatment or underlying pathophysiology remain to explain these sex-  
2 based trends in HF mortality over time.

### 3 **Trends in HF hospitalization**

4 Rates of hospitalization for HF decreased only for men in this time period. This is  
5 consistent with recent reports of sex and race differences in hospitalization trends over a similar  
6 time period<sup>19,39</sup>. It is possible that this sex-based difference may be due to death being a  
7 competing risk for hospitalization in men, such that men with HF may suffer earlier deaths  
8 whereas women with HF survive to an older age and are more likely to become hospitalized.  
9 Alternatively, it is possible that the rates of hospitalization in men and women reflect the  
10 underlying HF type, since men are more likely to have HFrEF (for which there are several  
11 treatments known to improve outcomes and decrease hospitalization) while women are more  
12 likely to have HFpEF (for which there are no substantial evidence-based therapies). Nonetheless,  
13 the observed sex differences may also be attributed to the greater co-morbidity burden in women,  
14 differences in social determinants of health, or genetic or physiologic differences that cannot be  
15 explained within the observational context of this study; all of these point to the need for further  
16 exploration to determine the adverse trends for mortality and hospitalization in women with a  
17 diagnosis of HF.

### 18 **Trends in HF Co-morbidities**

19 Sex-based differences in co-morbidities have been previously reported in hospitalized  
20 patients; women with HF are older and more likely than men to have co-morbid hypertension,  
21 renal failure, obesity, and depression. Men with HF are more often smokers, and tend to have  
22 more ischemic heart disease, COPD, and HFrEF<sup>40</sup>. Our study is the first to report on the  
23 relationship between sex and co-morbidity in ambulatory HF patients over time. Compared to our  
24 historical cohort, our most recent cohort of patients demonstrates an overall increase in important



1 co-morbidities such as frailty, diabetes, renal disease, MI, atrial fibrillation, COPD and  
2 hypertension. This has been observed in other population-based studies<sup>8</sup> and speaks to the  
3 increased complexity of the HF patient in the current era. The increased prevalence of these co-  
4 morbidities over time was seen in both women and men. Certain co-morbidities remained more  
5 common in women than in men in both the historical and recent cohorts; including depression,  
6 hypertension, advanced age, frailty, dementia and thyroid disease. Interestingly, frailty, chronic  
7 pulmonary disease, and metastatic cancer became more common in women than men in the  
8 recent cohort. Collectively these findings suggest that the co-morbidity of the HF patient is  
9 increasing over time, and that women continue to experience a greater co-morbidity burden than  
10 men. This observation may also explain in part the sex difference in mortality trends.

11       Important trends in the risk associated with these co-morbidities were also observed.  
12 Hypertension conferred a greater protective effect in the modern era. This may actually reflect the  
13 known adverse prognosis associated with low blood pressure in HF<sup>41,42</sup>. In addition, the risk  
14 associated with diabetes, renal disease and pulmonary circulatory disease has decreased over  
15 time. In addition, MI was no longer a mortality risk factor in the recent cohort when compared to  
16 the historical cohort. These changes over time may be due to significant advances in the medical  
17 management of these co-morbidities, which have influenced overall survival.

18       Sex-based differences in the risks associated with certain co-morbidities were also  
19 observed. In the most recent cohort, MI had a mild protective effect in men but not in women.  
20 This may be due to a lower detection rate of ischemic heart disease in women due to  
21 atypical presentation<sup>43</sup>, which leads to missed management and poorer outcomes.  
22 Ischemic heart disease is a leading cause of HF in both sexes. When diagnosed with

1  
2  
3 1 ischemic heart disease, women are less likely than men to undergo cardiac  
4  
5  
6  
7 2 catheterization and revascularization; whether this is wholly attributed to the increased  
8  
9  
10 3 microvascular disease in women is not well understood<sup>44</sup>. In the most recent cohort,  
11  
12  
13 4 peripheral arterial disease was associated with a higher risk of mortality in women, while COPD,  
14  
15  
16 5 dementia and malignancy posed a greater risk of mortality in men. Whether these differences are  
17  
18 6 clinically relevant, or help to explain the variability in mortality risk associated with HF, remains  
19  
20 7 to be determined. There remains a significant knowledge gap on sex specific differences in  
21  
22 8 epidemiology, pathophysiology, management and prognosis of co-morbidities related to HF<sup>40</sup>.  
23  
24  
25 9 Such knowledge could determine if HF management should be targeted to specific sex-based co-  
26  
27 10 morbidities to improve outcomes and narrow the gap in mortality improvement between women  
28  
29  
30 11 and men.

## 31 12 **Limitations and Strengths**

32  
33  
34 13 Our study has several limitations. *Firstly*, cases of HF were identified in the ambulatory  
35  
36 14 care setting based on the requirement of 2 claims for HF within one year. Although this method  
37  
38 15 may have led to an underestimate of HF, it has been validated previously and shown to improve  
39  
40 16 the specificity of our case selection<sup>7,9</sup>. *Secondly*, information on ejection fraction was not  
41  
42 17 available in the databases used, which precluded analyses in subtypes of HF based on ventricular  
43  
44 18 function. *Thirdly*, the diagnostic criteria for HFpEF have become more specific over time;  
45  
46 19 whether this may influence incidence and prognosis cannot be determined from this study.  
47  
48  
49  
50 20 *Finally*, cohort studies are by nature subjected to residual confounding. Despite these limitations,  
51  
52 21 our study is the first to address the epidemiology of HF in a validated cohort of *ambulatory*  
53  
54  
55 22 patients, and one of the first to report on detailed sex-based outcome and co-morbidity  
56  
57  
58  
59  
60

1 differences within a large universal healthcare system, using the same entry criteria over a 20-  
2 year time period. The nature of our publicly funded healthcare system allowed for complete  
3 analysis of all Ontario HF patients, which minimized selection bias and greatly improved the  
4 generalizability of our findings.

## 6 **Conclusions**

7 Over a 20-year window, we found an overall reduction in all-cause mortality in the year  
8 following HF diagnosis. However, there was a much larger reduction of mortality in men than in  
9 women, and HF hospitalization rates have decreased for men but remained unchanged in women.  
10 Female HF patients continue to experience a greater burden of co-morbidities than male HF  
11 patients in the modern era. Further research should focus on the determinants of this disparity  
12 such as sex differences in medical and device management, to better characterize incidence and  
13 outcomes by HF type, and ways to reduce this gap in outcomes.

## 16 **Authorship Contributions:**

17 Conception: LYS, LMM

18 Design: LYS, LMM, JVT

19 Data acquisition and analysis: LYS, ABE

20 Interpretation of results: all

21 Drafting of manuscript: LYS, LMM

22 Critical revision: all

23 Agreement to be accountable for all aspects of the work: LYS

1  
2  
3 1  
4  
5 2 **Funding:** This work was supported by a Team grant from the University of Ottawa Heart Institute  
6  
7  
8 3 (UOHI) (Grant #4556) Ontario, Canada. Dr. Sun is supported by the Ottawa Heart Institute  
9  
10 4 Research Corporation and holds a Tier 2 Clinical Research Chair in Big Data and Cardiovascular  
11  
12 5 Outcomes. Dr. Mielniczuk holds a University of Ottawa Tier-1 Chair in Heart Failure Research  
13  
14 6 and is supported as a Clinician Scientist from the Heart and Stroke Foundation of Ontario (HSFO).  
15  
16  
17 7 Drs. Austin and Beanlands hold Career Investigator Awards from the HSFO. Dr. Beanlands holds  
18  
19 8 a University of Ottawa Tier-1 Chair in Cardiac Imaging Research; and is the UOHI Vered Chair  
20  
21 9 in Cardiology. Dr. Tu was supported by a Canada Research Chair in Health Services Research and  
22  
23  
24 10 an Eaton Scholar Award from the Department of Medicine, University of Toronto, Ontario,  
25  
26 11 Canada. The funders do not have a role in the design and conduct of the study, in the collection,  
27  
28 12 analysis, and interpretation of the data, nor in the preparation, review, or approval of the  
29  
30  
31 13 manuscript.

32  
33 14  
34  
35 15 **Acknowledgement:** This study was supported by the Institute for Clinical Evaluative Sciences  
36  
37 16 (ICES), which is funded by an annual grant from the Ontario Ministry of Health and Long-Term Care  
38  
39 17 (MOHLTC). The authors acknowledge the usage of data compiled and provided by the Canadian  
40  
41 18 Institute for Health Information. These datasets were linked using unique encoded identifiers and  
42  
43 19 analyzed at ICES. The analyses, conclusions, opinions and statements expressed in the manuscript are  
44  
45 20 those of the authors, and do not necessarily reflect those of the above agencies.  
46  
47  
48  
49 21

50  
51 22 **Declaration of Interests:** none  
52  
53  
54  
55  
56  
57  
58  
59  
60

## 1 References

1. McMurray JJ, Adamopoulos S, Anker SD, Auricchio A, Bohm M, Dickstein K, Falk V, Filippatos G, Fonseca C, Gomez-Sanchez MA, Jaarsma T, Kober L, Lip GY, Maggioni AP, Parkhomenko A, Pieske BM, Popescu BA, Ronnevik PK, Rutten FH, Schwitter J, Seferovic P, Stepinska J, Trindade PT, Voors AA, Zannad F, Zeiher A and Guidelines ESCCfP. ESC Guidelines for the diagnosis and treatment of acute and chronic heart failure 2012: The Task Force for the Diagnosis and Treatment of Acute and Chronic Heart Failure 2012 of the European Society of Cardiology. Developed in collaboration with the Heart Failure Association (HFA) of the ESC. *Eur Heart J*. 2012;33:1787-847.
2. Huffman MD, Berry JD, Ning H, Dyer AR, Garside DB, Cai X, Daviglius ML and Lloyd-Jones DM. Lifetime risk for heart failure among white and black Americans: cardiovascular lifetime risk pooling project. *Journal of the American College of Cardiology*. 2013;61:1510-7.
3. Roger VL, Go AS, Lloyd-Jones DM, Adams RJ, Berry JD, Brown TM, Carnethon MR, Dai S, de Simone G, Ford ES, Fox CS, Fullerton HJ, Gillespie C, Greenlund KJ, Hailpern SM, Heit JA, Ho PM, Howard VJ, Kissela BM, Kittner SJ, Lackland DT, Lichtman JH, Lisabeth LD, Makuc DM, Marcus GM, Marelli A, Matchar DB, McDermott MM, Meigs JB, Moy CS, Mozaffarian D, Mussolino ME, Nichol G, Paynter NP, Rosamond WD, Sorlie PD, Stafford RS, Turan TN, Turner MB, Wong ND, Wylie-Rosett J, American Heart Association Statistics C and Stroke Statistics S. Heart disease and stroke statistics--2011 update: a report from the American Heart Association. *Circulation*. 2011;123:e18-e209.
4. Heiat A, Gross CP and Krumholz HM. Representation of the elderly, women, and minorities in heart failure clinical trials. *Arch Intern Med*. 2002;162:1682-8.
5. Scantlebury DC and Borlaug BA. Why are women more likely than men to develop heart failure with preserved ejection fraction? *Curr Opin Cardiol*. 2011;26:562-8.
6. Kenchaiah S and Vasani RS. Heart Failure in Women--Insights from the Framingham Heart Study. *Cardiovasc Drugs Ther*. 2015;29:377-90.
7. Yeung DF, Boom NK, Guo H, Lee DS, Schultz SE and Tu JV. Trends in the incidence and outcomes of heart failure in Ontario, Canada: 1997 to 2007. *CMAJ*. 2012;184:E765-73.
8. Christiansen MN, Kober L, Weeke P, Vasani RS, Jeppesen JL, Smith JG, Gislason GH, Torp-Pedersen C and Andersson C. Age-Specific Trends in Incidence, Mortality, and Comorbidities of Heart Failure in Denmark, 1995 to 2012. *Circulation*. 2017;135:1214-1223.
9. Schultz SE, Rothwell DM, Chen Z and Tu K. Identifying cases of congestive heart failure from administrative data: a validation study using primary care patient records. *Chronic Dis Inj Can*. 2013;33:160-6.
10. Tu K, Campbell NRC, Chen ZL, Cauch-Dudek KJ and McAlister FA. Accuracy of administrative databases in identifying patients with hypertension. *Open Medicine*. 2007;1.
11. Juurlink D, Preya C, Croxford R, Chong A, Austin P, Tu J and Laupacis A. *Canadian Institute for Health Information Discharge Abstract Database: A Validation Study. ICES Investigative Report*. Toronto, ON: Institute for Clinical Evaluative Sciences; 2006.
12. Hux JE, Ivis F, Flintoft V and Bica A. Diabetes in Ontario: determination of prevalence and incidence using a validated administrative data algorithm. *Diabetes Care*. 2002;25.
13. Austin PC, Daly PA and Tu JV. A multicenter study of the coding accuracy of hospital discharge administrative data for patients admitted to cardiac care units in Ontario. *Am Heart J*. 2002;144.
14. du Plessis V, Beshiri R, Bollman RD and Clemeson H. *Definitions of "rural". Agriculture and Rural Working Paper Series, No. 61*. Ottawa, ON: Statistics Canada; 2002.

- 1 15. Gershon AS, Wang C, Guan J, Vasilevska-Ristovska J, Cicutto L and To T. Identifying  
2 patients with physician-diagnosed asthma in health administrative databases. *Can Respir J*.  
3 2009;16.
- 4 16. Gershon AS, Wang C, Guan J, Vasilevska-Ristovska J, Cicutto L and To T. Identifying  
5 individuals with physician diagnosed COPD in health administrative databases. *COPD*. 2009;6.
- 6 17. Quan H, Sundararajan V, Halfon P, Fong A, Burnand B, Luthi JC, Saunders LD, Beck  
7 CA, Feasby TE and Ghali WA. Coding algorithms for defining comorbidities in ICD-9-CM and  
8 ICD-10 administrative data. *Med Care*. 2005;43.
- 9 18. Sun LY, Gershon AS, Ko DT, Thilen SR, Yun L, Beattie WS and Wijeyesundera DN.  
10 Trends in Pulmonary Function Testing Before Noncardiothoracic Surgery. *JAMA Intern Med*.  
11 2015;175:1410-2.
- 12 19. Sun L.Y. Tu JV, Coutinho T., Turek M., Rubens F., McDonnell L., Tulloch H.,  
13 Mielniczuk L.M. Sex Differences in Heart Failure Outcomes in an Ambulatory, Population-  
14 Based Cohort. *CMAJ*. 2018;190:E848-E854.
- 15 20. Sun L.Y. Tu JV, Lee D.S., Beanlands R.S., Ruel M., Austin P.C., Bader Eddeen A., Liu  
16 P.P. Disability-Free Survival After Coronary Artery Bypass Grafting in Women and Men with  
17 Heart Failure. *BMJ Open Heart*. 2018;5:e000911.
- 18 21. Sun LY, Gaudino M, Chen RJ, Bader Eddeen A and Ruel M. Long-term Outcomes in  
19 Patients With Severely Reduced Left Ventricular Ejection Fraction Undergoing Percutaneous  
20 Coronary Intervention vs Coronary Artery Bypass Grafting. *JAMA cardiology*. 2020.
- 21 22. Sun LY, Kimmoun A, Takagi K, Liu PP, Bader Eddeen A and Mebazaa A. Ethnic  
22 differences in acute heart failure outcomes in Ontario. *Int J Cardiol*. 2019;291:177-182.
- 23 23. Sun LY, Tu JV, Eddeen AB and Liu PP. Prevalence and long-term survival after coronary  
24 artery bypass grafting in women and men with heart failure and preserved versus reduced  
25 ejection fraction. *Journal of the American Heart Association*. 2018;7:1-14.
- 26 24. Sun LY, Tu JV, Sherrard H, Rodger N, Coutinho T, Turek M, Chan E, Tulloch H,  
27 McDonnell L and Mielniczuk LM. Sex-Specific Trends in Incidence and Mortality for Urban and  
28 Rural Ambulatory Patients with Heart Failure in Eastern Ontario from 1994 to 2013. *Journal of*  
29 *Cardiac Failure*. 2018;24:568-574.
- 30 25. Tran DTT, Tu JV, Dupuis J-Y, Bader Eddeen A and Sun LY. Association of Frailty and  
31 Long-Term Survival in Patients Undergoing Coronary Artery Bypass Grafting. *Journal of the*  
32 *American Heart Association*. 2018;7.
- 33 26. Johnston AM, T. G; Lee, D. S.; Bader Eddeen, A.; Sun, L. Y. Sex Differences in Long-  
34 Term Survival After Major Cardiac Surgery: A Population-Based Cohort Study. *Journal of the*  
35 *American Heart Association*. 2019;8:e013260.
- 36 27. Hayatsu Y, Ruel M, Bader Eddeen A and Sun L. Single Versus Multiple Arterial  
37 Revascularization in Patients With Reduced Renal Function: Long-term Outcome Comparisons  
38 in 23,406 CABG Patients From Ontario, Canada. *Ann Surg*. 2020.
- 39 28. Sun LY, Spence SD, Benton S, Beanlands RS, Austin PC, Bader Eddeen A and Lee DS.  
40 Age, Not Sex, Modifies the Effect of Frailty on Long-term Outcomes After Cardiac Surgery. *Ann*  
41 *Surg*. 2020.
- 42 29. Rubens FD, Wells GA, Coutinho T, Eddeen AB and Sun LY. Sex differences after  
43 coronary artery bypass grafting with a second arterial conduit. *The Journal of thoracic and*  
44 *cardiovascular surgery*. 2020.
- 45 30. Lieberman R AC, Weiner J. Development and evaluation of the Johns Hopkins University  
46 Risk Adjustment Models for Medicare+ Choice Plan Payment. 2003.



- 1  
2  
3 1 31. Sternberg SA, Bentur N, Abrams C, Spalter T, Karpati T, Lemberger J and Heymann AD.  
4 2 Identifying frail older people using predictive modeling. *Am J Manag Care*. 2012;18:e392-7.  
5 3 32. The Johns Hopkins Adjusted Clinical Groups Technical Reference Guide, version 9.0.  
6 4 2009.  
7 5 33. Bronskill S CM, Costa A, et al. Aging in Ontario: An ICES Chartbook of Health Services  
8 6 Use by Older Adults - a Technical Report. 2010.  
9 7 34. Bronskill S CX, Gruneir A, Ho M. Health system use by frail Ontario seniors: an in-depth  
10 8 examination of four vulnerable cohorts. 2011.  
11 9 35. Levy D, Kenchaiah S, Larson MG, Benjamin EJ, Kupka MJ, Ho KK, Murabito JM and  
12 10 Vasan RS. Long-term trends in the incidence of and survival with heart failure. *N Engl J Med*.  
13 11 2002;347:1397-402.  
14 12 36. Roger VL, Weston SA, Redfield MM, Hellermann-Homan JP, Killian J, Yawn BP and  
15 13 Jacobsen SJ. Trends in heart failure incidence and survival in a community-based population.  
16 14 *JAMA*. 2004;292:344-50.  
17 15 37. Writing Committee M, Yancy CW, Jessup M, Bozkurt B, Butler J, Casey DE, Jr., Colvin  
18 16 MM, Drazner MH, Filippatos G, Fonarow GC, Givertz MM, Hollenberg SM, Lindenfeld J,  
19 17 Masoudi FA, McBride PE, Peterson PN, Stevenson LW and Westlake C. 2016 ACC/AHA/HFSA  
20 18 Focused Update on New Pharmacological Therapy for Heart Failure: An Update of the 2013  
21 19 ACCF/AHA Guideline for the Management of Heart Failure: A Report of the American College  
22 20 of Cardiology/American Heart Association Task Force on Clinical Practice Guidelines and the  
23 21 Heart Failure Society of America. *Circulation*. 2016;134:e282-93.  
24 22 38. Taylor AL. Heart failure in women. *Curr Heart Fail Rep*. 2015;12:187-95.  
25 23 39. Ziaeeian B, Kominski GF, Ong MK, Mays VM, Brook RH and Fonarow GC. National  
26 24 Differences in Trends for Heart Failure Hospitalizations by Sex and Race/Ethnicity. *Circ*  
27 25 *Cardiovasc Qual Outcomes*. 2017;10.  
28 26 40. Hopper I, Kotecha D, Chin KL, Mentz RJ and von Lueder TG. Comorbidities in Heart  
29 27 Failure: Are There Gender Differences? *Curr Heart Fail Rep*. 2016;13:1-12.  
30 28 41. Raphael CE, Whinnett ZI, Davies JE, Fontana M, Ferenczi EA, Manisty CH, Mayet J and  
31 29 Francis DP. Quantifying the paradoxical effect of higher systolic blood pressure on mortality in  
32 30 chronic heart failure. *Heart*. 2009;95:56-62.  
33 31 42. Schmid FA, Schlager O, Keller P, Seifert B, Huang R, Frohlich GM, Luscher TF,  
34 32 Ruschitzka F and Enseleit F. Prognostic value of long-term blood pressure changes in patients  
35 33 with chronic heart failure. *Eur J Heart Fail*. 2017;19:837-842.  
36 34 43. Jarvie JL and Foody JM. Recognizing and improving health care disparities in the  
37 35 prevention of cardiovascular disease in women. *Curr Cardiol Rep*. 2010;12:488-96.  
38 36 44. McSweeney J, Pettey C, Lefler LL and Heo S. Disparities in heart failure and other  
39 37 cardiovascular diseases among women. *Women's health (London, England)*. 2012;8:473-85.

1  
2  
3 **1 FIGURE LEGENDS**  
4

5  
6 2 Figure 1. Sex-specific temporal trends in the incidence of heart failure in Ontario from April 1,  
7  
8 3 1994 to March 31, 2014.

9  
10 4 Legend: Incidence rates were directly standardized by age and expressed per 100,000. The solid  
11  
12 5 line represents incidence trends in women. The dotted line represents incidence trends in men.

13  
14  
15 6  
16 7  
17 8 Figure 2. Sex-specific temporal trends in mortality within one year of ambulatory heart failure  
18  
19 9 diagnosis.

20  
21 10 Legend: Mortality rates were directly standardized by age and expressed per 1000. The solid line  
22  
23 11 represents mortality trends in women. The dotted line represents mortality trends in men.

24  
25  
26 12  
27 13  
28 14 Figure 3. Kaplan-Meier curves representing temporal trends in one-year survival after heart  
29  
30 15 failure diagnosis, in each of the 5-year cohorts.

31  
32  
33 16 Legend: The red line represents survival in men. The blue line represents survival in women.

34  
35 17  
36  
37 18 Figure 4a. Stacked Kaplan-Meier curves representing temporal trends in one-year survival after  
38  
39 19 heart failure diagnosis in men.

40  
41  
42 20 Legend: The red line represents survival in the historical cohort (1994-1998). The blue line  
43  
44 21 represents survival in the 1999-2003 cohort. The orange line represents survival in the 2004-2008  
45  
46 22 cohort. The green line represents survival in the modern cohort (2009-2013).

47  
48  
49 23  
50  
51 24 Figure 4b. Stacked Kaplan-Meier curves representing temporal trends in one-year survival after  
52  
53 25 heart failure diagnosis in women.



1  
2  
3  
4  
5  
6  
7  
8  
9  
10  
11  
12  
13  
14  
15  
16  
17  
18  
19  
20  
21  
22  
23  
24  
25  
26  
27  
28  
29  
30  
31  
32  
33  
34  
35  
36  
37  
38  
39  
40  
41  
42  
43  
44  
45  
46  
47  
48  
49  
50  
51  
52  
53  
54  
55  
56  
57  
58  
59  
60

1 Legend: The red line represents survival in the historical cohort (1994-1998). The blue line  
2 represents survival in the 1999-2003 cohort. The orange line represents survival in the 2004-2008  
3 cohort. The green line represents survival in the modern cohort (2009-2013).

For peer review only

1  
2  
3 1 Figure 1. Sex-specific temporal trends in the incidence of heart failure in Ontario from April 1, 1994 to March 31,  
4 2014.  
5  
6  
7 3 Legend: Incidence rates were directly standardized by age using the 1991 Canadian population aged  $\geq 40$  years as  
8  
9 4 the reference population and expressed per 100,000. The solid line represents incidence trends in women. The dotted  
10  
11 5 line represents incidence trends in men.  
12  
13 6

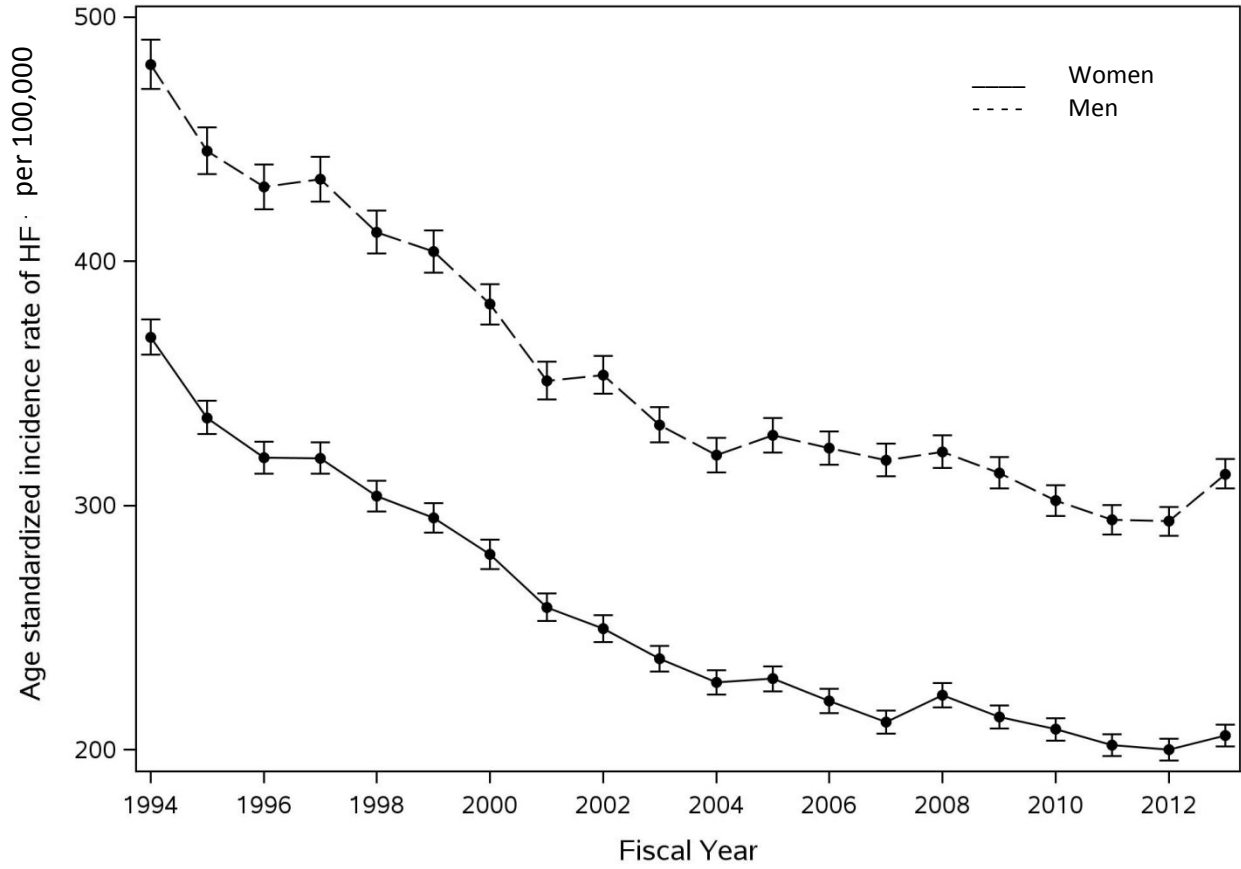

7  
8  
9

1 Figure 2. Sex-specific temporal trends in mortality within one year of ambulatory heart failure diagnosis.  
2  
3  
4  
5 Legend: Mortality rates were directly standardized by age using the 1991 Canadian population aged  $\geq 40$  years as the  
6  
7 reference population and expressed per 1000. The solid line represents mortality trends in women. The dotted line  
8  
9 represents mortality trends in men.

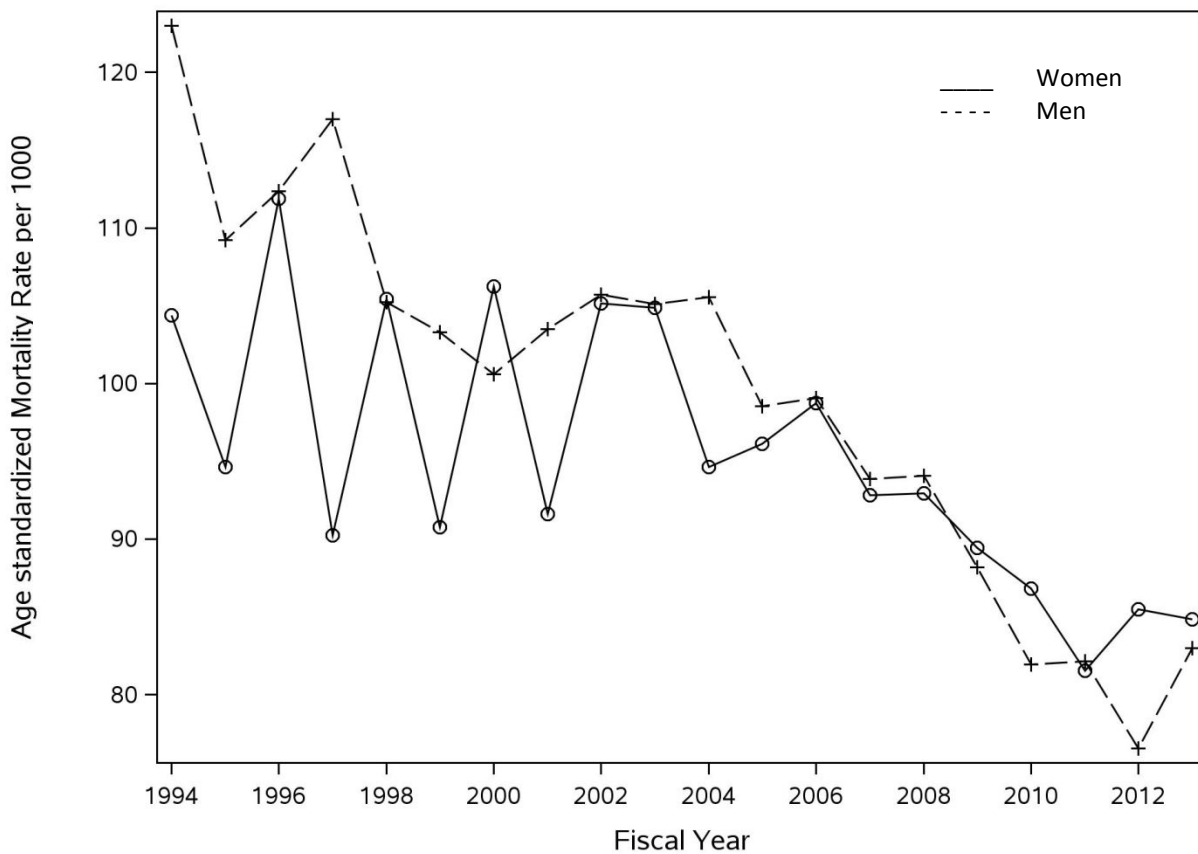

1 Figure 3. Kaplan-Meier curves representing temporal trends in one-year survival after heart failure diagnosis, in each  
 2 of the temporal cohorts.

3 Legend: The red line represents survival in men. The blue line represents survival in women.

4 April 1, 1994 – March 31, 1999:

5 April 1, 1999 – March 31, 2004:

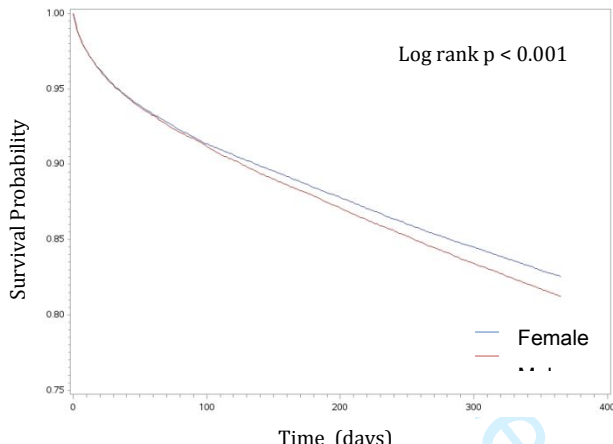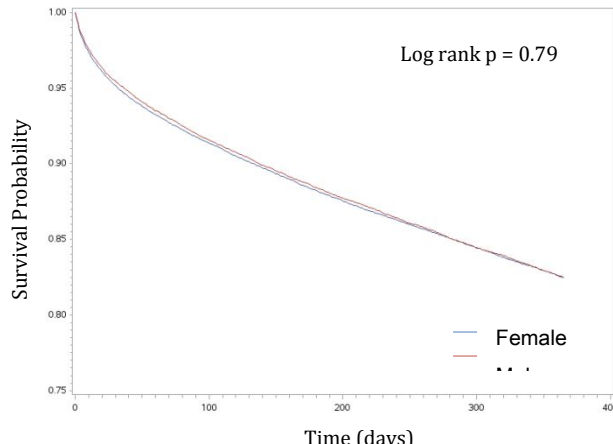

|   |       |       |       |       |   |
|---|-------|-------|-------|-------|---|
| F | 47676 | 43564 | 41952 | 40256 | 0 |
| M | 43907 | 40055 | 38243 | 36604 | 0 |

|   |       |       |       |       |   |
|---|-------|-------|-------|-------|---|
| F | 43190 | 39480 | 37814 | 36447 | 0 |
| M | 42108 | 38567 | 36942 | 35548 | 0 |

6 April 1, 2004 – March 31, 2009:

7 April 1, 2009 – March 31, 2014:

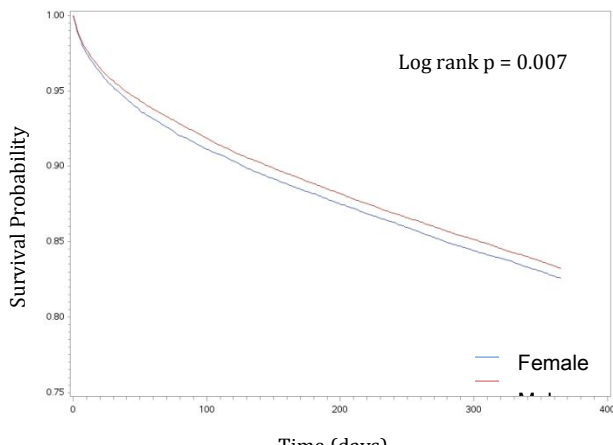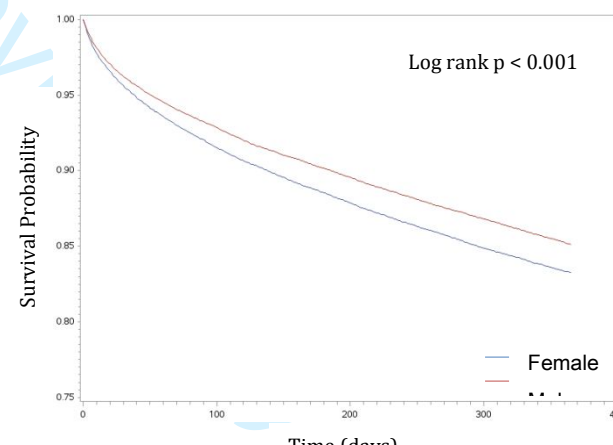

|   |       |       |       |       |   |
|---|-------|-------|-------|-------|---|
| F | 41043 | 37415 | 35917 | 34628 | 0 |
| M | 43698 | 40163 | 38537 | 37182 | 0 |

|   |       |       |       |       |   |
|---|-------|-------|-------|-------|---|
| F | 42746 | 39143 | 37564 | 36266 | 0 |
| M | 47961 | 44552 | 42950 | 41620 | 0 |

1 Figure 4a. Stacked Kaplan-Meier curves representing temporal trends in one-year survival after heart failure  
 2 diagnosis in men.

3 Legend: The red line represents survival in the historical cohort (1994-1998). The blue line represents survival in the  
 4 1999-2003 cohort. The orange line represents survival in the 2004-2008 cohort. The green line represents survival in  
 5 the modern cohort (2009-2013).

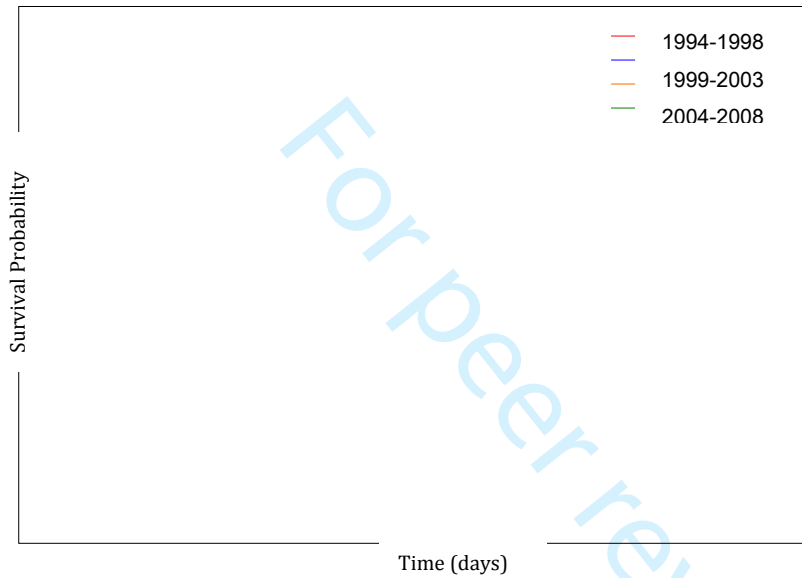

15 Figure 4b. Stacked Kaplan-Meier curves representing temporal trends in one-year survival after heart failure  
 16 diagnosis in women.

17 Legend: The red line represents survival in the historical cohort (1994-1998). The blue line represents survival in the  
 18 1999-2003 cohort. The orange line represents survival in the 2004-2008 cohort. The green line represents survival in  
 19 the modern cohort (2009-2013).

20 Table 1. Tempor

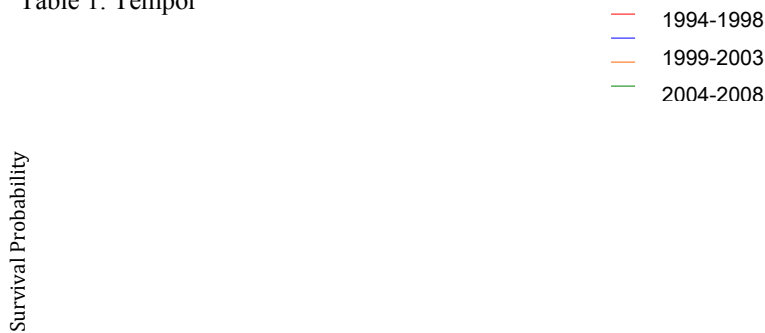

1 Table 1. Temporal trends in characteristics of men and women with incident heart failure over time.

| Variable                  | Historic Cohort (1994-1998) |                 |             | 1999 – 2003       |                  |             | 2004-2009          |                 |             | Modern Cohort (2009-2013) |                  |             |
|---------------------------|-----------------------------|-----------------|-------------|-------------------|------------------|-------------|--------------------|-----------------|-------------|---------------------------|------------------|-------------|
|                           | Women<br>N=47,676           | Men<br>N=43,907 | P-<br>Value | Women<br>N=43,190 | Men<br>N=42,108  | P-<br>Value | Women<br>N=41,0423 | Men<br>N=43,698 | P-<br>Value | Women<br>N=42,746         | Men<br>N=47,961  | P-<br>Value |
| <b>Socio-Demographics</b> |                             |                 |             |                   |                  |             |                    |                 |             |                           |                  |             |
| Age (Mean ± SD)           | 76.3 ± 11.2                 | 72.0 ± 11.3     | <.001       | 76.2 ± 11.8       | 71.9 ± 11.8      | <.001       | 76.0 ± 12.3        | 71.6 ± 12.4     | <.001       | 75.8 ± 12.9               | 71.5 ± 12.8      | <.001       |
| Rurality                  | 8,256 (17.3)                | 8,518 (19.4)    | <.001       | 6,781 (15.7)      | 6,996 (16.6)     | <.001       | 5,602 (13.6)       | 6,667 (15.3)    | <.001       | 5,358 (12.5)              | 6,788 (14.2)     | <.001       |
| Income Quintile           |                             |                 |             |                   |                  |             |                    |                 |             |                           |                  |             |
| 1 (Lowest)                | 11,651 (24.4)               | 9,297 (21.2)    | <.001       | 10,121<br>(23.4)  | 8,529 (20.3)     | <.001       | 9,661 (23.5)       | 9,096 (20.8)    | <.001       | 9,613 (22.5)              | 9,541 (19.9)     | <.001       |
| 2                         | 10,377 (21.8)               | 9,418 (21.4)    |             | 9,814 (22.7)      | 9,319 (22.1)     |             | 9,070 (22.1)       | 9,317 (21.3)    |             | 9,243 (21.6)              | 9,833 (20.5)     |             |
| 3                         | 9,506 (19.9)                | 8,983 (20.5)    |             | 8,571 (19.8)      | 8,683 (20.6)     |             | 7,891 (19.2)       | 8,576 (19.6)    |             | 8,325 (19.5)              | 9,444 (19.7)     |             |
| 4                         | 8,208 (17.2)                | 8,024 (18.3)    |             | 7,403 (17.1)      | 7,770 (18.5)     |             | 7,274 (17.7)       | 8,308 (19.0)    |             | 8,017 (18.8)              | 9,775 (20.4)     |             |
| 5 (Highest)               | 7,698 (16.1)                | 7,956 (18.1)    |             | 7,168 (16.6)      | 7,690 (18.3)     |             | 6,976 (17.0)       | 8,233 (18.8)    |             | 7,388 (17.3)              | 9,188 (19.2)     |             |
| <b>Comorbidities</b>      |                             |                 |             |                   |                  |             |                    |                 |             |                           |                  |             |
| Uncomplicated HTN         | 31,751 (66.6)               | 26,068 (59.4)   | <.001       | 31,381<br>(72.7)  | 27,909<br>(66.3) | <.001       | 31,336 (76.3)      | 30,730 (70.3)   | <.001       | 32,809 (76.8)             | 34,103<br>(71.1) | <.001       |

|    |                       |               |               |       |              |              |       |               |               |       |               |              |       |
|----|-----------------------|---------------|---------------|-------|--------------|--------------|-------|---------------|---------------|-------|---------------|--------------|-------|
| 1  |                       |               |               |       |              |              |       |               |               |       |               |              |       |
| 2  |                       |               |               |       |              |              |       |               |               |       |               |              |       |
| 3  | Complicated HTN       | 2,507 (5.3)   | 2,006 (4.6)   | <.001 | 2,178 (5.0)  | 1,921 (4.6)  | <.001 | 3,254 (7.9)   | 3,551 (8.1)   | 0.29  | 32,809 (76.8) | 6,516 (13.6) | 0.15  |
| 4  |                       |               |               |       |              |              |       |               |               |       |               |              |       |
| 5  | Atrial Fibrillation   | 4,660 (9.8)   | 4,769 (10.9)  | <.001 | 5,034 (11.7) | 5,313 (12.6) | <.001 | 5,180 (12.6)  | 5,956 (13.6)  | <.001 | 5,669 (13.3)  | 6,919 (14.4) | 0.035 |
| 6  |                       |               |               |       |              |              |       |               |               |       |               |              |       |
| 7  | Myocardial Infarction | 2,954 (6.2)   | 4,697 (10.7)  | <.001 | 3,629 (8.4)  | 5,937 (14.1) | <.001 | 4,323 (10.5)  | 8,030 (18.4)  | <.001 | 5,957 (13.9)  | 9,617 (20.1) | <.001 |
| 8  |                       |               |               |       |              |              |       |               |               |       |               |              |       |
| 9  | Valvular Disease      | 1,835 (3.8)   | 1,864 (4.2)   | 0.002 | 1,981 (4.6)  | 2,087 (5.0)  | 0.002 | 1,759 (4.3)   | 2,163 (4.9)   | <.001 | 5,051 (11.8)  | 2,841 (5.9)  | <.001 |
| 10 |                       |               |               |       |              |              |       |               |               |       |               |              |       |
| 11 | PVD                   | 3,136 (6.6)   | 3,994 (9.1)   | <.001 | 2,928 (6.8)  | 3,684 (8.7)  | <.001 | 1,584 (3.9)   | 2,405 (5.5)   | <.001 | 2,099 (4.9)   | 2,257 (4.7)  | <.001 |
| 12 |                       |               |               |       |              |              |       |               |               |       |               |              |       |
| 13 | CVD                   | 4,429 (9.3)   | 4,401 (10.0)  | <.001 | 3,841 (8.9)  | 3,834 (9.1)  | <.001 | 2,808 (6.8)   | 3,003 (6.9)   | 0.86  | 1,272 (3.0)   | 2,713 (5.7)  | 0.18  |
| 14 |                       |               |               |       |              |              |       |               |               |       |               |              |       |
| 15 | PCD                   | 296 (0.6)     | 286 (0.7)     | 0.561 | 491 (1.1)    | 362 (0.9)    | 0.56  | 807 (2.0)     | 588 (1.3)     | <.001 | 2,506 (5.9)   | 882 (1.8)    | <.001 |
| 16 |                       |               |               |       |              |              |       |               |               |       |               |              |       |
| 17 | COPD/Asthma           | 13,091 (27.5) | 14,352 (32.7) | <.001 | 14,557       | 14,988       | <.001 | 15,209 (37.1) | 15,996 (36.6) | 0.17  | 1,113 (2.6)   | 17,164       | <.001 |
| 18 |                       |               |               |       |              |              |       |               |               |       |               | (35.8)       |       |
| 19 |                       |               |               |       | (33.7)       | (35.6)       |       |               |               |       |               |              |       |
| 20 |                       |               |               |       |              |              |       |               |               |       |               |              |       |
| 21 | Alcohol Abuse         | 128 (0.3)     | 398 (0.9)     | <.001 | 187 (0.4)    | 562 (1.3)    | <.001 | 313 (0.8)     | 965 (2.2)     | <.001 | 16,261 (38.0) | 1,123 (2.3)  | <.001 |
| 22 |                       |               |               |       |              |              |       |               |               |       |               |              |       |
| 23 | Renal Disease         | 1,127 (2.4)   | 1,527 (3.5)   | <.001 | 1,410 (3.3)  | 1,935 (4.6)  | <.001 | 1,849 (4.5)   | 2,588 (5.9)   | <.001 | 337 (0.8)     | 2,865 (6.0)  | <.001 |
| 24 |                       |               |               |       |              |              |       |               |               |       |               |              |       |
| 25 | Diabetes              | 9,600 (20.1)  | 10,462 (23.8) | <.001 | 10,359       | 12,182       | <.001 | 12,204 (29.7) | 15,243 (34.9) | <.001 | 1,954 (4.6)   | 18,721       | <.001 |
| 26 |                       |               |               |       |              |              |       |               |               |       |               | (39.0)       |       |
| 27 |                       |               |               |       | (24.0)       | (28.9)       |       |               |               |       |               |              |       |
| 28 |                       |               |               |       |              |              |       |               |               |       |               |              |       |
| 29 | Hypothyroidism        | 2,155 (4.5)   | 541 (1.2)     | <.001 | 2,212 (5.1)  | 597 (1.4)    | <.001 | 1,421 (3.5)   | 428 (1.0)     | <.001 | 14,751 (34.5) | 479 (1.0)    | <.001 |
| 30 |                       |               |               |       |              |              |       |               |               |       |               |              |       |
| 31 |                       |               |               |       |              |              |       |               |               |       |               |              |       |
| 32 |                       |               |               |       |              |              |       |               |               |       |               |              |       |
| 33 |                       |               |               |       |              |              |       |               |               |       |               |              |       |
| 34 |                       |               |               |       |              |              |       |               |               |       |               |              |       |
| 35 |                       |               |               |       |              |              |       |               |               |       |               |              |       |
| 36 |                       |               |               |       |              |              |       |               |               |       |               |              |       |
| 37 |                       |               |               |       |              |              |       |               |               |       |               |              |       |
| 38 |                       |               |               |       |              |              |       |               |               |       |               |              |       |
| 39 |                       |               |               |       |              |              |       |               |               |       |               |              |       |
| 40 |                       |               |               |       |              |              |       |               |               |       |               |              |       |
| 41 |                       |               |               |       |              |              |       |               |               |       |               |              |       |
| 42 |                       |               |               |       |              |              |       |               |               |       |               |              |       |
| 43 |                       |               |               |       |              |              |       |               |               |       |               |              |       |
| 44 |                       |               |               |       |              |              |       |               |               |       |               |              |       |
| 45 |                       |               |               |       |              |              |       |               |               |       |               |              |       |
| 46 |                       |               |               |       |              |              |       |               |               |       |               |              |       |
| 47 |                       |               |               |       |              |              |       |               |               |       |               |              |       |

|                       |             |             |       |              |              |       |               |              |       |             |              |       |
|-----------------------|-------------|-------------|-------|--------------|--------------|-------|---------------|--------------|-------|-------------|--------------|-------|
| Liver Disease         | 559 (1.2)   | 772 (1.8)   | <.001 | 541 (1.3)    | 800 (1.9)    | <.001 | 540 (1.3)     | 775 (1.8)    | <.001 | 1,300 (3.0) | 895 (1.9)    | <.001 |
| Dementia              | 1,935 (4.1) | 1,188 (2.7) | <.001 | 2,007 (4.6)  | 1,258 (3.0)  | <.001 | 1,816 (4.4)   | 1,121 (2.6)  | <.001 | 579 (1.4)   | 1,194 (2.5)  | <.001 |
| Depression            | 1,788 (3.8) | 911 (2.1)   | <.001 | 1,617 (3.7)  | 872 (2.1)    | <.001 | 1,364 (3.3)   | 859 (2.0)    | <.001 | 1,791 (4.2) | 756 (1.6)    | <.001 |
| Psychosis             | 1,932 (4.1) | 1,134 (2.6) | <.001 | 1,695 (3.9)  | 1,106 (2.6)  | <.001 | 486 (1.2)     | 350 (0.8)    | <.001 | 1,213 (2.8) | 171 (0.4)    | <.001 |
| Primary Tumor         | 3,055 (6.4) | 4,363 (9.9) | <.001 | 3,026 (7.0)  | 4,045 (9.6)  | <.001 | 2,947 (7.2)   | 4,060 (9.3)  | <.001 | 223 (0.5)   | 4,419 (9.2)  | <.001 |
| Metastatic Malignancy | 869 (1.8)   | 804 (1.8)   | 0.924 | 925 (2.1)    | 775 (1.8)    | 0.92  | 850 (2.1)     | 723 (1.7)    | <.001 | 3,376 (7.9) | 840 (1.8)    | <.001 |
| Paraplegia            | 840 (1.8)   | 899 (2.0)   | 0.002 | 854 (2.0)    | 903 (2.1)    | 0.002 | 521 (1.3)     | 572 (1.3)    | 0.61  | 1,000 (2.3) | 475 (1.0)    | 0.71  |
| VTE                   | 1,161 (2.4) | 1,017 (2.3) | 0.238 | 945 (2.2)    | 714 (1.7)    | 0.24  | 557 (1.4)     | 505 (1.2)    | 0.008 | 434 (1.0)   | 512 (1.1)    | 0.83  |
| Frailty               | 4,302 (9.0) | 2,700 (6.1) | <.001 | 5,598 (13.0) | 4,364 (10.4) | <.001 | 10,163 (24.8) | 7,175 (16.4) | <.001 | 450 (1.1)   | 8,409 (17.5) | <.001 |

1 Values are expressed number (%) unless otherwise indicated. SD, standard deviation; HTN, hypertension; IHD, ischemic heart disease; PAD, peripheral arterial  
 2 disease; CVD, cerebrovascular disease; PCD, pulmonary circulatory disease; COPD, chronic obstructive pulmonary disease; VTE, venous thromboembolism



1 Table 2. Evolution of multivariable risk factors of one-year mortality over time. Risk factors that have changed in  
 2 magnitude between the historical (1994-1998) and modern (2009-2013) times are indicated in bold.

| Variable                      | Adjusted HR (95% CI)    |                  |                  |                         |
|-------------------------------|-------------------------|------------------|------------------|-------------------------|
|                               | 1994-1998               | 1999-2003        | 2004-2008        | 2009-2013               |
| Age Category                  |                         |                  |                  |                         |
| 40-64 years                   | Reference               | Reference        | Reference        | Reference               |
| 65-74 years                   | 1.56 (1.47-1.65)        | 1.64 (1.53-1.74) | 1.66 (1.56-1.77) | 1.54 (1.44-1.64)        |
| 75-84 years                   | <b>2.26 (2.14-2.39)</b> | 2.36 (2.23-2.5)  | 2.48 (2.34-2.63) | <b>2.58 (2.43-2.73)</b> |
| > 85 years                    | <b>3.68 (3.48-3.90)</b> | 4.25 (4.00-4.51) | 4.57 (4.31-4.85) | <b>4.89 (4.62-5.18)</b> |
| Female                        | <b>0.85 (0.82-0.88)</b> | 0.89 (0.86-0.92) | 0.91 (0.88-0.94) | <b>0.97 (0.93-1.00)</b> |
| Rural                         | <b>0.94 (0.90-0.98)</b> | 1.00 (0.96-1.05) | 0.99 (0.95-1.04) | <b>1.01 (0.96-1.06)</b> |
| Income Quintile               |                         |                  |                  |                         |
| 1 (Low)                       | 1.06 (1.01-1.11)        | 1.08 (1.03-1.14) | 1.12 (1.06-1.18) | 1.08 (1.02-1.14)        |
| 2                             | 1.03 (0.98-1.08)        | 1.04 (0.99-1.09) | 1.04 (0.99-1.10) | 1.04 (0.98-1.09)        |
| 3                             | 1.06 (1.01-1.11)        | 1.03 (0.98-1.09) | 1.04 (0.98-1.10) | 0.99 (0.94-1.04)        |
| 4                             | 1.02 (0.97-1.08)        | 0.99 (0.94-1.05) | 1.08 (1.03-1.14) | 1.01 (0.95-1.06)        |
| 5 (High)                      | Reference               | Reference        | Reference        | Reference               |
| Benign Hypertension           | 0.76 (0.74-0.79)        | 0.74 (0.72-0.77) | 0.73 (0.70-0.76) | 0.78 (0.75-0.81)        |
| Complicated Hypertension      | <b>0.93 (0.86-1.00)</b> | 0.95 (0.88-1.02) | 0.87 (0.82-0.93) | <b>0.77 (0.73-0.81)</b> |
| Atrial Fibrillation           | <b>0.89 (0.85-0.94)</b> | 0.92 (0.88-0.96) | 0.96 (0.92-1.01) | <b>0.99 (0.95-1.04)</b> |
| Myocardial Infarction         | <b>1.12 (1.06-1.18)</b> | 0.99 (0.94-1.05) | 1.02 (0.97-1.06) | <b>0.98 (0.94-1.03)</b> |
| Valvular Disease              | <b>1.00 (0.92-1.08)</b> | 0.98 (0.91-1.06) | 0.97 (0.90-1.05) | <b>0.93 (0.86-1.00)</b> |
| Peripheral Arterial Disease   | 1.22 (1.16-1.29)        | 1.2 (1.14-1.27)  | 1.28 (1.20-1.37) | 1.34 (1.24-1.44)        |
| Cerebrovascular Disease       | 1.29 (1.23-1.35)        | 1.25 (1.19-1.32) | 1.23 (1.16-1.30) | 1.20 (1.13-1.28)        |
| Pulmonary Circulatory Disease | <b>1.67 (1.43-1.96)</b> | 1.73 (1.52-1.97) | 1.54 (1.38-1.71) | <b>1.24 (1.12-1.37)</b> |
| COPD/Asthma                   | 1.15 (1.12-1.19)        | 1.18 (1.14-1.22) | 1.21 (1.17-1.25) | 1.17 (1.13-1.21)        |
| Alcohol Abuse                 | <b>1.16 (0.97-1.38)</b> | 1.34 (1.16-1.55) | 1.51 (1.34-1.70) | <b>1.62 (1.45-1.82)</b> |
| Renal Disease                 | <b>2.04 (1.90-2.18)</b> | 1.86 (1.74-1.98) | 1.73 (1.63-1.84) | <b>1.67 (1.58-1.77)</b> |

|    |                        |                         |                  |                  |                         |
|----|------------------------|-------------------------|------------------|------------------|-------------------------|
| 1  |                        |                         |                  |                  |                         |
| 2  |                        |                         |                  |                  |                         |
| 3  | Diabetes               | <b>1.25 (1.21-1.30)</b> | 1.19 (1.15-1.24) | 1.13 (1.09-1.17) | <b>1.13 (1.10-1.17)</b> |
| 4  |                        |                         |                  |                  |                         |
| 5  | Hypothyroidism         | 0.99 (0.91-1.07)        | 1.01 (0.93-1.09) | 1.03 (0.93-1.13) | 1.06 (0.96-1.17)        |
| 6  |                        |                         |                  |                  |                         |
| 7  | Liver Disease          | <b>1.90 (1.72-2.10)</b> | 1.86 (1.68-2.06) | 1.99 (1.79-2.21) | <b>2.34 (2.12-2.59)</b> |
| 8  |                        |                         |                  |                  |                         |
| 9  | Dementia               | <b>1.74 (1.63-1.85)</b> | 1.97 (1.86-2.09) | 2.03 (1.91-2.16) | <b>1.96 (1.84-2.09)</b> |
| 10 |                        |                         |                  |                  |                         |
| 11 | Depression             | 1.15 (1.07-1.25)        | 1.18 (1.09-1.28) | 1.19 (1.09-1.30) | 1.16 (1.06-1.28)        |
| 12 |                        |                         |                  |                  |                         |
| 13 | Psychosis              | 1.29 (1.20-1.38)        | 1.36 (1.26-1.46) | 1.14 (0.99-1.31) | 1.43 (1.17-1.76)        |
| 14 |                        |                         |                  |                  |                         |
| 15 | Primary Tumor          | 1.56 (1.49-1.64)        | 1.69 (1.60-1.77) | 1.61 (1.53-1.70) | 1.64 (1.56-1.73)        |
| 16 |                        |                         |                  |                  |                         |
| 17 | Metastatic Malignancy  | 3.47 (3.22-3.74)        | 3.59 (3.33-3.87) | 3.14 (2.90-3.41) | 3.42 (3.17-3.70)        |
| 18 |                        |                         |                  |                  |                         |
| 19 | Paraplegia             | 1.36 (1.24-1.50)        | 1.33 (1.21-1.46) | 1.52 (1.35-1.70) | 1.53 (1.35-1.75)        |
| 20 |                        |                         |                  |                  |                         |
| 21 | Venous Thromboembolism | <b>1.07 (0.98-1.17)</b> | 1.18 (1.07-1.30) | 1.16 (1.03-1.31) | <b>1.40 (1.24-1.58)</b> |
| 22 |                        |                         |                  |                  |                         |

1

2 HR, hazard ratio; CI, confidence interval; COPD, chronic obstructive pulmonary disease

1 Table 3a. Sex-specific risk factors of one-year mortality in the historical cohort (1994-1998).

| Variable              | Women            | Men              | Multiplicative Interaction |
|-----------------------|------------------|------------------|----------------------------|
|                       | HR (95% CI)      | HR (95% CI)      | P-Value*                   |
| Age Category          |                  |                  |                            |
| 40-64 years           | Reference        | Reference        | 0.004                      |
| 65-74 years           | 1.45 (1.32-1.59) | 1.63 (1.51-1.75) |                            |
| 75-84 years           | 2.06 (1.89-2.24) | 2.42 (2.25-2.60) |                            |
| > 85 years            | 3.53 (3.24-3.85) | 3.70 (3.41-4.00) |                            |
| Benign Hypertension   | 0.70 (0.67-0.73) | 0.82 (0.79-0.86) | <0.001                     |
| Myocardial Infarction | 1.26 (1.16-1.36) | 1.02 (0.95-1.10) | <0.001                     |
| COPD/Asthma           | 1.10 (1.05-1.16) | 1.20 (1.15-1.25) | 0.01                       |
| Renal Disease         | 2.26 (2.04-2.50) | 1.90 (1.74-2.07) | 0.01                       |
| Diabetes              | 1.31 (1.25-1.38) | 1.20 (1.14-1.26) | 0.01                       |

2  
3 HR, hazard ratio; CI, confidence interval; COPD; chronic obstructive pulmonary disease

4 \* Multiplicative interaction terms were formed by multiplying sex by each of the covariates in the multivariable Cox  
5 proportional hazard model for one-year mortality. Only significant interaction terms (i.e., ones demonstrating sex-  
6 specific risk factors) were reported in this table.

1 Table 3b. Sex-specific risk factors of one-year mortality in the modern cohort (2009-2013).

| Variable                    | Women            | Men              | Multiplicative Interaction |
|-----------------------------|------------------|------------------|----------------------------|
|                             | HR (95% CI)      | HR (95% CI)      | P-Value *                  |
| Income Quintile             |                  |                  |                            |
| 1 (Low)                     | 1.02 (0.94-1.09) | 1.15 (1.06-1.23) | 0.001                      |
| 2                           | 0.97 (0.90-1.05) | 1.10 (1.02-1.18) |                            |
| 3                           | 0.99 (0.92-1.07) | 0.98 (0.91-1.06) |                            |
| 4                           | 1.01 (0.93-1.09) | 1.01 (0.93-1.08) |                            |
| 5 (High)                    | Reference        | Reference        |                            |
| Myocardial Infarction       | 1.05 (0.98-1.12) | 0.94 (0.89-1.00) | 0.02                       |
| Peripheral Arterial Disease | 1.48 (1.32-1.66) | 1.25 (1.14-1.37) | 0.02                       |
| COPD/Asthma                 | 1.12 (1.07-1.17) | 1.23 (1.17-1.29) | 0.005                      |
| Dementia                    | 1.87 (1.72-2.02) | 2.10 (1.92-2.30) | 0.05                       |
| Primary Tumor               | 1.44 (1.34-1.56) | 1.79 (1.68-1.91) | <0.001                     |
| Metastatic Malignancy       | 3.05 (2.75-3.38) | 3.85 (3.49-4.26) | <0.001                     |

2  
3 HR, hazard ratio; CI, confidence interval; COPD; chronic obstructive pulmonary disease

4 \* Multiplicative interaction terms were formed by multiplying sex by each of the covariates in the multivariable Cox  
5 proportional hazard model for one-year mortality. Only significant interaction terms (i.e., ones demonstrating sex-  
6 specific risk factors) were reported in this table.  
7 ed in this table.

1  
2  
3  
4  
5  
6  
7  
8  
9  
10  
11  
12  
13  
14  
15  
16  
17  
18  
19  
20  
21  
22  
23  
24  
25  
26  
27  
28  
29  
30  
31  
32  
33  
34  
35  
36  
37  
38  
39  
40  
41  
42  
43  
44  
45  
46  
47  
48  
49  
50  
51  
52  
53  
54  
55  
56  
57  
58  
59  
60

For peer review only

**SUPPLEMENTAL MATERIAL**

eFigure 1. Sex-specific temporal trends in heart failure hospitalizations within one year of ambulatory heart failure diagnosis. Hospitalization rates were directly standardized by age using the 1991 Canadian population aged  $\geq 40$  years as the reference population and expressed per 1000 person-years.

Legend: The solid line represents trends in women. The dotted line represents trends in men.

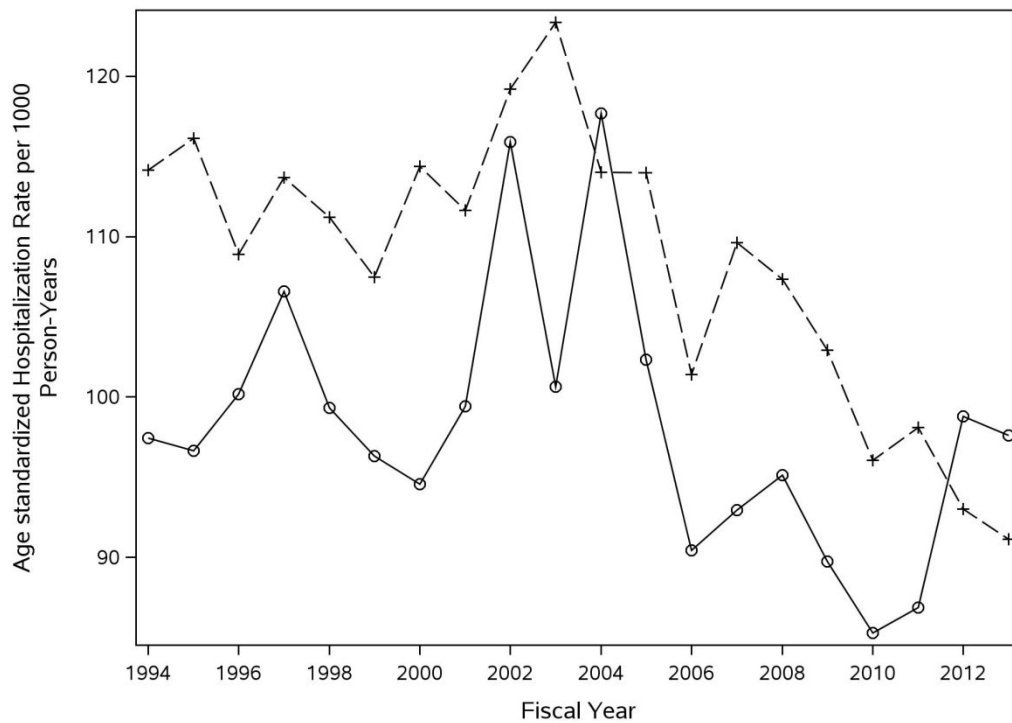

1

2

3

4

5

6

7

8

9

10

11

12

13

14

15

16

17

18

19

20

21

22

23

24

25

26

27

28

29

30

31

32

33

34

35

36

37

38

39

40

41

42

43

44

45

46

47

48

49

50

51

52

53

54

55

56

57

58

59

60

eFigure 2a. Stacked cumulative incidence curves representing temporal trends of heart failure hospitalization within one year of diagnosis in men.

Legend: The red line represents cumulative incidence of hospitalization in the historical cohort (1994-1998). The blue line represents hospitalizations in the 1999-2003 cohort. The orange line represents hospitalizations in the 2004-2008 cohort. The green line (which is nearly superimposed on the blue line) represents hospitalizations in the modern cohort (2009-2013).

Probability of Hospitalization

Time (days)

eFigure 2a. Stacked cumulative incidence curves representing temporal trends of heart failure hospitalization within one year of diagnosis in women.

Legend: The red line represents cumulative incidence of hospitalization in the historical cohort (1994-1993). The blue line represents hospitalizations in the 1999-2003 cohort. The orange line represents hospitalizations in the 2004-2008 cohort. The green line represents hospitalizations in the modern cohort (2009-2013).

Probability of Hospitalization

Time (days)

Table 1. Crude and age standardized incidence rates of ambulatory heart failure per 100,000 population.

| Year | Sex    | HF Cases | Denominator | Incidence Rate |              | 95% CI |        |
|------|--------|----------|-------------|----------------|--------------|--------|--------|
|      |        |          |             | Crude          | Standardized | Lower  | Upper  |
| 1994 | Female | 10123    | 2544992     | 397.76         | 368.95       | 361.74 | 376.27 |
|      | Male   | 8998     | 2290949     | 392.76         | 480.63       | 470.55 | 490.88 |
| 1995 | Female | 9502     | 2615417     | 363.31         | 335.99       | 329.21 | 342.88 |
|      | Male   | 8622     | 2359605     | 365.40         | 445.26       | 435.73 | 454.95 |
| 1996 | Female | 9312     | 2686591     | 346.61         | 319.55       | 313.03 | 326.18 |
|      | Male   | 8621     | 2430438     | 354.71         | 430.39       | 421.20 | 439.74 |
| 1997 | Female | 9518     | 2753376     | 345.68         | 319.39       | 312.93 | 325.94 |
|      | Male   | 8939     | 2497920     | 357.86         | 433.52       | 424.43 | 442.76 |
| 1998 | Female | 9221     | 2815590     | 327.50         | 303.76       | 297.52 | 310.10 |
|      | Male   | 8727     | 2560459     | 340.84         | 411.86       | 403.12 | 420.74 |
| 1999 | Female | 9158     | 2880244     | 317.96         | 294.91       | 288.82 | 301.09 |
|      | Male   | 8810     | 2624357     | 335.70         | 403.94       | 395.42 | 412.61 |
| 2000 | Female | 8921     | 2948815     | 302.53         | 279.98       | 274.11 | 285.94 |
|      | Male   | 8548     | 2693918     | 317.31         | 382.41       | 374.22 | 390.74 |
| 2001 | Female | 8466     | 3018031     | 280.51         | 258.26       | 252.69 | 263.91 |
|      | Male   | 8132     | 2763947     | 294.22         | 351.15       | 343.46 | 358.98 |
| 2002 | Female | 8403     | 3088112     | 272.11         | 249.62       | 244.21 | 255.11 |
|      | Male   | 8441     | 2835687     | 297.67         | 353.43       | 345.83 | 361.16 |
| 2003 | Female | 8242     | 3159200     | 260.89         | 237.25       | 232.05 | 242.53 |
|      | Male   | 8177     | 2908486     | 281.14         | 333.06       | 325.78 | 340.45 |
| 2004 | Female | 8082     | 3226254     | 250.51         | 227.56       | 222.51 | 232.70 |
|      | Male   | 8101     | 2976603     | 272.16         | 320.70       | 313.67 | 327.86 |
| 2005 | Female | 8283     | 3286052     | 252.07         | 229.05       | 224.02 | 234.17 |
|      | Male   | 8588     | 3037995     | 282.69         | 328.77       | 321.77 | 335.87 |
| 2006 | Female | 8107     | 3340543     | 242.69         | 220.03       | 215.14 | 225.01 |
|      | Male   | 8774     | 3091317     | 283.83         | 323.41       | 316.60 | 330.32 |
| 2007 | Female | 7993     | 3388916     | 235.86         | 211.27       | 206.53 | 216.09 |
|      | Male   | 8929     | 3136755     | 284.66         | 318.62       | 311.98 | 325.36 |
| 2008 | Female | 8578     | 3437633     | 249.53         | 222.31       | 217.49 | 227.21 |
|      | Male   | 9306     | 3182320     | 292.43         | 322.03       | 315.46 | 328.71 |
| 2009 | Female | 8433     | 3486229     | 241.89         | 213.46       | 208.78 | 218.22 |
|      | Male   | 9312     | 3225967     | 288.66         | 313.38       | 306.98 | 319.87 |
| 2010 | Female | 8366     | 3534061     | 236.72         | 208.36       | 203.77 | 213.03 |
|      | Male   | 9262     | 3269161     | 283.31         | 301.92       | 295.75 | 308.19 |
| 2011 | Female | 8424     | 3578607     | 235.40         | 201.79       | 197.35 | 206.31 |
|      | Male   | 9292     | 3308050     | 280.89         | 294.17       | 288.17 | 300.26 |
| 2012 | Female | 8526     | 3618133     | 235.65         | 199.93       | 195.55 | 204.39 |
|      | Male   | 9585     | 3341596     | 286.84         | 293.47       | 287.58 | 299.45 |
| 2013 | Female | 8997     | 3653530     | 246.25         | 205.83       | 201.43 | 210.30 |
|      | Male   | 10510    | 3369203     | 311.94         | 312.82       | 306.82 | 318.90 |

HF, heart failure; CI, confidence interval



Table 2. Temporal trends of one-year mortality rates in men and women with incident heart failure.

| Time Cohort           | Sex | Number of Deaths | Number of Incident HF Cases | Crude Rate (%) | Age-Standardized Rate (%; 95% CI) |
|-----------------------|-----|------------------|-----------------------------|----------------|-----------------------------------|
| April 1994-March 1999 | F   | 8319             | 47676                       | 17.5           | 10.1 (9.5-10.8)                   |
|                       | M   | 8238             | 43907                       | 18.8           | 11.4 (10.8-11.9)                  |
| April 1999-March 2004 | F   | 7572             | 43190                       | 17.5           | 9.9 (9.3-10.6)                    |
|                       | M   | 7365             | 42108                       | 17.5           | 10.4 (9.9-10.8)                   |
| April 2004-March 2009 | F   | 7148             | 41043                       | 17.4           | 9.5 (9.0-10.1)                    |
|                       | M   | 7322             | 43698                       | 16.8           | 9.8 (9.4-10.2)                    |
| April 2009-March 2014 | F   | 7156             | 42746                       | 16.8           | 8.6 (8.1-9.0)                     |
|                       | M   | 7138             | 47961                       | 14.9           | 8.2 (7.9-8.6)                     |

HF, heart failure; CI, confidence interval

eTable 3. Crude and age-standardized one-year mortality rates following ambulatory heart failure diagnosis. Rates are expressed per 1000 population.

| Year | Sex    | Deaths | Incident HF Cases | Mortality Rate |              | 95% CI |        |
|------|--------|--------|-------------------|----------------|--------------|--------|--------|
|      |        |        |                   | Crude          | Standardized | Lower  | Upper  |
| 1994 | Female | 1733   | 10123             | 171.19         | 104.40       | 90.54  | 119.78 |
|      | Male   | 1710   | 8998              | 190.04         | 123.00       | 110.57 | 136.45 |
| 1995 | Female | 1629   | 9502              | 171.44         | 94.64        | 82.33  | 108.27 |
|      | Male   | 1578   | 8622              | 183.02         | 109.23       | 97.89  | 121.53 |
| 1996 | Female | 1679   | 9312              | 180.30         | 111.88       | 95.19  | 130.64 |
|      | Male   | 1643   | 8621              | 190.58         | 112.37       | 101.72 | 123.83 |
| 1997 | Female | 1674   | 9518              | 175.88         | 90.24        | 78.73  | 102.95 |
|      | Male   | 1741   | 8939              | 194.76         | 116.99       | 105.34 | 129.56 |
| 1998 | Female | 1604   | 9221              | 173.95         | 105.45       | 92.82  | 119.32 |
|      | Male   | 1566   | 8727              | 179.44         | 105.22       | 94.57  | 116.74 |
| 1999 | Female | 1527   | 9158              | 166.74         | 90.75        | 78.76  | 104.04 |
|      | Male   | 1522   | 8810              | 172.76         | 103.32       | 93.50  | 113.88 |
| 2000 | Female | 1556   | 8921              | 174.42         | 106.23       | 92.32  | 121.65 |
|      | Male   | 1489   | 8548              | 174.19         | 100.59       | 90.80  | 111.15 |
| 2001 | Female | 1473   | 8466              | 173.99         | 91.60        | 79.23  | 105.34 |
|      | Male   | 1364   | 8132              | 167.73         | 103.48       | 92.72  | 115.15 |
| 2002 | Female | 1504   | 8403              | 178.98         | 105.15       | 91.98  | 119.68 |
|      | Male   | 1511   | 8441              | 179.01         | 105.70       | 96.26  | 115.82 |
| 2003 | Female | 1512   | 8242              | 183.45         | 104.88       | 90.32  | 121.12 |
|      | Male   | 1479   | 8177              | 180.87         | 105.10       | 94.47  | 116.60 |
| 2004 | Female | 1468   | 8082              | 181.64         | 94.64        | 82.57  | 107.97 |
|      | Male   | 1486   | 8101              | 183.43         | 105.57       | 95.67  | 116.22 |
| 2005 | Female | 1445   | 8283              | 174.45         | 96.12        | 83.52  | 110.08 |
|      | Male   | 1454   | 8588              | 169.31         | 98.53        | 88.69  | 109.16 |
| 2006 | Female | 1395   | 8107              | 172.07         | 98.75        | 86.46  | 112.30 |
|      | Male   | 1459   | 8774              | 166.29         | 99.06        | 89.97  | 108.82 |
| 2007 | Female | 1384   | 7993              | 173.15         | 92.81        | 81.59  | 105.15 |
|      | Male   | 1475   | 8929              | 165.19         | 93.86        | 85.68  | 102.61 |
| 2008 | Female | 1456   | 8578              | 169.74         | 92.93        | 82.04  | 104.86 |
|      | Male   | 1448   | 9306              | 155.60         | 94.08        | 85.56  | 103.21 |
| 2009 | Female | 1464   | 8433              | 173.60         | 89.43        | 79.65  | 100.09 |
|      | Male   | 1461   | 9312              | 156.89         | 88.17        | 80.01  | 96.95  |
| 2010 | Female | 1373   | 8366              | 164.12         | 86.81        | 76.58  | 98.03  |
|      | Male   | 1396   | 9262              | 150.72         | 81.93        | 74.92  | 89.43  |
| 2011 | Female | 1418   | 8424              | 168.33         | 81.54        | 71.43  | 92.68  |
|      | Male   | 1381   | 9292              | 148.62         | 82.13        | 74.91  | 89.87  |
| 2012 | Female | 1404   | 8526              | 164.67         | 85.48        | 75.84  | 96.01  |
|      | Male   | 1377   | 9585              | 143.66         | 76.53        | 69.60  | 83.97  |
| 2013 | Female | 1497   | 8997              | 166.39         | 84.84        | 75.24  | 95.32  |
|      | Male   | 1523   | 10510             | 144.91         | 82.99        | 75.34  | 91.22  |

CI, confidence interval

eTable 4. Crude and age standardized one-year heart failure hospitalization rates in patients who were diagnosed with heart failure in an ambulatory setting between 1994-2013. Rate is expressed per 1000 person years.

| Year | Sex    | Heart Failure    |             | Hospitalization Rate |              | 95% CI |        |
|------|--------|------------------|-------------|----------------------|--------------|--------|--------|
|      |        | Hospitalizations | Denominator | Crude                | Standardized | Lower  | Upper  |
| 1994 | Female | 1105             | 8417.52     | 131.27               | 97.43        | 83.29  | 113.28 |
|      | Male   | 1108             | 7325.60     | 151.25               | 114.15       | 101.01 | 128.52 |
| 1995 | Female | 1067             | 7860.78     | 135.74               | 96.64        | 83.94  | 110.71 |
|      | Male   | 1001             | 7065.84     | 141.67               | 116.14       | 100.74 | 133.23 |
| 1996 | Female | 1065             | 7632.79     | 139.53               | 100.19       | 85.97  | 116.09 |
|      | Male   | 1015             | 7022.96     | 144.53               | 108.91       | 96.08  | 122.98 |
| 1997 | Female | 1028             | 7859.13     | 130.80               | 106.59       | 90.03  | 125.30 |
|      | Male   | 1082             | 7232.55     | 149.60               | 113.69       | 100.95 | 127.59 |
| 1998 | Female | 1006             | 7603.66     | 132.30               | 99.32        | 85.96  | 114.16 |
|      | Male   | 963              | 7180.72     | 134.11               | 111.22       | 97.10  | 126.82 |
| 1999 | Female | 983              | 7607.15     | 129.22               | 96.32        | 82.75  | 111.47 |
|      | Male   | 936              | 7305.04     | 128.13               | 107.48       | 95.17  | 120.95 |
| 2000 | Female | 917              | 7402.64     | 123.87               | 94.57        | 80.28  | 110.67 |
|      | Male   | 994              | 7033.00     | 141.33               | 114.37       | 101.66 | 128.24 |
| 2001 | Female | 903              | 6997.61     | 129.04               | 99.40        | 84.75  | 115.86 |
|      | Male   | 901              | 6711.51     | 134.25               | 111.64       | 97.95  | 126.71 |
| 2002 | Female | 937              | 6838.58     | 137.02               | 115.90       | 100.22 | 133.33 |
|      | Male   | 1007             | 6854.11     | 146.92               | 119.20       | 106.86 | 132.57 |
| 2003 | Female | 994              | 6645.28     | 149.58               | 100.66       | 86.86  | 116.02 |
|      | Male   | 1016             | 6629.94     | 153.24               | 123.36       | 110.31 | 137.54 |
| 2004 | Female | 1002             | 6508.80     | 153.95               | 117.67       | 101.49 | 135.69 |
|      | Male   | 993              | 6504.80     | 152.66               | 114.02       | 102.01 | 127.06 |
| 2005 | Female | 962              | 6775.02     | 141.99               | 102.34       | 88.21  | 118.09 |
|      | Male   | 1026             | 7052.13     | 145.49               | 113.98       | 101.59 | 127.48 |
| 2006 | Female | 982              | 6565.14     | 149.58               | 90.43        | 78.78  | 103.32 |
|      | Male   | 989              | 7237.69     | 136.65               | 101.40       | 90.93  | 112.73 |
| 2007 | Female | 987              | 6493.03     | 152.01               | 92.95        | 81.45  | 105.61 |
|      | Male   | 1069             | 7307.83     | 146.28               | 109.62       | 98.84  | 121.25 |
| 2008 | Female | 1046             | 6963.90     | 150.20               | 95.11        | 83.30  | 108.13 |
|      | Male   | 1097             | 7646.02     | 143.47               | 107.36       | 97.12  | 118.38 |
| 2009 | Female | 1021             | 6841.22     | 149.24               | 89.74        | 79.39  | 101.06 |
|      | Male   | 1085             | 7697.71     | 140.95               | 102.92       | 92.38  | 114.34 |
| 2010 | Female | 1042             | 6799.72     | 153.24               | 85.28        | 75.41  | 96.08  |
|      | Male   | 1078             | 7694.92     | 140.09               | 96.05        | 86.94  | 105.86 |
| 2011 | Female | 1061             | 6842.81     | 155.05               | 86.86        | 76.87  | 97.78  |
|      | Male   | 1038             | 7754.49     | 133.86               | 98.10        | 87.99  | 109.06 |
| 2012 | Female | 1137             | 6895.19     | 164.90               | 98.80        | 87.24  | 111.46 |
|      | Male   | 1097             | 8017.47     | 136.83               | 93.00        | 84.28  | 102.37 |
| 2013 | Female | 1159             | 7269.34     | 159.44               | 97.59        | 86.03  | 110.27 |
|      | Male   | 1205             | 8772.03     | 137.37               | 91.14        | 82.26  | 100.71 |

CI, confidence interval

STROBE Statement—Checklist of items that should be included in reports of *cohort studies*

|                              | Item No | Recommendation                                                                                                                                                                                                                                                                                                         | Page No           |
|------------------------------|---------|------------------------------------------------------------------------------------------------------------------------------------------------------------------------------------------------------------------------------------------------------------------------------------------------------------------------|-------------------|
| <b>Title and abstract</b>    | 1       | (a) Indicate the study's design with a commonly used term in the title or the abstract<br>(b) Provide in the abstract an informative and balanced summary of what was done and what was found                                                                                                                          | Title page<br>2   |
| <b>Introduction</b>          |         |                                                                                                                                                                                                                                                                                                                        |                   |
| Background/rationale         | 2       | Explain the scientific background and rationale for the investigation being reported                                                                                                                                                                                                                                   | 4                 |
| Objectives                   | 3       | State specific objectives, including any prespecified hypotheses                                                                                                                                                                                                                                                       | 4                 |
| <b>Methods</b>               |         |                                                                                                                                                                                                                                                                                                                        |                   |
| Study design                 | 4       | Present key elements of study design early in the paper                                                                                                                                                                                                                                                                | 5                 |
| Setting                      | 5       | Describe the setting, locations, and relevant dates, including periods of recruitment, exposure, follow-up, and data collection                                                                                                                                                                                        | 5                 |
| Participants                 | 6       | (a) Give the eligibility criteria, and the sources and methods of selection of participants. Describe methods of follow-up<br>(b) For matched studies, give matching criteria and number of exposed and unexposed                                                                                                      | 5<br>N/A          |
| Variables                    | 7       | Clearly define all outcomes, exposures, predictors, potential confounders, and effect modifiers. Give diagnostic criteria, if applicable                                                                                                                                                                               | 6                 |
| Data sources/<br>measurement | 8*      | For each variable of interest, give sources of data and details of methods of assessment (measurement). Describe comparability of assessment methods if there is more than one group                                                                                                                                   | 5-6               |
| Bias                         | 9       | Describe any efforts to address potential sources of bias                                                                                                                                                                                                                                                              | 6-7               |
| Study size                   | 10      | Explain how the study size was arrived at                                                                                                                                                                                                                                                                              | 5                 |
| Quantitative variables       | 11      | Explain how quantitative variables were handled in the analyses. If applicable, describe which groupings were chosen and why                                                                                                                                                                                           | 6-7               |
| Statistical methods          | 12      | (a) Describe all statistical methods, including those used to control for confounding<br>(b) Describe any methods used to examine subgroups and interactions<br>(c) Explain how missing data were addressed<br>(d) If applicable, explain how loss to follow-up was addressed<br>(e) Describe any sensitivity analyses | 6-7               |
| <b>Results</b>               |         |                                                                                                                                                                                                                                                                                                                        |                   |
| Participants                 | 13*     | (a) Report numbers of individuals at each stage of study—eg numbers potentially eligible, examined for eligibility, confirmed eligible, included in the study, completing follow-up, and analysed<br>(b) Give reasons for non-participation at each stage<br>(c) Consider use of a flow diagram                        | 7<br>7<br>N/A     |
| Descriptive data             | 14*     | (a) Give characteristics of study participants (eg demographic, clinical, social) and information on exposures and potential confounders<br>(b) Indicate number of participants with missing data for each variable of interest<br>(c) Summarise follow-up time (eg, average and total amount)                         | 8<br>Table 1<br>8 |
| Outcome data                 | 15*     | Report numbers of outcome events or summary measures over time                                                                                                                                                                                                                                                         | 8-10              |
| Main results                 | 16      | (a) Give unadjusted estimates and, if applicable, confounder-adjusted estimates and their                                                                                                                                                                                                                              | 8-10              |

|    |                          |                                                                                           |       |
|----|--------------------------|-------------------------------------------------------------------------------------------|-------|
| 1  |                          | precision (eg, 95% confidence interval). Make clear which confounders were adjusted for   |       |
| 2  |                          | and why they were included                                                                |       |
| 3  |                          | (b) Report category boundaries when continuous variables were categorized                 | Table |
| 4  |                          |                                                                                           | 1     |
| 5  |                          | (c) If relevant, consider translating estimates of relative risk into absolute risk for a |       |
| 6  |                          | meaningful time period                                                                    | N/A   |
| 7  |                          |                                                                                           |       |
| 8  | Other analyses           | 17 Report other analyses done—eg analyses of subgroups and interactions, and sensitivity  | N/A   |
| 9  |                          | analyses                                                                                  |       |
| 10 |                          |                                                                                           |       |
| 11 | <b>Discussion</b>        |                                                                                           |       |
| 12 | Key results              | 18 Summarise key results with reference to study objectives                               | 11    |
| 13 | Limitations              | 19 Discuss limitations of the study, taking into account sources of potential bias or     | 15    |
| 14 |                          | imprecision. Discuss both direction and magnitude of any potential bias                   |       |
| 15 |                          |                                                                                           |       |
| 16 | Interpretation           | 20 Give a cautious overall interpretation of results considering objectives, limitations, | 11-15 |
| 17 |                          | multiplicity of analyses, results from similar studies, and other relevant evidence       |       |
| 18 |                          |                                                                                           |       |
| 19 | Generalisability         | 21 Discuss the generalisability (external validity) of the study results                  | 15    |
| 20 |                          |                                                                                           |       |
| 21 | <b>Other information</b> |                                                                                           |       |
| 22 | Funding                  | 22 Give the source of funding and the role of the funders for the present study and, if   | 16-17 |
| 23 |                          | applicable, for the original study on which the present article is based                  |       |

\*Give information separately for exposed and unexposed groups.

**Note:** An Explanation and Elaboration article discusses each checklist item and gives methodological background and published examples of transparent reporting. The STROBE checklist is best used in conjunction with this article (freely available on the Web sites of PLoS Medicine at <http://www.plosmedicine.org/>, Annals of Internal Medicine at <http://www.annals.org/>, and Epidemiology at <http://www.epidem.com/>). Information on the STROBE Initiative is available at <http://www.strobe-statement.org>.

# BMJ Open

## Sex-Specific Temporal Trends in Ambulatory Heart Failure Incidence, Mortality and Hospitalization in Ontario, Canada from 1994-2013 – a Population-Based Cohort Study

|                                 |                                                                                                                                                                                                                                                                                                                                                                                                                                                                                                                                                                                                                                                                                                                                                                  |
|---------------------------------|------------------------------------------------------------------------------------------------------------------------------------------------------------------------------------------------------------------------------------------------------------------------------------------------------------------------------------------------------------------------------------------------------------------------------------------------------------------------------------------------------------------------------------------------------------------------------------------------------------------------------------------------------------------------------------------------------------------------------------------------------------------|
| Journal:                        | <i>BMJ Open</i>                                                                                                                                                                                                                                                                                                                                                                                                                                                                                                                                                                                                                                                                                                                                                  |
| Manuscript ID                   | bmjopen-2020-044126.R1                                                                                                                                                                                                                                                                                                                                                                                                                                                                                                                                                                                                                                                                                                                                           |
| Article Type:                   | Original research                                                                                                                                                                                                                                                                                                                                                                                                                                                                                                                                                                                                                                                                                                                                                |
| Date Submitted by the Author:   | 07-Oct-2020                                                                                                                                                                                                                                                                                                                                                                                                                                                                                                                                                                                                                                                                                                                                                      |
| Complete List of Authors:       | Sun, Louise; University of Ottawa Heart Institute, Division of Cardiac Anesthesiology; Institute for Clinical Evaluative Sciences, Mielniczuk, Lisa; University of Ottawa Heart Institute<br>Liu, Peter; University of Ottawa Heart Institute, Division of Cardiology<br>Beanlands, Rob; University of Ottawa Heart Institute, Division of Cardiology<br>Chih, Sharon; University of Ottawa Heart Institute, Division of Cardiology<br>Davies, Ross; University of Ottawa Heart Institute, Division of Cardiology<br>Coutinho, Thais; University of Ottawa Heart Institute<br>Lee, Douglas; University of Toronto, Medicine<br>Austin, Peter; University of Toronto<br>Bader Eddeen, Anan; Institute for Clinical Evaluative Sciences,<br>Tu, Jack; ICES Toronto |
| <b>Primary Subject Heading</b>: | Cardiovascular medicine                                                                                                                                                                                                                                                                                                                                                                                                                                                                                                                                                                                                                                                                                                                                          |
| Secondary Subject Heading:      | Cardiovascular medicine                                                                                                                                                                                                                                                                                                                                                                                                                                                                                                                                                                                                                                                                                                                                          |
| Keywords:                       | Cardiac Epidemiology < CARDIOLOGY, Heart failure < CARDIOLOGY, EPIDEMIOLOGY                                                                                                                                                                                                                                                                                                                                                                                                                                                                                                                                                                                                                                                                                      |
|                                 |                                                                                                                                                                                                                                                                                                                                                                                                                                                                                                                                                                                                                                                                                                                                                                  |

SCHOLARONE™  
Manuscripts



I, the Submitting Author has the right to grant and does grant on behalf of all authors of the Work (as defined in the below author licence), an exclusive licence and/or a non-exclusive licence for contributions from authors who are: i) UK Crown employees; ii) where BMJ has agreed a CC-BY licence shall apply, and/or iii) in accordance with the terms applicable for US Federal Government officers or employees acting as part of their official duties; on a worldwide, perpetual, irrevocable, royalty-free basis to BMJ Publishing Group Ltd ("BMJ") its licensees and where the relevant Journal is co-owned by BMJ to the co-owners of the Journal, to publish the Work in this journal and any other BMJ products and to exploit all rights, as set out in our [licence](#).

The Submitting Author accepts and understands that any supply made under these terms is made by BMJ to the Submitting Author unless you are acting as an employee on behalf of your employer or a postgraduate student of an affiliated institution which is paying any applicable article publishing charge ("APC") for Open Access articles. Where the Submitting Author wishes to make the Work available on an Open Access basis (and intends to pay the relevant APC), the terms of reuse of such Open Access shall be governed by a Creative Commons licence – details of these licences and which [Creative Commons](#) licence will apply to this Work are set out in our licence referred to above.

Other than as permitted in any relevant BMJ Author's Self Archiving Policies, I confirm this Work has not been accepted for publication elsewhere, is not being considered for publication elsewhere and does not duplicate material already published. I confirm all authors consent to publication of this Work and authorise the granting of this licence.

1 **Title:** Sex-Specific Temporal Trends in Ambulatory Heart Failure Incidence, Mortality and  
2 Hospitalization in Ontario, Canada from 1994-2013 – a Population-Based Cohort Study

3  
4 **Authors:** Louise Y. Sun\* MD SM,<sup>a,b,c</sup> Lisa M. Mielniczuk\* MD MSc,<sup>d</sup> Peter P. Liu MD,<sup>d</sup> Rob  
5 Beanlands MD,<sup>d</sup> Sharon Chih MBBS PhD,<sup>d</sup> Ross Davies MD,<sup>d</sup> Thais Coutinho MD,<sup>d,e</sup> Douglas S.  
6 Lee MD PhD,<sup>b,f</sup> Peter C. Austin PhD,<sup>b</sup> Anan Bader Eddeen MSc,<sup>b</sup> Jack V. Tu\*\* MD PhD<sup>b,g</sup>

7  
8 **Affiliations:**

9 <sup>a</sup> Division of Cardiac Anesthesiology, Department of Anesthesiology and Pain Medicine,  
10 University of Ottawa Heart Institute

11 <sup>b</sup> ICES (formerly the Institute for Clinical Evaluative Sciences)

12 <sup>c</sup> School of Epidemiology and Public Health, University of Ottawa

13 <sup>d</sup> Division of Cardiology, Department of Medicine, University of Ottawa Heart Institute

14 <sup>e</sup> Division of Prevention and Rehabilitation, University of Ottawa Heart Institute

15 <sup>f</sup> Peter Munk Cardiac Centre, University Health Network, University of Toronto

16 <sup>g</sup> Sunnybrook Schulich Heart Centre, University of Toronto

17 \* Co-primary authors

18 \*\* Dr. Tu is deceased

19  
20 **Address for Correspondence:**

21 Louise Y. Sun, MD SM FRCPC FAHA

22 Clinician Scientist and Associate Professor

23 Room H2410, 40 Ruskin Street, Ottawa, ON K1Y 4W7

24 Phone: 1 613 696 7381 Email: [lsun@ottawaheart.ca](mailto:lsun@ottawaheart.ca)



**ABSTRACT**

**Objectives:** To examine the temporal trends in mortality and heart failure (HF) hospitalization in ambulatory patients following a new diagnosis of HF.

**Design:** Retrospective cohort study

**Setting:** Outpatient

**Participants:** Ontario residents who were diagnosed with HF in an outpatient setting between 1994-2013.

**Primary and Secondary Outcome Measures:** The primary outcome was all-cause mortality within one year of diagnosis and the secondary outcome was HF hospitalization within one year. Risks of mortality and hospitalization were calculated using the Kaplan-Meier method and the relative hazard of death was assessed using multivariable Cox proportional hazard models.

**Results:** A total of 352,329 patients were studied (50% female). During the study period, there was a greater decline in age standardized one-year mortality rates (AMR) in men (33%) than in women (19%). Specifically, female AMR at one-year was 10.4% (95% CI, 9.1-12.0) in 1994 and 8.5% (7.5-9.5) in 2013, and male AMR at one-year was 12.3% (11.1-13.7) in 1994 and 8.3% (7.5-9.1) in 2013. Conversely, age standardized HF hospitalization rates declined in men (11.4% [10.1-12.9] in 1994 and 9.1% [8.2-10.1] in 2013) but remained unchanged in women (9.7% [8.3-11.3] in 1994 and 9.8% [8.6-11.0] in 2013).

**Conclusion:** Among patients with HF over a 20-year period, there was a greater improvement in the prognosis of men compared to women. Further research should focus on the determinants of this disparity and ways to reduce this gap in outcomes.

1  
2  
3 1 **Strengths and Limitations:**  
4

- 5 2 - First and largest population-based study to examine temporal, sex-specific trends in heart  
6 failure (HF) outcomes in an ambulatory setting.  
7  
8 3  
9  
10 4 - The nature of our publicly funded healthcare system allowed for analysis of all patients  
11 diagnosed with HF in Ontario without selection bias.  
12  
13 5  
14  
15 6 - Information on ejection fraction was not available in the databases used.  
16  
17 7  
18  
19 8  
20

21 9 **Key Words:** heart failure, mortality, hospitalization, women, epidemiology, prognosis  
22  
23 10  
24 11  
25 12

26 13 **No Data Availability Statement:** The dataset from this study is held securely in coded form at  
27 ICES (formerly the Institute for Clinical Evaluative Sciences).  
28  
29  
30  
31  
32  
33  
34  
35  
36  
37  
38  
39  
40  
41  
42  
43  
44  
45  
46  
47  
48  
49  
50  
51  
52  
53  
54  
55  
56  
57  
58  
59  
60

## 1 Introduction

2 Heart failure (HF) is a significant cause of morbidity and mortality for both women and  
3 men <sup>1,2</sup>. Despite the current era of guideline directed medical therapy, HF continues to be a  
4 leading cause of admission to hospital. It is associated with a poor prognosis and contributes to  
5 35% of cardiovascular mortality in women <sup>3</sup>. Despite this, HF remains poorly understood in  
6 women, and women continue to be underrepresented in HF clinical trials <sup>4</sup>. The underlying  
7 mechanism of HF is often different in women and men, with women suffering more often from  
8 HF of a hypertensive rather than ischemic etiology <sup>5,6</sup>. Important trends in the incidence and  
9 outcomes of hospitalized HF patients have been recently published <sup>7,8</sup>; these studies suggest that  
10 the incidence of HF has declined in many inpatient cohorts, however the prognosis of this disease  
11 remains poor. An in-depth understanding of the temporal trends in HF incidence and outcomes is  
12 also needed in the ambulatory setting, where the majority of HF cases are diagnosed and  
13 managed. Also, given the sex differences in co-morbidities and outcomes in HF, it is not known  
14 if these temporal changes are modified by sex. We therefore examined the sex differences in HF  
15 co-morbidities, incidence, mortality and hospitalization in a population-based ambulatory cohort  
16 from fiscal years 1994 to 2013.

## 1 **Methods**

### 2 **Design and Study Population**

3 We conducted a population-based, retrospective cohort study of Ontario residents who  
4 were diagnosed with HF in an outpatient setting over a 20-year period, using linked  
5 administrative databases. The Research Ethics Board of Sunnybrook Health Sciences, Toronto,  
6 Canada approved this study and waived the need for informed consent.

7 Included were adult patients  $\geq 40$  years of age, who were newly diagnosed with HF in an  
8 ambulatory setting between April 1, 1994 and March 31, 2014. We excluded non-Ontario  
9 residents, those who were  $\geq 105$  years of age on the date of HF diagnosis, those who were  
10 diagnosed with HF in an inpatient setting and in whom HF had developed as a post-admission  
11 complication. Ontario is Canada's most populous and ethnically diverse province with a public  
12 funded healthcare system that reimburses all medically necessary physician and hospital services.

### 13 **Patient and Public Involvement**

14 Patients and the public were not involved in the design and conception of this study.  
15 However, the results will be publicly disseminated.

### 16 **Data Sources**

17 Databases were linked deterministically using unique encoded identifiers. Ambulatory  
18 incident HF cases were identified using the ICES Congestive Heart Failure database, based on  
19 two outpatient billing claims for HF within one year. This algorithm was validated in primary  
20 care patient records and shown to have 85% sensitivity and 97% specificity in identifying HF  
21 events<sup>9</sup>. The Congestive Heart Failure database allowed us to study a validated cohort of HF  
22 patients with consistent entry criteria over time. Our analyses were conducted by linking the  
23 Congestive Heart Failure database with the Registered Persons Database, which contains  
24 demographic and vital statistics information, the Canadian Institute for Health Information

1 Discharge Abstract Database, which contains data on all hospitalizations and co-morbidities, and  
2  
3 Same Day Surgery database for co-morbidities. Physician fee-for-service claims data was  
4  
5 obtained from the Ontario Health Insurance Plan database. While lacking physiologic and  
6  
7 laboratory measures, these databases have been validated for many outcomes, exposures, and co-  
8  
9 morbidity<sup>10-13</sup>.

## 10 **Outcome**

11 The primary outcome was all-cause mortality within one year of HF diagnosis. Mortality  
12  
13 was ascertained by using the Registered Persons Database. Secondary outcome was HF  
14  
15 hospitalization within one year of HF diagnosis, which was ascertained using the Discharge  
16  
17 Abstract Database.

## 18 **Covariates**

19 Demographic variables were obtained from the Registered Persons Database. We  
20  
21 estimated socioeconomic status based on patients' neighborhood median income in the Canadian  
22  
23 census, and determined rural versus urban residence using Statistics Canada definitions<sup>14</sup>. We  
24  
25 identified hypertension<sup>10</sup>, asthma<sup>15</sup>, chronic obstructive pulmonary disease (COPD)<sup>16</sup> and  
26  
27 diabetes mellitus<sup>12</sup> using validated algorithms applied on patient encounters within five years of  
28  
29 HF diagnosis. Other co-morbidities were identified using Discharge Abstract Database, Same  
30  
31 Day Surgery and Ontario Health Insurance Plan databases based on International Classification  
32  
33 of Diseases 10<sup>th</sup> Revision codes within five years of HF diagnosis, using previously described  
34  
35 methods<sup>17-29</sup>. Frailty was identified using the Johns Hopkins Adjusted Clinical Groups frailty-  
36  
37 defining diagnoses indicator, which is an instrument designed and validated for research of  
38  
39 frailty-related outcomes and resource utilization using administrative data<sup>25, 28, 30-34</sup>.

## 40 **Statistical Analysis**

1  
2  
3 1 Analyses were stratified by sex. Continuous variables were expressed as mean (standard  
4  
5 2 deviation) and categorical variables as number (proportion). Mortality was assessed at one-year  
6  
7 3 post HF diagnosis. Survival time was defined as the date of HF diagnosis until date of death or  
8  
9 4 last follow up. Patients were censored when they lost possession of a valid Ontario health  
10  
11 5 insurance number for two consecutive eligibility quarters (i.e., have left the province of Ontario).  
12  
13 6 Probability of death within given durations of follow-up were calculated using the Kaplan-Meier  
14  
15 7 method, with the significance of the difference between sexes assessed using the log-rank test.  
16  
17 8 We estimated the cumulative incidence of HF hospitalizations using cumulative incidence  
18  
19 9 functions (CIF), which treated death as a competing risk. We constructed age standardized plots  
20  
21 10 of HF incidence, one-year mortality and HF hospitalization in men and women over the 20-year  
22  
23 11 period. These rates were directly standardized by age using the 1991 Canadian population aged  $\geq$   
24  
25 12 40 years as the reference population.

26  
27 13 We used linear regression with fiscal year as the independent variable to assess for  
28  
29 14 temporal changes in HF incidence and outcomes in women and men across the 20-year period.  
30  
31 15 To examine the temporal changes in co-morbidities, we divided the 20-year period into 4  
32  
33 16 temporal cohorts: those diagnosed with HF between April 1, 1994 – March 31, 1999 (the  
34  
35 17 historical cohort), between April 1, 1999 – March 31, 2004, between April 1, 2004 – March 31,  
36  
37 18 2009 and between April 1, 2009 – March 31, 2014 (the modern cohort). The hazard of death in  
38  
39 19 the historical cohort and the modern cohort were assessed using Cox proportional hazard models  
40  
41 20 with and without multivariable adjustment. To justify sex-specific analyses, we also tested for the  
42  
43 21 presence of any interaction between sex and each of the mortality risk factors in these two  
44  
45 22 cohorts using multiplicative interaction terms. The measure of association was hazard ratios (HR)  
46  
47 23 with 95% CI. Analyses were performed using SAS 9.4 (SAS Institute, Cary, NC), with statistical  
48  
49 24 significance defined by a two-sided P-value of  $< 0.05$ .

## 1 **Results**

2 Over a 20-year period in Ontario, a total of 352,329 patients were diagnosed with HF in  
3 an ambulatory setting (50% women). There were 91,583 incident HF cases in the historical  
4 cohort (52% women) and 90,707 in the modern cohort (47% women). Throughout the study  
5 period, women with HF were more likely to be older, more frail, of lower income status, have co-  
6 morbid conditions such as hypertension, hypothyroidism, anemia, dementia and depression, but  
7 were less likely to have myocardial infarction (MI), peripheral arterial disease, diabetes and  
8 alcohol abuse compared to men (Table 1). Compared to the historical cohort, modern HF patients  
9 were less likely to have peripheral and cerebral vascular disease, psychosis, paraplegia and  
10 venous thromboembolic disease; but more likely to be urban dwellers, have hypertension, atrial  
11 fibrillation, MI, valvular heart disease, pulmonary circulatory disorder, COPD/asthma, alcohol  
12 abuse, renal disease, and are increasingly frail.

### 13 **Trends in HF Incidence**

14 During the historical period (1994-1998), a total of 47,676 (0.36%) incident HF cases  
15 were identified in women and 43,907 (0.36%) in men. During the modern era (2009-2013),  
16 42,746 (0.24%) incident cases were identified in women and 47,961 (0.29%) in men. Although  
17 the incidence of HF declined in both sexes over the 20-year period (linear regression slope,  
18 -0.031;  $p < 0.0001$  in women and -0.025;  $p < 0.0001$  in men), it remained higher in men than in  
19 women (Figure 1). Age standardized incidence for women decreased from 369.0 (95% CI, 361.7-  
20 376.3) per 100,000 population in 1994 to 205.8 (201.4-210.3) in 2013. For men, HF incidence  
21 decreased from 480.6 (470.6-490.9) per 100,000 in 1994 to 312.8 (306.8-318.9) in 2013 (eTable  
22 1).

### 23 **Trends in Mortality**

1  
2  
3 1 One-year mortality occurred in 8,319 (17.5%) women and 8,238 (18.8%) men during the  
4  
5 2 historical period; it occurred in 7,156 (16.8%) women and 7,138 (14.9%) men during the modern  
6  
7 3 period (eTable 2). These survival patterns are reinforced by the Kaplan-Meier survival curves in  
8  
9 4 Figure 2, as well as the stacked Kaplan-Meier curves in Figure 3 that demonstrate an  
10  
11 5 improvement in male survival (linear regression slope, -0.020;  $p < 0.0001$ ) but relatively little  
12  
13 6 change in female survival over time (linear regression slope, -0.010;  $p = 0.001$ ). Age-standardized  
14  
15 7 one-year mortality rates (AMR) also declined in both sexes but the magnitude of reduction was  
16  
17 8 greater in men than in women. Men had higher AMR than women at most time points prior to  
18  
19 9 2009 (Figure 4). Specifically, the female AMR was 10.4% (95% CI, 9.1-12.0) in 1994 and 8.5%  
20  
21 10 (7.5-9.5) in 2013, representing a 19% reduction. Conversely, male AMR was 12.3% (11.1-13.7)  
22  
23 11 in 1994 and 8.3% (7.5-9.1) in 2013, representing a 33% reduction (eTable 3).  
24  
25  
26  
27

28 12 In the unadjusted analysis, female sex was protective against one-year mortality in the  
29  
30 13 historical cohort (unadjusted HR 0.93, 95% CI 0.90-0.95) but was associated with a higher risk of  
31  
32 14 mortality (unadjusted HR 1.14, 95% CI 1.10-1.18) in the modern cohort. Adjusted analysis  
33  
34 15 demonstrated that the protective effect conferred by female sex had diminished over time  
35  
36 16 (adjusted HR 0.85, 95% CI 0.82-0.88 in the historical and 0.97, 95% CI 0.93-1.00 in the modern  
37  
38 17 cohort).  
39  
40  
41

42 18 Table 2 lists the multivariable predictors of one-year mortality in the modern cohort.  
43  
44 19 Compared to the historical cohort, the mortality risk associated with age > 75 years, liver disease,  
45  
46 20 dementia and venous thromboembolism had increased while the risk associated with male sex,  
47  
48 21 complicated hypertension, diabetes, renal disease and pulmonary circulatory disease had  
49  
50 22 diminished. Of note, alcohol abuse and venous thromboembolism emerged as new mortality risk  
51  
52 23 factors while urban residence and MI were no longer risk factors.  
53  
54  
55  
56  
57



1  
2  
3 1 Sex-specific mortality risk factors have evolved over time. Table 3a and 3b illustrate the  
4  
5 2 sex-specific HRs in the historical and modern cohorts, respectively. In the modern cohort, low  
6  
7 3 income was associated with a higher risk of mortality in men but not in women. Conversely, MI  
8  
9 4 had a mild protective effect on men but not in women. In addition, women with peripheral  
10  
11 5 arterial disease had a higher risk of death while men with COPD/asthma, dementia, primary and  
12  
13 6 metastatic malignancies had a higher risk of mortality than women with similar co-morbidities.  
14  
15 7 Compared to the historical cohort, most sex-specific risk factors have evolved over time, with the  
16  
17 8 exception of COPD/asthma.  
18  
19  
20

### 21 9 **Trends in HF Hospitalization**

22  
23  
24 10 HF hospitalizations occurred in 5,271 (13.4%) women and 5,169 (14.4%) men within  
25  
26 11 one-year of HF diagnosis in the historical cohort. During the modern period, there were 5,420  
27  
28 12 (15.6%) HF hospitalizations in women and 5,503 (13.8%) hospitalizations in men. Age-  
29  
30 13 standardized HF hospitalization rates declined in men (linear regression slope, -0.010; p=0.0002)  
31  
32 14 but remained unchanged in women (linear regression slope, -0.005; p=0.11) during the 20-year  
33  
34 15 period (eFigure 1 and eTable 4). Specifically, male age-standardized HF hospitalization rates  
35  
36 16 were 11.4% (95% CI, 10.1-12.9) in 1994 and 9.1% (8.2-10.1) in 2013. Female rates were 9.7%  
37  
38 17 (8.3-11.3) in 1994 and 9.8% (8.6-11.0) in 2013. The temporal trends in the cumulative incidence  
39  
40 18 of HF hospitalizations are illustrated in eFigure 2.  
41  
42  
43  
44  
45  
46  
47  
48  
49  
50  
51  
52  
53  
54  
55  
56  
57  
58  
59  
60

## 1 Discussion

2 This population-based study evaluated 352,329 individuals with a first-time diagnosis of  
3 HF from 1994-2013 in the ambulatory care setting. There are four main findings reported in this  
4 study: 1) HF mortality declined over time 2) The reduction in mortality is greater in men than in  
5 women. 3) Rates of hospitalization decreased for men but remained unchanged for women. 4)  
6 The incidence and significance of co-morbidities associated with HF have changed over time,  
7 and suggest that women continue to experience a greater burden of co-morbid disease when  
8 compared to men.

### 9 **Trends in HF Incidence and Mortality**

10 Population-based temporal trends in HF incidence and mortality have been previously  
11 reported across many cohorts, however many of these studies have been limited to patients  
12 hospitalized with a diagnosis of HF or have not provided detailed, sex-stratified analyses.  
13 Temporal trends in the incidence and survival of HF patients were first reported by the  
14 Framingham group over a 50 year period from 1950-1999<sup>35</sup>. These authors reported that the  
15 incidence of HF had declined in women but not men, with improving survival in both sexes<sup>35</sup>.  
16 This pivotal study was followed by findings from a community-based cohort of 4537 patients  
17 from 1979-2000, which reported that although HF incidence remained unchanged for both sexes,  
18 mortality declined – with greater survival gains in men than women<sup>36</sup>. A recent study by our  
19 group demonstrated that amongst ambulatory Ontario residents from 2009-2013, the incidence of  
20 heart failure decreased more rapidly in men than women. At the same time, heart failure  
21 associated deaths and hospitalizations remain higher in women than men within a year of HF  
22 diagnosis<sup>19</sup>. The present study extends these findings by demonstrating a continued  
23 disproportionate decrease in HF mortality for men compared to women from 1994-2013. Our  
24 findings corroborate with our previous study of HF incidence and one-year mortality in rural and

1  
2  
3 1 urban Eastern Ontario from 1994-2013<sup>24</sup>. They also corroborate the work of Tu and colleagues<sup>7</sup>  
4  
5 2 who used similar administrative databases to report on the HF incidence and mortality of Ontario  
6  
7 3 patients  $\geq 20$  years of age from 1997-2007. Tu evaluated both admitted and ambulatory HF  
8  
9 4 patients and reported declines in HF incidence over this time period, a finding that was most  
10  
11 5 evident in the older cohorts<sup>7</sup>. Sex stratified mortality rates were not reported in this study. A  
12  
13 6 recent study from Denmark demonstrated a decrease in HF incidence over time only in cohorts  
14  
15 7  $>50$  years of age, but an increase in HF incidence in younger patients. Although detailed sex-  
16  
17 8 specific outcomes were not provided, sex-stratified models showed similar trends in incidence  
18  
19 9 and mortality over time with men having a higher incidence overall<sup>8</sup>.

20  
21  
22  
23  
24 10 The present study extends these observations by providing detailed sex-specific data on  
25  
26 11 mortality trends over time. Our findings suggest that in Ontario, one-year mortality rates have  
27  
28 12 decreased over the past 20 years. However, this mortality reduction was greatest for men, and  
29  
30 13 observed to a lesser extent for women. This translates to the observation that women had better  
31  
32 14 AMR than men in the first three temporal cohorts of this study (1994-2008); however in the most  
33  
34 15 recent cohort (2009-2013) we observed mortality to be higher in women than men for the first  
35  
36 16 time. The basis for this sex-based difference is unclear but may be explained in part by the  
37  
38 17 observation that women are more likely than men to have a diagnosis of HFpEF, a disease for  
39  
40 18 which there remains no evidence-based therapies which can improve survival, in contrast to the  
41  
42 19 significant advances in medical therapy for HF with reduced ejection fraction (HFrEF)<sup>37</sup>. In  
43  
44 20 addition, female HF patients have a higher co-morbidity burden than their male counterparts.  
45  
46 21 Complex co-morbid conditions, coupled with atypical presentation of cardiac disease in women,  
47  
48 22 may also have lead to delays in diagnosis and differences in management or response to medical  
49  
50 23 therapy<sup>38</sup>. Further work is needed to determine whether the other sex-based differences in  
51  
52  
53  
54  
55  
56  
57  
58  
59  
60

1 management, response to treatment or underlying pathophysiology remain to explain these sex-  
2 based trends in HF mortality over time.

### 3 **Trends in HF hospitalization**

4 Rates of hospitalization for HF decreased only for men in this time period. This is  
5 consistent with recent reports of sex and race differences in hospitalization trends over a similar  
6 time period<sup>19,39</sup>. It is possible that this sex-based difference may be due to death being a  
7 competing risk for hospitalization in men, such that men with HF may suffer earlier deaths  
8 whereas women with HF survive to an older age and are more likely to become hospitalized.  
9 Alternatively, it is possible that the rates of hospitalization in men and women reflect the  
10 underlying HF type, since men are more likely to have HFrEF (for which there are several  
11 treatments known to improve outcomes and decrease hospitalization) while women are more  
12 likely to have HFpEF (for which there are no substantial evidence-based therapies). Nonetheless,  
13 the observed sex differences may also be attributed to the greater co-morbidity burden in women,  
14 differences in social determinants of health, or genetic or physiologic differences that cannot be  
15 explained within the observational context of this study; all of these point to the need for further  
16 exploration to determine the adverse trends for mortality and hospitalization in women with a  
17 diagnosis of HF.

### 18 **Trends in HF Co-morbidities**

19 Sex-based differences in co-morbidities have been previously reported in hospitalized  
20 patients; women with HF are older and more likely than men to have co-morbid hypertension,  
21 renal failure, obesity, and depression. Men with HF are more often smokers, and tend to have  
22 more ischemic heart disease, COPD, and HFrEF<sup>40</sup>. Our study is the first to report on the  
23 relationship between sex and co-morbidity in ambulatory HF patients over time. Compared to our  
24 historical cohort, our most recent cohort of patients demonstrates an overall increase in important

1 co-morbidities such as frailty, diabetes, renal disease, MI, atrial fibrillation, COPD and  
2 hypertension. This has been observed in other population-based studies<sup>8</sup> and speaks to the  
3 increased complexity of the HF patient in the current era. The increased prevalence of these co-  
4 morbidities over time was seen in both women and men. Certain co-morbidities remained more  
5 common in women than in men in both the historical and recent cohorts; including depression,  
6 hypertension, advanced age, frailty, dementia and thyroid disease. Interestingly, frailty, chronic  
7 pulmonary disease, and metastatic cancer became more common in women than men in the  
8 recent cohort. Collectively these findings suggest that the co-morbidity of the HF patient is  
9 increasing over time, and that women continue to experience a greater co-morbidity burden than  
10 men. This observation may also explain in part the sex difference in mortality trends.

11       Important trends in the risk associated with these co-morbidities were also observed.  
12 Hypertension conferred a greater protective effect in the modern era. This may actually reflect the  
13 known adverse prognosis associated with low blood pressure in HF<sup>41,42</sup>. In addition, the risk  
14 associated with diabetes, renal disease and pulmonary circulatory disease has decreased over  
15 time. In addition, MI was no longer a mortality risk factor in the recent cohort when compared to  
16 the historical cohort. These changes over time may be due to significant advances in the medical  
17 management of these co-morbidities, which have influenced overall survival.

18       Sex-based differences in the risks associated with certain co-morbidities were also  
19 observed. In the most recent cohort, MI had a mild protective effect in men but not in women.  
20 This may be due to a lower detection rate of ischemic heart disease in women due to  
21 atypical presentation<sup>43</sup>, which leads to missed management and poorer outcomes.  
22 Ischemic heart disease is a leading cause of HF in both sexes. When diagnosed with

1  
2  
3 1 ischemic heart disease, women are less likely than men to undergo cardiac  
4  
5  
6  
7 2 catheterization and revascularization; whether this is wholly attributed to the increased  
8  
9  
10 3 microvascular disease in women is not well understood<sup>44</sup>. In the most recent cohort,  
11  
12  
13 4 peripheral arterial disease was associated with a higher risk of mortality in women, while COPD,  
14  
15  
16 5 dementia and malignancy posed a greater risk of mortality in men. Whether these differences are  
17  
18 6 clinically relevant, or help to explain the variability in mortality risk associated with HF, remains  
19  
20 7 to be determined. There remains a significant knowledge gap on sex specific differences in  
21  
22 8 epidemiology, pathophysiology, management and prognosis of co-morbidities related to HF<sup>40</sup>.  
23  
24  
25 9 Such knowledge could determine if HF management should be targeted to specific sex-based co-  
26  
27 10 morbidities to improve outcomes and narrow the gap in mortality improvement between women  
28  
29  
30 11 and men.

## 31 12 **Limitations and Strengths**

32  
33  
34 13 Our study has several limitations. *Firstly*, cases of HF were identified in the ambulatory  
35  
36 14 care setting based on the requirement of 2 claims for HF within one year. Although this method  
37  
38  
39 15 may have led to an underestimate of HF, it has been validated previously and shown to improve  
40  
41 16 the specificity of our case selection<sup>7,9</sup>. *Secondly*, our algorithm for ascertainment of HF is  
42  
43  
44 17 validated in patients who are 40 years of age and older, thus limiting the generalizability of our  
45  
46 18 findings. *Thirdly*, information on ejection fraction was not available in the databases used, which  
47  
48 19 precluded analyses in subtypes of HF based on ventricular function. *Fourthly*, the diagnostic  
49  
50 20 criteria for HFpEF have become more specific over time; whether this may influence incidence  
51  
52 21 and prognosis cannot be determined from this study. *Finally*, cohort studies are by nature  
53  
54  
55 22 subjected to residual confounding. Despite these limitations, our study is the first to address the

1 epidemiology of HF in a validated cohort of *ambulatory* patients, and one of the first to report on  
2 detailed sex-based outcome and co-morbidity differences within a large universal healthcare  
3 system, using the same entry criteria over a 20-year time period. The nature of our publicly  
4 funded healthcare system allowed for complete analysis of all Ontario HF patients, which  
5 minimized selection bias and greatly improved the generalizability of our findings.

## 6 7 **Conclusions**

8 Over a 20-year window, we found an overall reduction in all-cause mortality in the year  
9 following HF diagnosis. However, there was a much larger reduction of mortality in men than in  
10 women, and HF hospitalization rates have decreased for men but remained unchanged in women.  
11 Specifically, mortality and hospitalization rates were higher in men than women at the start of the  
12 study period and were similar between sexes towards the end of this period. Female HF patients  
13 continue to experience a greater burden of co-morbidities than male HF patients in the modern  
14 era. Further research should focus on the determinants of this disparity such as sex differences in  
15 medical and device management, to better characterize incidence and outcomes by HF type, and  
16 ways to reduce this gap in outcomes.

## 17 18 19 **Authorship Contributions:**

20 Conception: LYS, LMM

21 Design: LYS, LMM, JVT

22 Data acquisition and analysis: LYS, ABE

23 Interpretation of results: LYS, LMM, PPL, RB, SC, RD, TC, DSL, PCA, ABE, JVT

1  
2  
3 1 Drafting of manuscript: LYS, LMM  
4

5 2 Critical revision: LYS, LMM, PPL, RB, SC, RD, TC, DSL, PCA, ABE, JVT  
6

7 3 Agreement to be accountable for all aspects of the work: LYS  
8  
9

10 4  
11

12 5 **Funding:** This work was supported by a Team grant from the University of Ottawa Heart Institute  
13  
14 6 (UOHI) (Grant #4556) Ontario, Canada. Dr. Sun is supported by the Ottawa Heart Institute  
15  
16 7 Research Corporation and holds a Tier 2 Clinical Research Chair in Big Data and Cardiovascular  
17  
18 8 Outcomes. Dr. Mielniczuk holds a University of Ottawa Tier-1 Chair in Heart Failure Research  
19  
20 9 and is supported as a Clinician Scientist from the Heart and Stroke Foundation of Ontario (HSFO).  
21  
22 10 Drs. Austin and Beanlands hold Career Investigator Awards from the HSFO. Dr. Beanlands holds  
23  
24 11 a University of Ottawa Tier-1 Chair in Cardiac Imaging Research; and is the UOHI Vered Chair  
25  
26 12 in Cardiology. Dr. Tu was supported by a Canada Research Chair in Health Services Research and  
27  
28 13 an Eaton Scholar Award from the Department of Medicine, University of Toronto, Ontario,  
29  
30 14 Canada. The funders do not have a role in the design and conduct of the study, in the collection,  
31  
32 15 analysis, and interpretation of the data, nor in the preparation, review, or approval of the  
33  
34 16 manuscript.  
35  
36  
37  
38  
39  
40  
41

42 18 **Acknowledgement:** This article is dedicated to the memory Jack V. Tu, MD, PhD, who was a  
43  
44 19 mentor and friend to LYS, DSL and PCA and a respected colleague to all. The authors are  
45  
46 20 indebted to his contributions to this manuscript. This study was supported by the Institute for  
47  
48 21 Clinical Evaluative Sciences (ICES), which is funded by an annual grant from the Ontario  
49  
50 22 Ministry of Health and Long-Term Care (MOHLTC). The authors acknowledge the usage of data  
51  
52 23 compiled and provided by the Canadian Institute for Health Information. These datasets were  
53  
54 24 linked using unique encoded identifiers and analyzed at ICES. The analyses, conclusions,  
55  
56  
57  
58  
59  
60



1  
2  
3  
4  
5  
6  
7  
8  
9  
10  
11  
12  
13  
14  
15  
16  
17  
18  
19  
20  
21  
22  
23  
24  
25  
26  
27  
28  
29  
30  
31  
32  
33  
34  
35  
36  
37  
38  
39  
40  
41  
42  
43  
44  
45  
46  
47  
48  
49  
50  
51  
52  
53  
54  
55  
56  
57  
58  
59  
60

1 opinions and statements expressed in the manuscript are those of the authors, and do not  
2 necessarily reflect those of the above agencies.

4 **Declaration of Interests:** none

For peer review only

## 1 References

- 2 1. McMurray JJ, Adamopoulos S, Anker SD, Auricchio A, Bohm M, Dickstein K, Falk V,  
3 Filippatos G, Fonseca C, Gomez-Sanchez MA, Jaarsma T, Kober L, Lip GY, Maggioni AP,  
4 Parkhomenko A, Pieske BM, Popescu BA, Ronnevik PK, Rutten FH, Schwitter J, Seferovic P,  
5 Stepinska J, Trindade PT, Voors AA, Zannad F, Zeiher A and Guidelines ESCCfP. ESC  
6 Guidelines for the diagnosis and treatment of acute and chronic heart failure 2012: The Task  
7 Force for the Diagnosis and Treatment of Acute and Chronic Heart Failure 2012 of the European  
8 Society of Cardiology. Developed in collaboration with the Heart Failure Association (HFA) of  
9 the ESC. *Eur Heart J*. 2012;33:1787-847.
- 10 2. Huffman MD, Berry JD, Ning H, Dyer AR, Garside DB, Cai X, Daviglius ML and Lloyd-  
11 Jones DM. Lifetime risk for heart failure among white and black Americans: cardiovascular  
12 lifetime risk pooling project. *Journal of the American College of Cardiology*. 2013;61:1510-7.
- 13 3. Roger VL, Go AS, Lloyd-Jones DM, Adams RJ, Berry JD, Brown TM, Carnethon MR,  
14 Dai S, de Simone G, Ford ES, Fox CS, Fullerton HJ, Gillespie C, Greenlund KJ, Hailpern SM,  
15 Heit JA, Ho PM, Howard VJ, Kissela BM, Kittner SJ, Lackland DT, Lichtman JH, Lisabeth LD,  
16 Makuc DM, Marcus GM, Marelli A, Matchar DB, McDermott MM, Meigs JB, Moy CS,  
17 Mozaffarian D, Mussolino ME, Nichol G, Paynter NP, Rosamond WD, Sorlie PD, Stafford RS,  
18 Turan TN, Turner MB, Wong ND, Wylie-Rosett J, American Heart Association Statistics C and  
19 Stroke Statistics S. Heart disease and stroke statistics--2011 update: a report from the American  
20 Heart Association. *Circulation*. 2011;123:e18-e209.
- 21 4. Norberg H. Clinical trial enrolment favours men: Fewer women meet eligibility criteria  
22 for trials of heart failure medication is discussed by Helena Norberg from Sweden. *European*  
23 *Heart Journal*, 2019;40:1104–1105,5.
- 24 5. Scantlebury DC and Borlaug BA. Why are women more likely than men to develop heart  
25 failure with preserved ejection fraction? *Curr Opin Cardiol*. 2011;26:562-8.
- 26 6. Kenchaiah S and Vasan RS. Heart Failure in Women--Insights from the Framingham  
27 Heart Study. *Cardiovasc Drugs Ther*. 2015;29:377-90.
- 28 7. Yeung DF, Boom NK, Guo H, Lee DS, Schultz SE and Tu JV. Trends in the incidence  
29 and outcomes of heart failure in Ontario, Canada: 1997 to 2007. *CMAJ*. 2012;184:E765-73.
- 30 8. Christiansen MN, Kober L, Weeke P, Vasan RS, Jeppesen JL, Smith JG, Gislason GH,  
31 Torp-Pedersen C and Andersson C. Age-Specific Trends in Incidence, Mortality, and  
32 Comorbidities of Heart Failure in Denmark, 1995 to 2012. *Circulation*. 2017;135:1214-1223.
- 33 9. Schultz SE, Rothwell DM, Chen Z and Tu K. Identifying cases of congestive heart failure  
34 from administrative data: a validation study using primary care patient records. *Chronic Dis Inj*  
35 *Can*. 2013;33:160-6.
- 36 10. Tu K, Campbell NRC, Chen ZL, Cauch-Dudek KJ and McAlister FA. Accuracy of  
37 administrative databases in identifying patients with hypertension. *Open Medicine*. 2007;1.
- 38 11. Juurlink D, Preya C, Croxford R, Chong A, Austin P, Tu J and Laupacis A. *Canadian*  
39 *Institute for Health Information Discharge Abstract Database: A Validation Study. ICES*  
40 *Investigative Report*. Toronto, ON: Institute for Clinical Evaluative Sciences; 2006.
- 41 12. Hux JE, Ivis F, Flintoft V and Bica A. Diabetes in Ontario: determination of prevalence  
42 and incidence using a validated administrative data algorithm. *Diabetes Care*. 2002;25.
- 43 13. Austin PC, Daly PA and Tu JV. A multicenter study of the coding accuracy of hospital  
44 discharge administrative data for patients admitted to cardiac care units in Ontario. *Am Heart J*.  
45 2002;144.

- 1  
2  
3 1 14. du Plessis V, Beshiri R, Bollman RD and Clemeson H. *Definitions of "rural". Agriculture*  
4 2 *and Rural Working Paper Series, No. 61.* Ottawa, ON: Statistics Canada; 2002.
- 5 3 15. Gershon AS, Wang C, Guan J, Vasilevska-Ristovska J, Cicutto L and To T. Identifying  
6 4 patients with physician-diagnosed asthma in health administrative databases. *Can Respir J.*  
7 5 2009;16.
- 8 6 16. Gershon AS, Wang C, Guan J, Vasilevska-Ristovska J, Cicutto L and To T. Identifying  
9 7 individuals with physician diagnosed COPD in health administrative databases. *COPD.* 2009;6.
- 10 8 17. Quan H, Sundararajan V, Halfon P, Fong A, Burnand B, Luthi JC, Saunders LD, Beck  
11 9 CA, Feasby TE and Ghali WA. Coding algorithms for defining comorbidities in ICD-9-CM and  
12 10 ICD-10 administrative data. *Med Care.* 2005;43.
- 13 11 18. Sun LY, Gershon AS, Ko DT, Thilen SR, Yun L, Beattie WS and Wijeyesundera DN.  
14 12 Trends in Pulmonary Function Testing Before Noncardiothoracic Surgery. *JAMA Intern Med.*  
15 13 2015;175:1410-2.
- 16 14 19. Sun L.Y. Tu JV, Coutinho T., Turek M., Rubens F., McDonnell L., Tulloch H.,  
17 15 Mielniczuk L.M. Sex Differences in Heart Failure Outcomes in an Ambulatory, Population-  
18 16 Based Cohort. *CMAJ.* 2018;190:E848-E854.
- 19 17 20. Sun L.Y. Tu JV, Lee D.S., Beanlands R.S., Ruel M., Austin P.C., Bader Eddeen A., Liu  
20 18 P.P. Disability-Free Survival After Coronary Artery Bypass Grafting in Women and Men with  
21 19 Heart Failure. *BMJ Open Heart.* 2018;5:e000911.
- 22 20 21. Sun LY, Gaudino M, Chen RJ, Bader Eddeen A and Ruel M. Long-term Outcomes in  
23 21 Patients With Severely Reduced Left Ventricular Ejection Fraction Undergoing Percutaneous  
24 22 Coronary Intervention vs Coronary Artery Bypass Grafting. *JAMA cardiology.* 2020.
- 25 23 22. Sun LY, Kimmoun A, Takagi K, Liu PP, Bader Eddeen A and Mebazaa A. Ethnic  
26 24 differences in acute heart failure outcomes in Ontario. *Int J Cardiol.* 2019;291:177-182.
- 27 25 23. Sun LY, Tu JV, Eddeen AB and Liu PP. Prevalence and long-term survival after coronary  
28 26 artery bypass grafting in women and men with heart failure and preserved versus reduced  
29 27 ejection fraction. *Journal of the American Heart Association.* 2018;7:1-14.
- 30 28 24. Sun LY, Tu JV, Sherrard H, Rodger N, Coutinho T, Turek M, Chan E, Tulloch H,  
31 29 McDonnell L and Mielniczuk LM. Sex-Specific Trends in Incidence and Mortality for Urban and  
32 30 Rural Ambulatory Patients with Heart Failure in Eastern Ontario from 1994 to 2013. *Journal of*  
33 31 *Cardiac Failure.* 2018;24:568-574.
- 34 32 25. Tran DTT, Tu JV, Dupuis J-Y, Bader Eddeen A and Sun LY. Association of Frailty and  
35 33 Long-Term Survival in Patients Undergoing Coronary Artery Bypass Grafting. *Journal of the*  
36 34 *American Heart Association.* 2018;7.
- 37 35 26. Johnston AM, T. G; Lee, D. S.; Bader Eddeen, A.; Sun, L. Y. Sex Differences in Long-  
38 36 Term Survival After Major Cardiac Surgery: A Population-Based Cohort Study. *Journal of the*  
39 37 *American Heart Association.* 2019;8:e013260.
- 40 38 27. Hayatsu Y, Ruel M, Bader Eddeen A and Sun L. Single Versus Multiple Arterial  
41 39 Revascularization in Patients With Reduced Renal Function: Long-term Outcome Comparisons  
42 40 in 23,406 CABG Patients From Ontario, Canada. *Ann Surg.* 2020.
- 43 41 28. Sun LY, Spence SD, Benton S, Beanlands RS, Austin PC, Bader Eddeen A and Lee DS.  
44 42 Age, Not Sex, Modifies the Effect of Frailty on Long-term Outcomes After Cardiac Surgery. *Ann*  
45 43 *Surg.* 2020.
- 46 44 29. Rubens FD, Wells GA, Coutinho T, Eddeen AB and Sun LY. Sex differences after  
47 45 coronary artery bypass grafting with a second arterial conduit. *The Journal of thoracic and*  
48 46 *cardiovascular surgery.* 2020.

- 1  
2  
3 1 30. Lieberman R AC, Weiner J. Development and evaluation of the Johns Hopkins University  
4 2 Risk Adjustment Models for Medicare+ Choice Plan Payment. 2003.  
5 3 31. Sternberg SA, Bentur N, Abrams C, Spalter T, Karpati T, Lemberger J and Heymann AD.  
6 4 Identifying frail older people using predictive modeling. *Am J Manag Care*. 2012;18:e392-7.  
7 5 32. The Johns Hopkins Adjusted Clinical Groups Technical Reference Guide, version 9.0.  
8 6 2009.  
9 7 33. Bronskill S CM, Costa A, et al. Aging in Ontario: An ICES Chartbook of Health Services  
10 8 Use by Older Adults - a Technical Report. 2010.  
11 9 34. Bronskill S CX, Gruneir A, Ho M. Health system use by frail Ontario seniors: an in-depth  
12 10 examination of four vulnerable cohorts. 2011.  
13 11 35. Levy D, Kenchaiah S, Larson MG, Benjamin EJ, Kupka MJ, Ho KK, Murabito JM and  
14 12 Vasan RS. Long-term trends in the incidence of and survival with heart failure. *N Engl J Med*.  
15 13 2002;347:1397-402.  
16 14 36. Roger VL, Weston SA, Redfield MM, Hellermann-Homan JP, Killian J, Yawn BP and  
17 15 Jacobsen SJ. Trends in heart failure incidence and survival in a community-based population.  
18 16 *JAMA*. 2004;292:344-50.  
19 17 37. Writing Committee M, Yancy CW, Jessup M, Bozkurt B, Butler J, Casey DE, Jr., Colvin  
20 18 MM, Drazner MH, Filippatos G, Fonarow GC, Givertz MM, Hollenberg SM, Lindenfeld J,  
21 19 Masoudi FA, McBride PE, Peterson PN, Stevenson LW and Westlake C. 2016 ACC/AHA/HFSA  
22 20 Focused Update on New Pharmacological Therapy for Heart Failure: An Update of the 2013  
23 21 ACCF/AHA Guideline for the Management of Heart Failure: A Report of the American College  
24 22 of Cardiology/American Heart Association Task Force on Clinical Practice Guidelines and the  
25 23 Heart Failure Society of America. *Circulation*. 2016;134:e282-93.  
26 24 38. Taylor AL. Heart failure in women. *Curr Heart Fail Rep*. 2015;12:187-95.  
27 25 39. Ziaeeian B, Kominski GF, Ong MK, Mays VM, Brook RH and Fonarow GC. National  
28 26 Differences in Trends for Heart Failure Hospitalizations by Sex and Race/Ethnicity. *Circ*  
29 27 *Cardiovasc Qual Outcomes*. 2017;10.  
30 28 40. Hopper I, Kotecha D, Chin KL, Mentz RJ and von Lueder TG. Comorbidities in Heart  
31 29 Failure: Are There Gender Differences? *Curr Heart Fail Rep*. 2016;13:1-12.  
32 30 41. Raphael CE, Whinnett ZI, Davies JE, Fontana M, Ferenczi EA, Manisty CH, Mayet J and  
33 31 Francis DP. Quantifying the paradoxical effect of higher systolic blood pressure on mortality in  
34 32 chronic heart failure. *Heart*. 2009;95:56-62.  
35 33 42. Schmid FA, Schlager O, Keller P, Seifert B, Huang R, Frohlich GM, Luscher TF,  
36 34 Ruschitzka F and Enseleit F. Prognostic value of long-term blood pressure changes in patients  
37 35 with chronic heart failure. *Eur J Heart Fail*. 2017;19:837-842.  
38 36 43. Jarvie JL and Foody JM. Recognizing and improving health care disparities in the  
39 37 prevention of cardiovascular disease in women. *Curr Cardiol Rep*. 2010;12:488-96.  
40 38 44. McSweeney J, Pettey C, Lefler LL and Heo S. Disparities in heart failure and other  
41 39 cardiovascular diseases among women. *Women's health (London, England)*. 2012;8:473-85.  
42  
43  
44  
45  
46  
47  
48  
49  
50  
51  
52  
53  
54  
55  
56  
57  
58  
59  
60

1  
2  
3 **1 FIGURE LEGENDS**  
4

5 2 Figure 1. Sex-specific temporal trends in the incidence of heart failure in Ontario from April 1,  
6 3 1994 to March 31, 2014.

7 4 Legend: Incidence rates were directly standardized by age and expressed per 100,000. The solid  
8 5 line represents incidence trends in women. The dotted line represents incidence trends in men.  
9 6  
10 7  
11 8

12 9 Figure 2a. Stacked Kaplan-Meier curves representing temporal trends in one-year survival after  
13 10 heart failure diagnosis in men.

14 11 Legend: The red line represents survival in the historical cohort (1994-1998). The blue line  
15 12 represents survival in the 1999-2003 cohort. The orange line represents survival in the 2004-2008  
16 13 cohort. The green line represents survival in the modern cohort (2009-2013).  
17 14  
18 15

19 16 Figure 2b. Stacked Kaplan-Meier curves representing temporal trends in one-year survival after  
20 17 heart failure diagnosis in women.

21 18 Legend: The red line represents survival in the historical cohort (1994-1998). The blue line  
22 19 represents survival in the 1999-2003 cohort. The orange line represents survival in the 2004-2008  
23 20 cohort. The green line represents survival in the modern cohort (2009-2013).  
24 21  
25 22

26 23 Figure 3. Sex-specific temporal trends in mortality within one year of ambulatory heart failure  
27 24 diagnosis.

28 25 Legend: Mortality rates were directly standardized by age and expressed per 1000. The solid line  
29 26 represents mortality trends in women. The dotted line represents mortality trends in men.  
30 27  
31 28  
32 29  
33 30  
34 31  
35 32  
36 33  
37 34  
38 35  
39 36  
40 37  
41 38  
42 39  
43 40  
44 41  
45 42  
46 43  
47 44  
48 45  
49 46  
50 47  
51 48  
52 49  
53 50  
54 51  
55 52  
56 53  
57 54  
58 55  
59 56  
60 57

58 25 Figure 4. Kaplan-Meier curves representing temporal trends in one-year survival after heart  
59 26 failure diagnosis, in each of the 5-year cohorts.

60 27 Legend: The red line represents survival in men. The blue line represents survival in women.

1 Table 1. Temporal trends in characteristics of men and women with incident heart failure over time.

| Variable                  | Historic Cohort (1994-1998) |                 |             | 1999 – 2003       |                  |             | 2004-2009         |                 |             | Modern Cohort (2009-2013) |                 |             |
|---------------------------|-----------------------------|-----------------|-------------|-------------------|------------------|-------------|-------------------|-----------------|-------------|---------------------------|-----------------|-------------|
|                           | Women<br>N=47,676           | Men<br>N=43,907 | P-<br>Value | Women<br>N=43,190 | Men<br>N=42,108  | P-<br>Value | Women<br>N=41,043 | Men<br>N=43,698 | P-<br>Value | Women<br>N=42,746         | Men<br>N=47,961 | P-<br>Value |
| <b>Socio-Demographics</b> |                             |                 |             |                   |                  |             |                   |                 |             |                           |                 |             |
| Age (Mean ± SD)           | 76.3 ± 11.2                 | 72.0 ± 11.3     | <.001       | 76.2 ± 11.8       | 71.9 ± 11.8      | <.001       | 76.0 ± 12.3       | 71.6 ± 12.4     | <.001       | 75.8 ± 12.9               | 71.5 ± 12.8     | <.001       |
| Rurality                  | 8,256 (17.3)                | 8,518 (19.4)    | <.001       | 6,781 (15.7)      | 6,996 (16.6)     | <.001       | 5,602 (13.6)      | 6,667 (15.3)    | <.001       | 5,358 (12.5)              | 6,788 (14.2)    | <.001       |
| Income Quintile           |                             |                 |             |                   |                  |             |                   |                 |             |                           |                 |             |
| 1 (Lowest)                | 11,651 (24.4)               | 9,297 (21.2)    | <.001       | 10,121<br>(23.4)  | 8,529 (20.3)     | <.001       | 9,661 (23.5)      | 9,096 (20.8)    | <.001       | 9,613 (22.5)              | 9,541 (19.9)    | <.001       |
| 2                         | 10,377 (21.8)               | 9,418 (21.4)    |             | 9,814 (22.7)      | 9,319 (22.1)     |             | 9,070 (22.1)      | 9,317 (21.3)    |             | 9,243 (21.6)              | 9,833 (20.5)    |             |
| 3                         | 9,506 (19.9)                | 8,983 (20.5)    |             | 8,571 (19.8)      | 8,683 (20.6)     |             | 7,891 (19.2)      | 8,576 (19.6)    |             | 8,325 (19.5)              | 9,444 (19.7)    |             |
| 4                         | 8,208 (17.2)                | 8,024 (18.3)    |             | 7,403 (17.1)      | 7,770 (18.5)     |             | 7,274 (17.7)      | 8,308 (19.0)    |             | 8,017 (18.8)              | 9,775 (20.4)    |             |
| 5 (Highest)               | 7,698 (16.1)                | 7,956 (18.1)    |             | 7,168 (16.6)      | 7,690 (18.3)     |             | 6,976 (17.0)      | 8,233 (18.8)    |             | 7,388 (17.3)              | 9,188 (19.2)    |             |
| <b>Comorbidities</b>      |                             |                 |             |                   |                  |             |                   |                 |             |                           |                 |             |
| Uncomplicated HTN         | 31,751 (66.6)               | 26,068 (59.4)   | <.001       | 31,381<br>(72.7)  | 27,909<br>(66.3) | <.001       | 31,336 (76.3)     | 30,730 (70.3)   | <.001       | 32,809 (76.8)             | 34,103(71.1)    | <.001       |

|    |                       |               |               |       |              |              |       |               |               |       |               |               |       |
|----|-----------------------|---------------|---------------|-------|--------------|--------------|-------|---------------|---------------|-------|---------------|---------------|-------|
| 1  |                       |               |               |       |              |              |       |               |               |       |               |               |       |
| 2  |                       |               |               |       |              |              |       |               |               |       |               |               |       |
| 3  | Complicated HTN       | 2,507 (5.3)   | 2,006 (4.6)   | <.001 | 2,178 (5.0)  | 1,921 (4.6)  | <.001 | 3,254 (7.9)   | 3,551 (8.1)   | 0.29  | 5,669 (13.3)  | 6,516 (13.6)  | 0.15  |
| 4  |                       |               |               |       |              |              |       |               |               |       |               |               |       |
| 5  | Atrial Fibrillation   | 4,660 (9.8)   | 4,769 (10.9)  | <.001 | 5,034 (11.7) | 5,313 (12.6) | <.001 | 5,180 (12.6)  | 5,956 (13.6)  | <.001 | 5,957 (13.9)  | 6,919 (14.4)  | 0.035 |
| 6  |                       |               |               |       |              |              |       |               |               |       |               |               |       |
| 7  |                       |               |               |       |              |              |       |               |               |       |               |               |       |
| 8  | Myocardial Infarction | 2,954 (6.2)   | 4,697 (10.7)  | <.001 | 3,629 (8.4)  | 5,937 (14.1) | <.001 | 4,323 (10.5)  | 8,030 (18.4)  | <.001 | 5,051 (11.8)  | 9,617 (20.1)  | <.001 |
| 9  |                       |               |               |       |              |              |       |               |               |       |               |               |       |
| 10 | Valvular Disease      | 1,835 (3.8)   | 1,864 (4.2)   | 0.002 | 1,981 (4.6)  | 2,087 (5.0)  | 0.002 | 1,759 (4.3)   | 2,163 (4.9)   | <.001 | 2,099 (4.9)   | 2,841 (5.9)   | <.001 |
| 11 |                       |               |               |       |              |              |       |               |               |       |               |               |       |
| 12 | PAD                   | 3,136 (6.6)   | 3,994 (9.1)   | <.001 | 2,928 (6.8)  | 3,684 (8.7)  | <.001 | 1,584 (3.9)   | 2,405 (5.5)   | <.001 | 1,272 (3.0)   | 2,257 (4.7)   | <.001 |
| 13 |                       |               |               |       |              |              |       |               |               |       |               |               |       |
| 14 | CVD                   | 4,429 (9.3)   | 4,401 (10.0)  | <.001 | 3,841 (8.9)  | 3,834 (9.1)  | <.001 | 2,808 (6.8)   | 3,003 (6.9)   | 0.86  | 2,506 (5.9)   | 2,713 (5.7)   | 0.18  |
| 15 |                       |               |               |       |              |              |       |               |               |       |               |               |       |
| 16 | PCD                   | 296 (0.6)     | 286 (0.7)     | 0.561 | 491 (1.1)    | 362 (0.9)    | 0.56  | 807 (2.0)     | 588 (1.3)     | <.001 | 1,113 (2.6)   | 882 (1.8)     | <.001 |
| 17 |                       |               |               |       |              |              |       |               |               |       |               |               |       |
| 18 |                       |               |               |       |              |              |       |               |               |       |               |               |       |
| 19 | COPD/Asthma           | 13,091 (27.5) | 14,352 (32.7) | <.001 | 14,557       | 14,988       | <.001 | 15,209 (37.1) | 15,996 (36.6) | 0.17  | 16,261 (38.0) | 17,164 (35.8) | <.001 |
| 20 |                       |               |               |       |              |              |       |               |               |       |               |               |       |
| 21 |                       |               |               |       |              |              |       |               |               |       |               |               |       |
| 22 |                       |               |               |       |              |              |       |               |               |       |               |               |       |
| 23 |                       |               |               |       |              |              |       |               |               |       |               |               |       |
| 24 |                       |               |               |       |              |              |       |               |               |       |               |               |       |
| 25 |                       |               |               |       |              |              |       |               |               |       |               |               |       |
| 26 | Alcohol Abuse         | 128 (0.3)     | 398 (0.9)     | <.001 | 187 (0.4)    | 562 (1.3)    | <.001 | 313 (0.8)     | 965 (2.2)     | <.001 | 337 (0.8)     | 1,123 (2.3)   | <.001 |
| 27 |                       |               |               |       |              |              |       |               |               |       |               |               |       |
| 28 |                       |               |               |       |              |              |       |               |               |       |               |               |       |
| 29 | Renal Disease         | 1,127 (2.4)   | 1,527 (3.5)   | <.001 | 1,410 (3.3)  | 1,935 (4.6)  | <.001 | 1,849 (4.5)   | 2,588 (5.9)   | <.001 | 1,954 (4.6)   | 2,865 (6.0)   | <.001 |
| 30 |                       |               |               |       |              |              |       |               |               |       |               |               |       |
| 31 | Diabetes              | 9,600 (20.1)  | 10,462 (23.8) | <.001 | 10,359       | 12,182       | <.001 | 12,204 (29.7) | 15,243 (34.9) | <.001 | 14,751 (34.5) | 18,721 (39.0) | <.001 |
| 32 |                       |               |               |       |              |              |       |               |               |       |               |               |       |
| 33 |                       |               |               |       |              |              |       |               |               |       |               |               |       |
| 34 |                       |               |               |       |              |              |       |               |               |       |               |               |       |
| 35 |                       |               |               |       |              |              |       |               |               |       |               |               |       |
| 36 |                       |               |               |       |              |              |       |               |               |       |               |               |       |
| 37 | Hypothyroidism        | 2,155 (4.5)   | 541 (1.2)     | <.001 | 2,212 (5.1)  | 597 (1.4)    | <.001 | 1,421 (3.5)   | 428 (1.0)     | <.001 | 1,300 (3.0)   | 479 (1.0)     | <.001 |
| 38 |                       |               |               |       |              |              |       |               |               |       |               |               |       |
| 39 |                       |               |               |       |              |              |       |               |               |       |               |               |       |
| 40 |                       |               |               |       |              |              |       |               |               |       |               |               |       |
| 41 |                       |               |               |       |              |              |       |               |               |       |               |               |       |
| 42 |                       |               |               |       |              |              |       |               |               |       |               |               |       |
| 43 |                       |               |               |       |              |              |       |               |               |       |               |               |       |
| 44 |                       |               |               |       |              |              |       |               |               |       |               |               |       |
| 45 |                       |               |               |       |              |              |       |               |               |       |               |               |       |
| 46 |                       |               |               |       |              |              |       |               |               |       |               |               |       |
| 47 |                       |               |               |       |              |              |       |               |               |       |               |               |       |



|                       |             |             |       |              |              |       |               |              |       |               |              |       |
|-----------------------|-------------|-------------|-------|--------------|--------------|-------|---------------|--------------|-------|---------------|--------------|-------|
| Liver Disease         | 559 (1.2)   | 772 (1.8)   | <.001 | 541 (1.3)    | 800 (1.9)    | <.001 | 540 (1.3)     | 775 (1.8)    | <.001 | 579 (1.4)     | 895 (1.9)    | <.001 |
| Anemia                | 2,569 (5.4) | 1,403 (3.2) | <.001 | 4,734 (11.0) | 3,204 (7.6)  | <.001 | 4,629 (11.3)  | 3,382 (7.7)  | <.001 | 5,182 (12.1)  | 3,929 (8.2)  | <.001 |
| Dementia              | 1,935 (4.1) | 1,188 (2.7) | <.001 | 2,007 (4.6)  | 1,258 (3.0)  | <.001 | 1,816 (4.4)   | 1,121 (2.6)  | <.001 | 1,791 (4.2)   | 1,194 (2.5)  | <.001 |
| Depression            | 1,788 (3.8) | 911 (2.1)   | <.001 | 1,617 (3.7)  | 872 (2.1)    | <.001 | 1,364 (3.3)   | 859 (2.0)    | <.001 | 1,213 (2.8)   | 756 (1.6)    | <.001 |
| Psychosis             | 1,932 (4.1) | 1,134 (2.6) | <.001 | 1,695 (3.9)  | 1,106 (2.6)  | <.001 | 486 (1.2)     | 350 (0.8)    | <.001 | 223 (0.5)     | 171 (0.4)    | <.001 |
| Primary Tumor         | 3,055 (6.4) | 4,363 (9.9) | <.001 | 3,026 (7.0)  | 4,045 (9.6)  | <.001 | 2,947 (7.2)   | 4,060 (9.3)  | <.001 | 3,376 (7.9)   | 4,419 (9.2)  | <.001 |
| Metastatic Malignancy | 869 (1.8)   | 804 (1.8)   | 0.924 | 925 (2.1)    | 775 (1.8)    | 0.92  | 850 (2.1)     | 723 (1.7)    | <.001 | 1,000 (2.3)   | 840 (1.8)    | <.001 |
| Paraplegia            | 840 (1.8)   | 899 (2.0)   | 0.002 | 854 (2.0)    | 903 (2.1)    | 0.002 | 521 (1.3)     | 572 (1.3)    | 0.61  | 434 (1.0)     | 475 (1.0)    | 0.71  |
| VTE                   | 1,161 (2.4) | 1,017 (2.3) | 0.238 | 945 (2.2)    | 714 (1.7)    | 0.24  | 557 (1.4)     | 505 (1.2)    | 0.008 | 450 (1.1)     | 512 (1.1)    | 0.83  |
| Frailty               | 4,302 (9.0) | 2,700 (6.1) | <.001 | 5,598 (13.0) | 4,364 (10.4) | <.001 | 10,163 (24.8) | 7,175 (16.4) | <.001 | 11,223 (26.3) | 8,409 (17.5) | <.001 |

1 Values are expressed number (%) unless otherwise indicated. SD, standard deviation; HTN, hypertension; IHD, ischemic heart disease; PAD, peripheral arterial  
 2 disease; CVD, cerebrovascular disease; PCD, pulmonary circulatory disease; COPD, chronic obstructive pulmonary disease; VTE, venous thromboembolism



1 Table 2. Evolution of multivariable risk factors of one-year mortality over time. Risk factors that have changed in  
 2 magnitude between the historical (1994-1998) and modern (2009-2013) times are indicated in bold.

| Variable                      | Adjusted HR (95% CI)    |                  |                  |                         |
|-------------------------------|-------------------------|------------------|------------------|-------------------------|
|                               | 1994-1998               | 1999-2003        | 2004-2008        | 2009-2013               |
| Age Category                  |                         |                  |                  |                         |
| 40-64 years                   | Reference               | Reference        | Reference        | Reference               |
| 65-74 years                   | 1.56 (1.47-1.65)        | 1.64 (1.53-1.74) | 1.66 (1.56-1.77) | 1.54 (1.44-1.64)        |
| 75-84 years                   | <b>2.26 (2.14-2.39)</b> | 2.36 (2.23-2.5)  | 2.48 (2.34-2.63) | <b>2.58 (2.43-2.73)</b> |
| > 85 years                    | <b>3.68 (3.48-3.90)</b> | 4.25 (4.00-4.51) | 4.57 (4.31-4.85) | <b>4.89 (4.62-5.18)</b> |
| Female                        | <b>0.85 (0.82-0.88)</b> | 0.89 (0.86-0.92) | 0.91 (0.88-0.94) | <b>0.97 (0.93-1.00)</b> |
| Rural                         | <b>0.94 (0.90-0.98)</b> | 1.00 (0.96-1.05) | 0.99 (0.95-1.04) | <b>1.01 (0.96-1.06)</b> |
| Income Quintile               |                         |                  |                  |                         |
| 1 (Low)                       | 1.06 (1.01-1.11)        | 1.08 (1.03-1.14) | 1.12 (1.06-1.18) | 1.08 (1.02-1.14)        |
| 2                             | 1.03 (0.98-1.08)        | 1.04 (0.99-1.09) | 1.04 (0.99-1.10) | 1.04 (0.98-1.09)        |
| 3                             | 1.06 (1.01-1.11)        | 1.03 (0.98-1.09) | 1.04 (0.98-1.10) | 0.99 (0.94-1.04)        |
| 4                             | 1.02 (0.97-1.08)        | 0.99 (0.94-1.05) | 1.08 (1.03-1.14) | 1.01 (0.95-1.06)        |
| 5 (High)                      | Reference               | Reference        | Reference        | Reference               |
| Benign Hypertension           | 0.76 (0.74-0.79)        | 0.74 (0.72-0.77) | 0.73 (0.70-0.76) | 0.78 (0.75-0.81)        |
| Complicated Hypertension      | <b>0.93 (0.86-1.00)</b> | 0.95 (0.88-1.02) | 0.87 (0.82-0.93) | <b>0.77 (0.73-0.81)</b> |
| Atrial Fibrillation           | <b>0.89 (0.85-0.94)</b> | 0.92 (0.88-0.96) | 0.96 (0.92-1.01) | <b>0.99 (0.95-1.04)</b> |
| Myocardial Infarction         | <b>1.12 (1.06-1.18)</b> | 0.99 (0.94-1.05) | 1.02 (0.97-1.06) | <b>0.98 (0.94-1.03)</b> |
| Valvular Disease              | <b>1.00 (0.92-1.08)</b> | 0.98 (0.91-1.06) | 0.97 (0.90-1.05) | <b>0.93 (0.86-1.00)</b> |
| Peripheral Arterial Disease   | 1.22 (1.16-1.29)        | 1.2 (1.14-1.27)  | 1.28 (1.20-1.37) | 1.34 (1.24-1.44)        |
| Cerebrovascular Disease       | 1.29 (1.23-1.35)        | 1.25 (1.19-1.32) | 1.23 (1.16-1.30) | 1.20 (1.13-1.28)        |
| Pulmonary Circulatory Disease | <b>1.67 (1.43-1.96)</b> | 1.73 (1.52-1.97) | 1.54 (1.38-1.71) | <b>1.24 (1.12-1.37)</b> |
| COPD/Asthma                   | 1.15 (1.12-1.19)        | 1.18 (1.14-1.22) | 1.21 (1.17-1.25) | 1.17 (1.13-1.21)        |
| Alcohol Abuse                 | <b>1.16 (0.97-1.38)</b> | 1.34 (1.16-1.55) | 1.51 (1.34-1.70) | <b>1.62 (1.45-1.82)</b> |
| Renal Disease                 | <b>2.04 (1.90-2.18)</b> | 1.86 (1.74-1.98) | 1.73 (1.63-1.84) | <b>1.67 (1.58-1.77)</b> |

|    |                        |                         |                  |                  |                         |
|----|------------------------|-------------------------|------------------|------------------|-------------------------|
| 1  |                        |                         |                  |                  |                         |
| 2  |                        |                         |                  |                  |                         |
| 3  | Diabetes               | <b>1.25 (1.21-1.30)</b> | 1.19 (1.15-1.24) | 1.13 (1.09-1.17) | <b>1.13 (1.10-1.17)</b> |
| 4  |                        |                         |                  |                  |                         |
| 5  | Hypothyroidism         | 0.99 (0.91-1.07)        | 1.01 (0.93-1.09) | 1.03 (0.93-1.13) | 1.06 (0.96-1.17)        |
| 6  |                        |                         |                  |                  |                         |
| 7  | Liver Disease          | <b>1.90 (1.72-2.10)</b> | 1.86 (1.68-2.06) | 1.99 (1.79-2.21) | <b>2.34 (2.12-2.59)</b> |
| 8  |                        |                         |                  |                  |                         |
| 9  | Dementia               | <b>1.74 (1.63-1.85)</b> | 1.97 (1.86-2.09) | 2.03 (1.91-2.16) | <b>1.96 (1.84-2.09)</b> |
| 10 |                        |                         |                  |                  |                         |
| 11 | Depression             | 1.15 (1.07-1.25)        | 1.18 (1.09-1.28) | 1.19 (1.09-1.30) | 1.16 (1.06-1.28)        |
| 12 |                        |                         |                  |                  |                         |
| 13 | Psychosis              | 1.29 (1.20-1.38)        | 1.36 (1.26-1.46) | 1.14 (0.99-1.31) | 1.43 (1.17-1.76)        |
| 14 |                        |                         |                  |                  |                         |
| 15 | Primary Tumor          | 1.56 (1.49-1.64)        | 1.69 (1.60-1.77) | 1.61 (1.53-1.70) | 1.64 (1.56-1.73)        |
| 16 |                        |                         |                  |                  |                         |
| 17 | Metastatic Malignancy  | 3.47 (3.22-3.74)        | 3.59 (3.33-3.87) | 3.14 (2.90-3.41) | 3.42 (3.17-3.70)        |
| 18 |                        |                         |                  |                  |                         |
| 19 | Paraplegia             | 1.36 (1.24-1.50)        | 1.33 (1.21-1.46) | 1.52 (1.35-1.70) | 1.53 (1.35-1.75)        |
| 20 |                        |                         |                  |                  |                         |
| 21 | Venous Thromboembolism | <b>1.07 (0.98-1.17)</b> | 1.18 (1.07-1.30) | 1.16 (1.03-1.31) | <b>1.40 (1.24-1.58)</b> |
| 22 |                        |                         |                  |                  |                         |

1

2 HR, hazard ratio; CI, confidence interval; COPD, chronic obstructive pulmonary disease

1 Table 3a. Sex-specific risk factors of one-year mortality in the historical cohort (1994-1998).

| Variable              | Women            | Men              | Multiplicative Interaction |
|-----------------------|------------------|------------------|----------------------------|
|                       | HR (95% CI)      | HR (95% CI)      | P-Value*                   |
| Age Category          |                  |                  |                            |
| 40-64 years           | Reference        | Reference        | 0.004                      |
| 65-74 years           | 1.45 (1.32-1.59) | 1.63 (1.51-1.75) |                            |
| 75-84 years           | 2.06 (1.89-2.24) | 2.42 (2.25-2.60) |                            |
| > 85 years            | 3.53 (3.24-3.85) | 3.70 (3.41-4.00) |                            |
| Benign Hypertension   | 0.70 (0.67-0.73) | 0.82 (0.79-0.86) | <0.001                     |
| Myocardial Infarction | 1.26 (1.16-1.36) | 1.02 (0.95-1.10) | <0.001                     |
| COPD/Asthma           | 1.10 (1.05-1.16) | 1.20 (1.15-1.25) | 0.01                       |
| Renal Disease         | 2.26 (2.04-2.50) | 1.90 (1.74-2.07) | 0.01                       |
| Diabetes              | 1.31 (1.25-1.38) | 1.20 (1.14-1.26) | 0.01                       |

2  
3 HR, hazard ratio; CI, confidence interval; COPD; chronic obstructive pulmonary disease

4 \* Multiplicative interaction terms were formed by multiplying sex by each of the covariates in the multivariable Cox  
5 proportional hazard model for one-year mortality. Only significant interaction terms (i.e., ones demonstrating sex-  
6 specific risk factors) were reported in this table.

1 Table 3b. Sex-specific risk factors of one-year mortality in the modern cohort (2009-2013).

| Variable                    | Women            | Men              | Multiplicative Interaction |
|-----------------------------|------------------|------------------|----------------------------|
|                             | HR (95% CI)      | HR (95% CI)      | P-Value *                  |
| Income Quintile             |                  |                  |                            |
| 1 (Low)                     | 1.02 (0.94-1.09) | 1.15 (1.06-1.23) | 0.001                      |
| 2                           | 0.97 (0.90-1.05) | 1.10 (1.02-1.18) |                            |
| 3                           | 0.99 (0.92-1.07) | 0.98 (0.91-1.06) |                            |
| 4                           | 1.01 (0.93-1.09) | 1.01 (0.93-1.08) |                            |
| 5 (High)                    | Reference        | Reference        |                            |
| Myocardial Infarction       | 1.05 (0.98-1.12) | 0.94 (0.89-1.00) | 0.02                       |
| Peripheral Arterial Disease | 1.48 (1.32-1.66) | 1.25 (1.14-1.37) | 0.02                       |
| COPD/Asthma                 | 1.12 (1.07-1.17) | 1.23 (1.17-1.29) | 0.005                      |
| Dementia                    | 1.87 (1.72-2.02) | 2.10 (1.92-2.30) | 0.05                       |
| Primary Tumor               | 1.44 (1.34-1.56) | 1.79 (1.68-1.91) | <0.001                     |
| Metastatic Malignancy       | 3.05 (2.75-3.38) | 3.85 (3.49-4.26) | <0.001                     |

2  
3 HR, hazard ratio; CI, confidence interval; COPD; chronic obstructive pulmonary disease

4 \* Multiplicative interaction terms were formed by multiplying sex by each of the covariates in the multivariable Cox  
5 proportional hazard model for one-year mortality. Only significant interaction terms (i.e., ones demonstrating sex-  
6 specific risk factors) were reported in this table.  
7 ed in this table.

1  
2  
3  
4  
5  
6  
7  
8  
9  
10  
11  
12  
13  
14  
15  
16  
17  
18  
19  
20  
21  
22  
23  
24  
25  
26  
27  
28  
29  
30  
31  
32  
33  
34  
35  
36  
37  
38  
39  
40  
41  
42  
43  
44  
45  
46  
47  
48  
49  
50  
51  
52  
53  
54  
55  
56  
57  
58  
59  
60

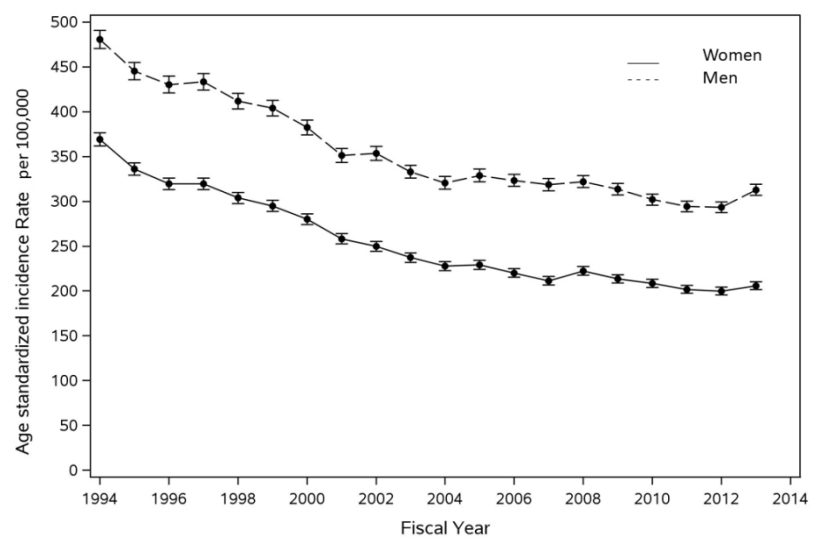

Figure 1. Sex-specific temporal trends in the incidence of heart failure in Ontario from April 1, 1994 to March 31, 2014.

Legend: Incidence rates were directly standardized by age and expressed per 100,000. The solid line represents incidence trends in women. The dotted line represents incidence trends in men.

338x190mm (96 x 96 DPI)

Figure 2a:

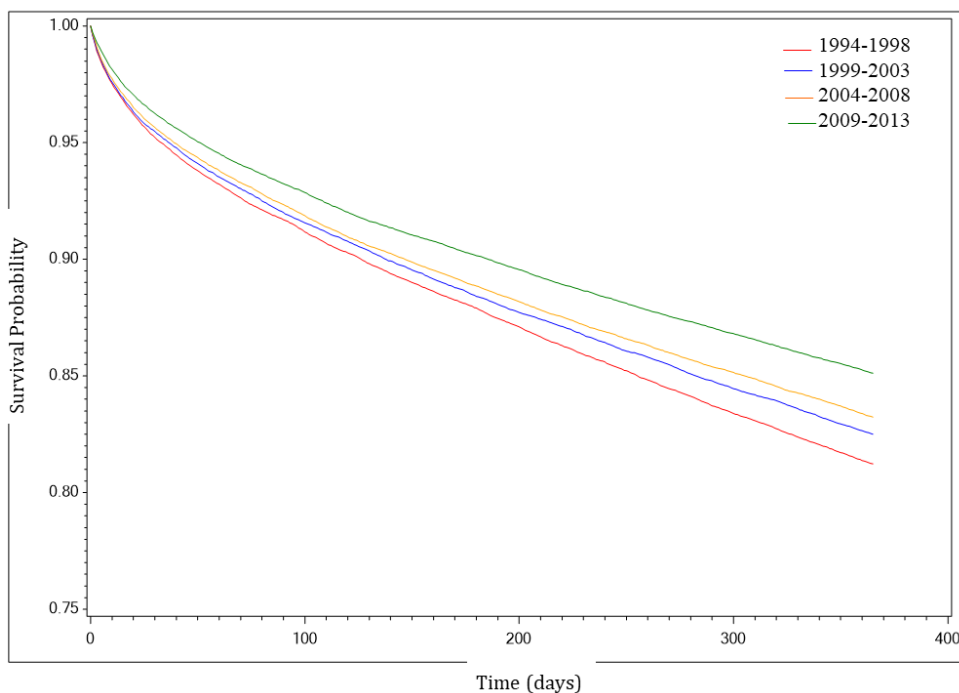

Figure 2b:

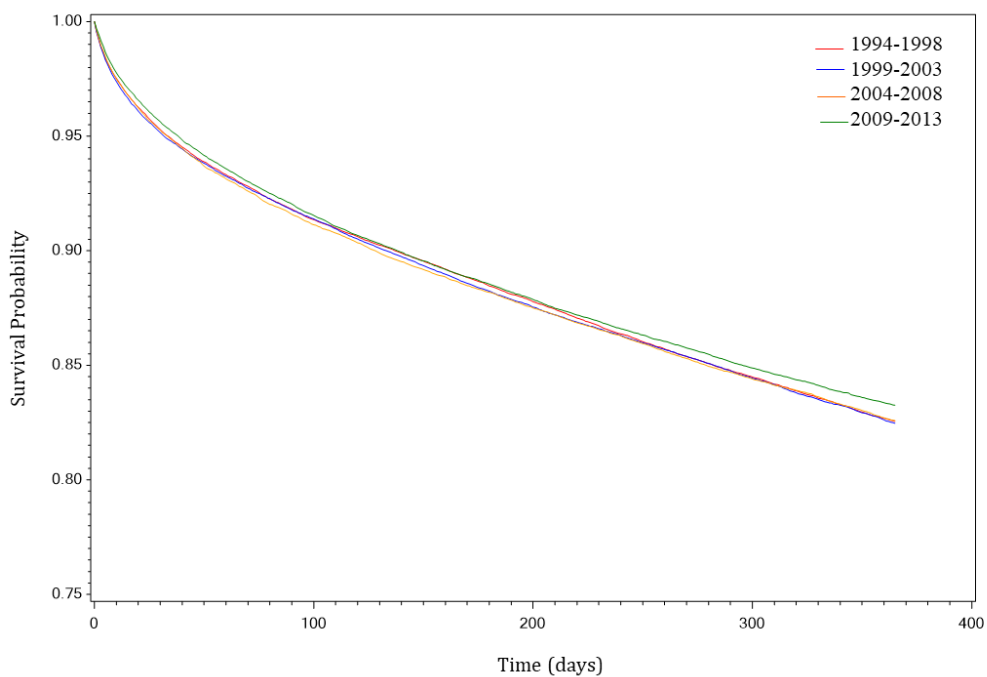

1  
2  
3  
4  
5  
6  
7  
8  
9  
10  
11  
12  
13  
14  
15  
16  
17  
18  
19  
20  
21  
22  
23  
24  
25  
26  
27  
28  
29  
30  
31  
32  
33  
34  
35  
36  
37  
38  
39  
40  
41  
42  
43  
44  
45  
46  
47  
48  
49  
50  
51  
52  
53  
54  
55  
56  
57  
58  
59  
60

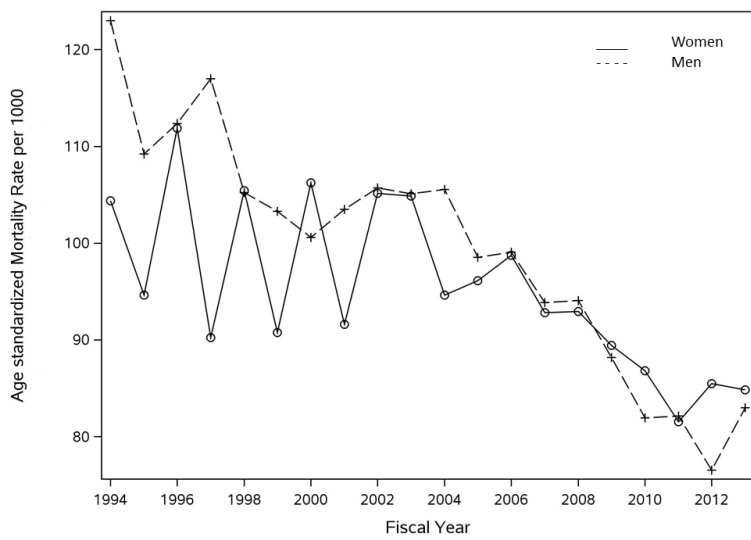

Figure 3. Sex-specific temporal trends in mortality within one year of ambulatory heart failure diagnosis. Legend: Mortality rates were directly standardized by age and expressed per 1000. The solid line represents mortality trends in women. The dotted line represents mortality trends in men.

338x190mm (96 x 96 DPI)

April 1, 1994 – March 31, 1999:

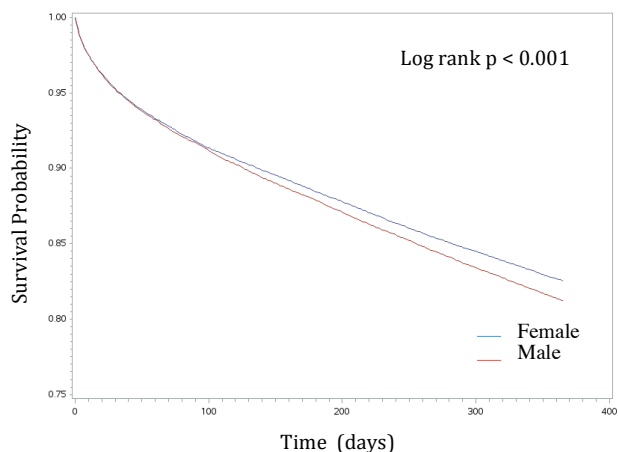

|   |       |       |       |       |   |
|---|-------|-------|-------|-------|---|
| F | 47676 | 43564 | 41852 | 40256 | 0 |
| M | 43907 | 40055 | 38243 | 36604 | 0 |

April 1, 1999 – March 31, 2004:

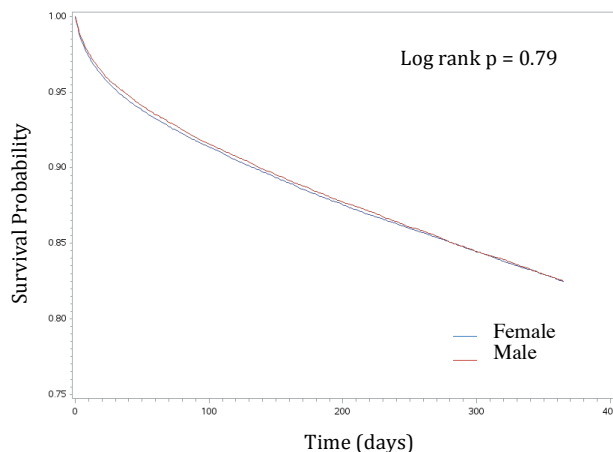

|   |       |       |       |       |   |
|---|-------|-------|-------|-------|---|
| F | 43190 | 39480 | 37814 | 36447 | 0 |
| M | 42108 | 38567 | 36942 | 35548 | 0 |

April 1, 2004 – March 31, 2009:

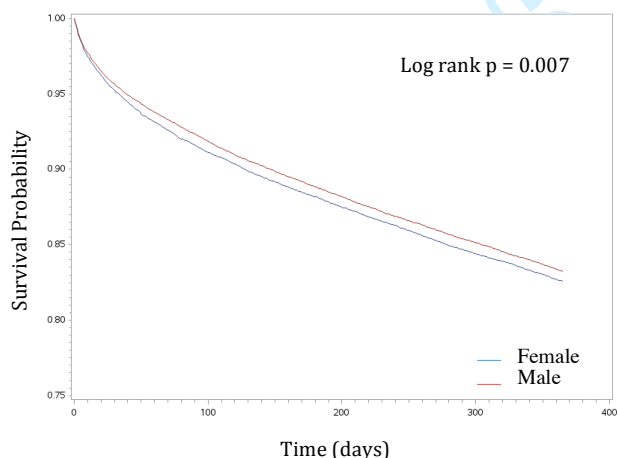

|   |       |       |       |       |   |
|---|-------|-------|-------|-------|---|
| F | 41043 | 37415 | 35917 | 34628 | 0 |
| M | 43698 | 40163 | 38537 | 37182 | 0 |

April 1, 2009 – March 31, 2014:

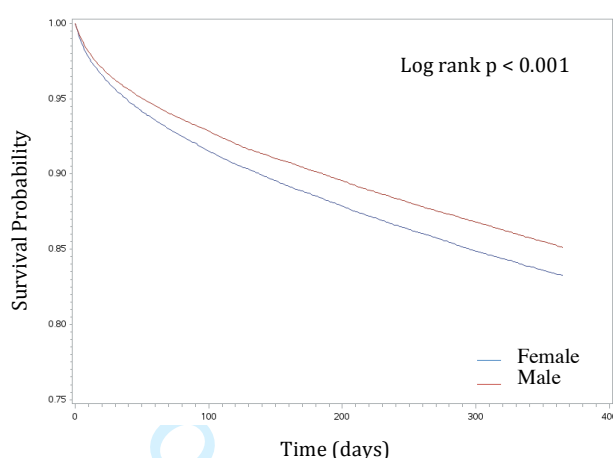

|   |       |       |       |       |   |
|---|-------|-------|-------|-------|---|
| F | 42746 | 39143 | 37564 | 36266 | 0 |
| M | 47961 | 44552 | 42950 | 41620 | 0 |



1  
2  
3  
4  
5  
6  
7  
8  
9  
10  
11  
12  
13  
14  
15  
16  
17  
18  
19  
20  
21  
22  
23  
24  
25  
26  
27  
28  
29  
30  
31  
32  
33  
34  
35  
36  
37  
38  
39  
40  
41  
42  
43  
44  
45  
46  
47  
48  
49  
50  
51  
52  
53  
54  
55  
56  
57  
58  
59  
60

For peer review only

**SUPPLEMENTAL MATERIAL**

eFigure 1. Sex-specific temporal trends in heart failure hospitalizations within one year of ambulatory heart failure diagnosis. Hospitalization rates were directly standardized by age using the 1991 Canadian population aged  $\geq 40$  years as the reference population and expressed per 1000 person-years.

Legend: The solid line represents trends in women. The dotted line represents trends in men.

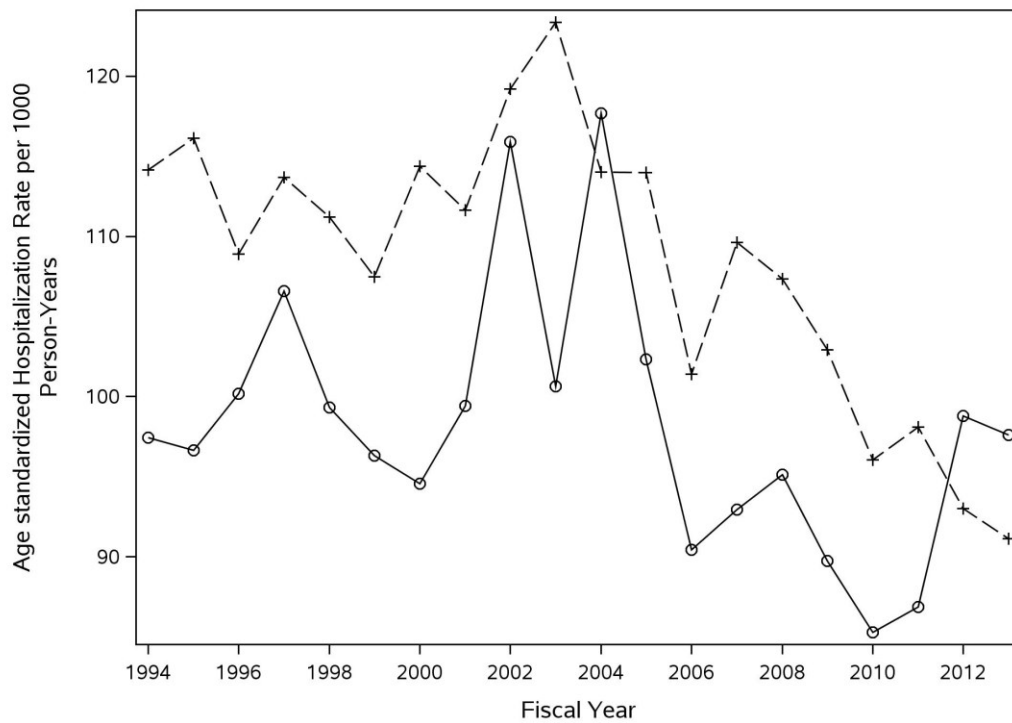

1  
2 eFigure 2a. Stacked cumulative incidence curves representing temporal trends of heart failure hospitalization within one  
3 year of diagnosis in men.

4 Legend: The red line represents cumulative incidence of hospitalization in the historical cohort (1994-1998). The blue line  
5 represents hospitalizations in the 1999-2003 cohort. The orange line represents hospitalizations in the 2004-2008 cohort.  
6 The green line (which is nearly superimposed on the blue line) represents hospitalizations in the modern cohort (2009-  
7 2013).

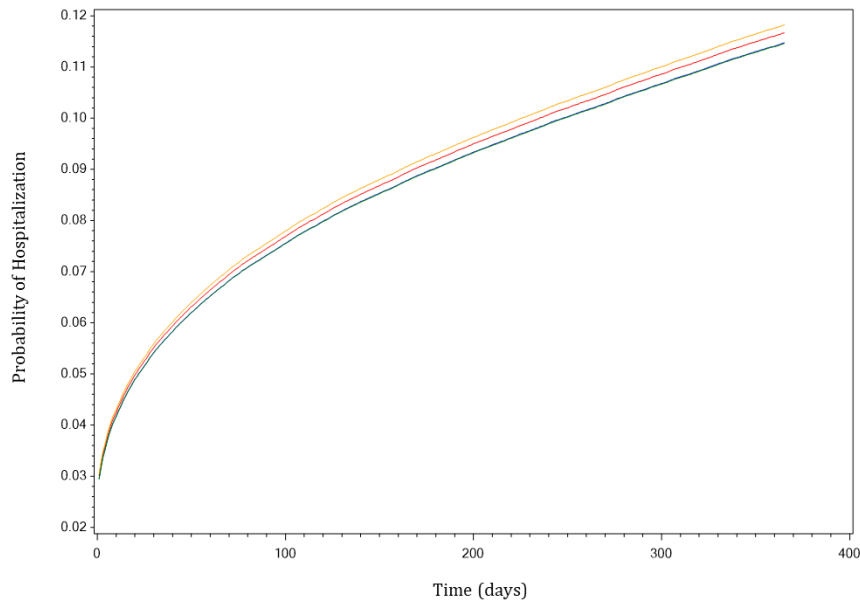

29 eFigure 2b. Stacked cumulative incidence curves representing temporal trends of heart failure hospitalization within one  
30 year of diagnosis in women.

31 Legend: The red line represents cumulative incidence of hospitalization in the historical cohort (1994-1993). The blue line  
32 represents hospitalizations in the 1999-2003 cohort. The orange line represents hospitalizations in the 2004-2008 cohort.  
33 The green line represents hospitalizations in the modern cohort (2009-2013).  
34  
35

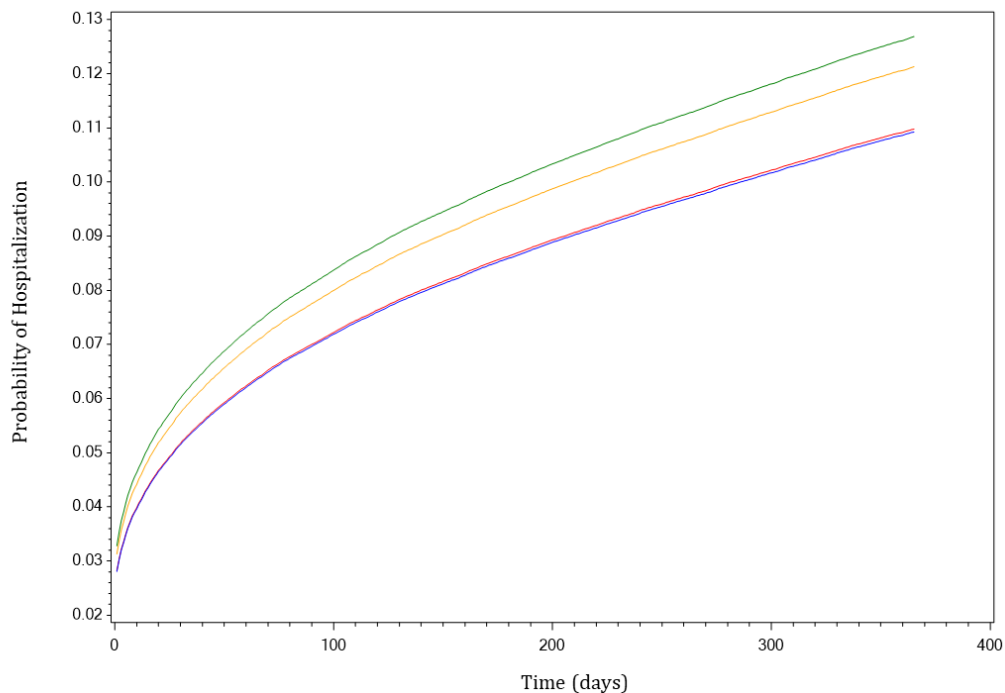

eTable 1. Crude and age standardized incidence rates of ambulatory heart failure per 100,000 population.

| Year | Sex    | HF Cases | Denominator | Incidence Rate |              | 95% CI |        |
|------|--------|----------|-------------|----------------|--------------|--------|--------|
|      |        |          |             | Crude          | Standardized | Lower  | Upper  |
| 1994 | Female | 10123    | 2544992     | 397.76         | 368.95       | 361.74 | 376.27 |
|      | Male   | 8998     | 2290949     | 392.76         | 480.63       | 470.55 | 490.88 |
| 1995 | Female | 9502     | 2615417     | 363.31         | 335.99       | 329.21 | 342.88 |
|      | Male   | 8622     | 2359605     | 365.40         | 445.26       | 435.73 | 454.95 |
| 1996 | Female | 9312     | 2686591     | 346.61         | 319.55       | 313.03 | 326.18 |
|      | Male   | 8621     | 2430438     | 354.71         | 430.39       | 421.20 | 439.74 |
| 1997 | Female | 9518     | 2753376     | 345.68         | 319.39       | 312.93 | 325.94 |
|      | Male   | 8939     | 2497920     | 357.86         | 433.52       | 424.43 | 442.76 |
| 1998 | Female | 9221     | 2815590     | 327.50         | 303.76       | 297.52 | 310.10 |
|      | Male   | 8727     | 2560459     | 340.84         | 411.86       | 403.12 | 420.74 |
| 1999 | Female | 9158     | 2880244     | 317.96         | 294.91       | 288.82 | 301.09 |
|      | Male   | 8810     | 2624357     | 335.70         | 403.94       | 395.42 | 412.61 |
| 2000 | Female | 8921     | 2948815     | 302.53         | 279.98       | 274.11 | 285.94 |
|      | Male   | 8548     | 2693918     | 317.31         | 382.41       | 374.22 | 390.74 |
| 2001 | Female | 8466     | 3018031     | 280.51         | 258.26       | 252.69 | 263.91 |
|      | Male   | 8132     | 2763947     | 294.22         | 351.15       | 343.46 | 358.98 |
| 2002 | Female | 8403     | 3088112     | 272.11         | 249.62       | 244.21 | 255.11 |
|      | Male   | 8441     | 2835687     | 297.67         | 353.43       | 345.83 | 361.16 |
| 2003 | Female | 8242     | 3159200     | 260.89         | 237.25       | 232.05 | 242.53 |
|      | Male   | 8177     | 2908486     | 281.14         | 333.06       | 325.78 | 340.45 |
| 2004 | Female | 8082     | 3226254     | 250.51         | 227.56       | 222.51 | 232.70 |
|      | Male   | 8101     | 2976603     | 272.16         | 320.70       | 313.67 | 327.86 |
| 2005 | Female | 8283     | 3286052     | 252.07         | 229.05       | 224.02 | 234.17 |
|      | Male   | 8588     | 3037995     | 282.69         | 328.77       | 321.77 | 335.87 |
| 2006 | Female | 8107     | 3340543     | 242.69         | 220.03       | 215.14 | 225.01 |
|      | Male   | 8774     | 3091317     | 283.83         | 323.41       | 316.60 | 330.32 |
| 2007 | Female | 7993     | 3388916     | 235.86         | 211.27       | 206.53 | 216.09 |
|      | Male   | 8929     | 3136755     | 284.66         | 318.62       | 311.98 | 325.36 |
| 2008 | Female | 8578     | 3437633     | 249.53         | 222.31       | 217.49 | 227.21 |
|      | Male   | 9306     | 3182320     | 292.43         | 322.03       | 315.46 | 328.71 |
| 2009 | Female | 8433     | 3486229     | 241.89         | 213.46       | 208.78 | 218.22 |
|      | Male   | 9312     | 3225967     | 288.66         | 313.38       | 306.98 | 319.87 |
| 2010 | Female | 8366     | 3534061     | 236.72         | 208.36       | 203.77 | 213.03 |
|      | Male   | 9262     | 3269161     | 283.31         | 301.92       | 295.75 | 308.19 |
| 2011 | Female | 8424     | 3578607     | 235.40         | 201.79       | 197.35 | 206.31 |
|      | Male   | 9292     | 3308050     | 280.89         | 294.17       | 288.17 | 300.26 |
| 2012 | Female | 8526     | 3618133     | 235.65         | 199.93       | 195.55 | 204.39 |
|      | Male   | 9585     | 3341596     | 286.84         | 293.47       | 287.58 | 299.45 |
| 2013 | Female | 8997     | 3653530     | 246.25         | 205.83       | 201.43 | 210.30 |
|      | Male   | 10510    | 3369203     | 311.94         | 312.82       | 306.82 | 318.90 |

HF, heart failure; CI, confidence interval

Table 2. Temporal trends of one-year mortality rates in men and women with incident heart failure.

| Time Cohort           | Sex | Number of Deaths | Number of Incident HF Cases | Crude Rate (%) | Age-Standardized Rate (%; 95% CI) |
|-----------------------|-----|------------------|-----------------------------|----------------|-----------------------------------|
| April 1994-March 1999 | F   | 8319             | 47676                       | 17.5           | 10.1 (9.5-10.8)                   |
|                       | M   | 8238             | 43907                       | 18.8           | 11.4 (10.8-11.9)                  |
| April 1999-March 2004 | F   | 7572             | 43190                       | 17.5           | 9.9 (9.3-10.6)                    |
|                       | M   | 7365             | 42108                       | 17.5           | 10.4 (9.9-10.8)                   |
| April 2004-March 2009 | F   | 7148             | 41043                       | 17.4           | 9.5 (9.0-10.1)                    |
|                       | M   | 7322             | 43698                       | 16.8           | 9.8 (9.4-10.2)                    |
| April 2009-March 2014 | F   | 7156             | 42746                       | 16.8           | 8.6 (8.1-9.0)                     |
|                       | M   | 7138             | 47961                       | 14.9           | 8.2 (7.9-8.6)                     |

HF, heart failure; CI, confidence interval

eTable 3. Crude and age-standardized one-year mortality rates following ambulatory heart failure diagnosis. Rates are expressed per 1000 population.

| Year | Sex    | Deaths | Incident HF Cases | Mortality Rate |              | 95% CI |        |
|------|--------|--------|-------------------|----------------|--------------|--------|--------|
|      |        |        |                   | Crude          | Standardized | Lower  | Upper  |
| 1994 | Female | 1733   | 10123             | 171.19         | 104.40       | 90.54  | 119.78 |
|      | Male   | 1710   | 8998              | 190.04         | 123.00       | 110.57 | 136.45 |
| 1995 | Female | 1629   | 9502              | 171.44         | 94.64        | 82.33  | 108.27 |
|      | Male   | 1578   | 8622              | 183.02         | 109.23       | 97.89  | 121.53 |
| 1996 | Female | 1679   | 9312              | 180.30         | 111.88       | 95.19  | 130.64 |
|      | Male   | 1643   | 8621              | 190.58         | 112.37       | 101.72 | 123.83 |
| 1997 | Female | 1674   | 9518              | 175.88         | 90.24        | 78.73  | 102.95 |
|      | Male   | 1741   | 8939              | 194.76         | 116.99       | 105.34 | 129.56 |
| 1998 | Female | 1604   | 9221              | 173.95         | 105.45       | 92.82  | 119.32 |
|      | Male   | 1566   | 8727              | 179.44         | 105.22       | 94.57  | 116.74 |
| 1999 | Female | 1527   | 9158              | 166.74         | 90.75        | 78.76  | 104.04 |
|      | Male   | 1522   | 8810              | 172.76         | 103.32       | 93.50  | 113.88 |
| 2000 | Female | 1556   | 8921              | 174.42         | 106.23       | 92.32  | 121.65 |
|      | Male   | 1489   | 8548              | 174.19         | 100.59       | 90.80  | 111.15 |
| 2001 | Female | 1473   | 8466              | 173.99         | 91.60        | 79.23  | 105.34 |
|      | Male   | 1364   | 8132              | 167.73         | 103.48       | 92.72  | 115.15 |
| 2002 | Female | 1504   | 8403              | 178.98         | 105.15       | 91.98  | 119.68 |
|      | Male   | 1511   | 8441              | 179.01         | 105.70       | 96.26  | 115.82 |
| 2003 | Female | 1512   | 8242              | 183.45         | 104.88       | 90.32  | 121.12 |
|      | Male   | 1479   | 8177              | 180.87         | 105.10       | 94.47  | 116.60 |
| 2004 | Female | 1468   | 8082              | 181.64         | 94.64        | 82.57  | 107.97 |
|      | Male   | 1486   | 8101              | 183.43         | 105.57       | 95.67  | 116.22 |
| 2005 | Female | 1445   | 8283              | 174.45         | 96.12        | 83.52  | 110.08 |
|      | Male   | 1454   | 8588              | 169.31         | 98.53        | 88.69  | 109.16 |
| 2006 | Female | 1395   | 8107              | 172.07         | 98.75        | 86.46  | 112.30 |
|      | Male   | 1459   | 8774              | 166.29         | 99.06        | 89.97  | 108.82 |
| 2007 | Female | 1384   | 7993              | 173.15         | 92.81        | 81.59  | 105.15 |
|      | Male   | 1475   | 8929              | 165.19         | 93.86        | 85.68  | 102.61 |
| 2008 | Female | 1456   | 8578              | 169.74         | 92.93        | 82.04  | 104.86 |
|      | Male   | 1448   | 9306              | 155.60         | 94.08        | 85.56  | 103.21 |
| 2009 | Female | 1464   | 8433              | 173.60         | 89.43        | 79.65  | 100.09 |
|      | Male   | 1461   | 9312              | 156.89         | 88.17        | 80.01  | 96.95  |
| 2010 | Female | 1373   | 8366              | 164.12         | 86.81        | 76.58  | 98.03  |
|      | Male   | 1396   | 9262              | 150.72         | 81.93        | 74.92  | 89.43  |
| 2011 | Female | 1418   | 8424              | 168.33         | 81.54        | 71.43  | 92.68  |
|      | Male   | 1381   | 9292              | 148.62         | 82.13        | 74.91  | 89.87  |
| 2012 | Female | 1404   | 8526              | 164.67         | 85.48        | 75.84  | 96.01  |
|      | Male   | 1377   | 9585              | 143.66         | 76.53        | 69.60  | 83.97  |
| 2013 | Female | 1497   | 8997              | 166.39         | 84.84        | 75.24  | 95.32  |
|      | Male   | 1523   | 10510             | 144.91         | 82.99        | 75.34  | 91.22  |

CI, confidence interval

eTable 4. Crude and age standardized one-year heart failure hospitalization rates in patients who were diagnosed with heart failure in an ambulatory setting between 1994-2013. Rate is expressed per 1000 person years.

| Year | Sex    | Heart Failure    |             | Hospitalization Rate |              | 95% CI |        |
|------|--------|------------------|-------------|----------------------|--------------|--------|--------|
|      |        | Hospitalizations | Denominator | Crude                | Standardized | Lower  | Upper  |
| 1994 | Female | 1105             | 8417.52     | 131.27               | 97.43        | 83.29  | 113.28 |
|      | Male   | 1108             | 7325.60     | 151.25               | 114.15       | 101.01 | 128.52 |
| 1995 | Female | 1067             | 7860.78     | 135.74               | 96.64        | 83.94  | 110.71 |
|      | Male   | 1001             | 7065.84     | 141.67               | 116.14       | 100.74 | 133.23 |
| 1996 | Female | 1065             | 7632.79     | 139.53               | 100.19       | 85.97  | 116.09 |
|      | Male   | 1015             | 7022.96     | 144.53               | 108.91       | 96.08  | 122.98 |
| 1997 | Female | 1028             | 7859.13     | 130.80               | 106.59       | 90.03  | 125.30 |
|      | Male   | 1082             | 7232.55     | 149.60               | 113.69       | 100.95 | 127.59 |
| 1998 | Female | 1006             | 7603.66     | 132.30               | 99.32        | 85.96  | 114.16 |
|      | Male   | 963              | 7180.72     | 134.11               | 111.22       | 97.10  | 126.82 |
| 1999 | Female | 983              | 7607.15     | 129.22               | 96.32        | 82.75  | 111.47 |
|      | Male   | 936              | 7305.04     | 128.13               | 107.48       | 95.17  | 120.95 |
| 2000 | Female | 917              | 7402.64     | 123.87               | 94.57        | 80.28  | 110.67 |
|      | Male   | 994              | 7033.00     | 141.33               | 114.37       | 101.66 | 128.24 |
| 2001 | Female | 903              | 6997.61     | 129.04               | 99.40        | 84.75  | 115.86 |
|      | Male   | 901              | 6711.51     | 134.25               | 111.64       | 97.95  | 126.71 |
| 2002 | Female | 937              | 6838.58     | 137.02               | 115.90       | 100.22 | 133.33 |
|      | Male   | 1007             | 6854.11     | 146.92               | 119.20       | 106.86 | 132.57 |
| 2003 | Female | 994              | 6645.28     | 149.58               | 100.66       | 86.86  | 116.02 |
|      | Male   | 1016             | 6629.94     | 153.24               | 123.36       | 110.31 | 137.54 |
| 2004 | Female | 1002             | 6508.80     | 153.95               | 117.67       | 101.49 | 135.69 |
|      | Male   | 993              | 6504.80     | 152.66               | 114.02       | 102.01 | 127.06 |
| 2005 | Female | 962              | 6775.02     | 141.99               | 102.34       | 88.21  | 118.09 |
|      | Male   | 1026             | 7052.13     | 145.49               | 113.98       | 101.59 | 127.48 |
| 2006 | Female | 982              | 6565.14     | 149.58               | 90.43        | 78.78  | 103.32 |
|      | Male   | 989              | 7237.69     | 136.65               | 101.40       | 90.93  | 112.73 |
| 2007 | Female | 987              | 6493.03     | 152.01               | 92.95        | 81.45  | 105.61 |
|      | Male   | 1069             | 7307.83     | 146.28               | 109.62       | 98.84  | 121.25 |
| 2008 | Female | 1046             | 6963.90     | 150.20               | 95.11        | 83.30  | 108.13 |
|      | Male   | 1097             | 7646.02     | 143.47               | 107.36       | 97.12  | 118.38 |
| 2009 | Female | 1021             | 6841.22     | 149.24               | 89.74        | 79.39  | 101.06 |
|      | Male   | 1085             | 7697.71     | 140.95               | 102.92       | 92.38  | 114.34 |
| 2010 | Female | 1042             | 6799.72     | 153.24               | 85.28        | 75.41  | 96.08  |
|      | Male   | 1078             | 7694.92     | 140.09               | 96.05        | 86.94  | 105.86 |
| 2011 | Female | 1061             | 6842.81     | 155.05               | 86.86        | 76.87  | 97.78  |
|      | Male   | 1038             | 7754.49     | 133.86               | 98.10        | 87.99  | 109.06 |
| 2012 | Female | 1137             | 6895.19     | 164.90               | 98.80        | 87.24  | 111.46 |
|      | Male   | 1097             | 8017.47     | 136.83               | 93.00        | 84.28  | 102.37 |
| 2013 | Female | 1159             | 7269.34     | 159.44               | 97.59        | 86.03  | 110.27 |
|      | Male   | 1205             | 8772.03     | 137.37               | 91.14        | 82.26  | 100.71 |

CI, confidence interval

STROBE Statement—Checklist of items that should be included in reports of *cohort studies*

|                              | Item No | Recommendation                                                                                                                                                                                                                                                                                                         | Page No           |
|------------------------------|---------|------------------------------------------------------------------------------------------------------------------------------------------------------------------------------------------------------------------------------------------------------------------------------------------------------------------------|-------------------|
| <b>Title and abstract</b>    | 1       | (a) Indicate the study's design with a commonly used term in the title or the abstract<br>(b) Provide in the abstract an informative and balanced summary of what was done and what was found                                                                                                                          | Title page<br>2   |
| <b>Introduction</b>          |         |                                                                                                                                                                                                                                                                                                                        |                   |
| Background/rationale         | 2       | Explain the scientific background and rationale for the investigation being reported                                                                                                                                                                                                                                   | 4                 |
| Objectives                   | 3       | State specific objectives, including any prespecified hypotheses                                                                                                                                                                                                                                                       | 4                 |
| <b>Methods</b>               |         |                                                                                                                                                                                                                                                                                                                        |                   |
| Study design                 | 4       | Present key elements of study design early in the paper                                                                                                                                                                                                                                                                | 5                 |
| Setting                      | 5       | Describe the setting, locations, and relevant dates, including periods of recruitment, exposure, follow-up, and data collection                                                                                                                                                                                        | 5                 |
| Participants                 | 6       | (a) Give the eligibility criteria, and the sources and methods of selection of participants. Describe methods of follow-up<br>(b) For matched studies, give matching criteria and number of exposed and unexposed                                                                                                      | 5<br>N/A          |
| Variables                    | 7       | Clearly define all outcomes, exposures, predictors, potential confounders, and effect modifiers. Give diagnostic criteria, if applicable                                                                                                                                                                               | 6                 |
| Data sources/<br>measurement | 8*      | For each variable of interest, give sources of data and details of methods of assessment (measurement). Describe comparability of assessment methods if there is more than one group                                                                                                                                   | 5-6               |
| Bias                         | 9       | Describe any efforts to address potential sources of bias                                                                                                                                                                                                                                                              | 6-7               |
| Study size                   | 10      | Explain how the study size was arrived at                                                                                                                                                                                                                                                                              | 5                 |
| Quantitative variables       | 11      | Explain how quantitative variables were handled in the analyses. If applicable, describe which groupings were chosen and why                                                                                                                                                                                           | 6-7               |
| Statistical methods          | 12      | (a) Describe all statistical methods, including those used to control for confounding<br>(b) Describe any methods used to examine subgroups and interactions<br>(c) Explain how missing data were addressed<br>(d) If applicable, explain how loss to follow-up was addressed<br>(e) Describe any sensitivity analyses | 6-7               |
| <b>Results</b>               |         |                                                                                                                                                                                                                                                                                                                        |                   |
| Participants                 | 13*     | (a) Report numbers of individuals at each stage of study—eg numbers potentially eligible, examined for eligibility, confirmed eligible, included in the study, completing follow-up, and analysed<br>(b) Give reasons for non-participation at each stage<br>(c) Consider use of a flow diagram                        | 7<br>7<br>N/A     |
| Descriptive data             | 14*     | (a) Give characteristics of study participants (eg demographic, clinical, social) and information on exposures and potential confounders<br>(b) Indicate number of participants with missing data for each variable of interest<br>(c) Summarise follow-up time (eg, average and total amount)                         | 8<br>Table 1<br>8 |
| Outcome data                 | 15*     | Report numbers of outcome events or summary measures over time                                                                                                                                                                                                                                                         | 8-10              |
| Main results                 | 16      | (a) Give unadjusted estimates and, if applicable, confounder-adjusted estimates and their                                                                                                                                                                                                                              | 8-10              |



|    |                          |                                                                                           |       |
|----|--------------------------|-------------------------------------------------------------------------------------------|-------|
| 1  |                          | precision (eg, 95% confidence interval). Make clear which confounders were adjusted for   |       |
| 2  |                          | and why they were included                                                                |       |
| 3  |                          | (b) Report category boundaries when continuous variables were categorized                 | Table |
| 4  |                          |                                                                                           | 1     |
| 5  |                          | (c) If relevant, consider translating estimates of relative risk into absolute risk for a |       |
| 6  |                          | meaningful time period                                                                    | N/A   |
| 7  |                          |                                                                                           |       |
| 8  | Other analyses           | 17 Report other analyses done—eg analyses of subgroups and interactions, and sensitivity  | N/A   |
| 9  |                          | analyses                                                                                  |       |
| 10 |                          |                                                                                           |       |
| 11 | <b>Discussion</b>        |                                                                                           |       |
| 12 | Key results              | 18 Summarise key results with reference to study objectives                               | 11    |
| 13 | Limitations              | 19 Discuss limitations of the study, taking into account sources of potential bias or     | 15    |
| 14 |                          | imprecision. Discuss both direction and magnitude of any potential bias                   |       |
| 15 |                          |                                                                                           |       |
| 16 | Interpretation           | 20 Give a cautious overall interpretation of results considering objectives, limitations, | 11-15 |
| 17 |                          | multiplicity of analyses, results from similar studies, and other relevant evidence       |       |
| 18 |                          |                                                                                           |       |
| 19 | Generalisability         | 21 Discuss the generalisability (external validity) of the study results                  | 15    |
| 20 |                          |                                                                                           |       |
| 21 | <b>Other information</b> |                                                                                           |       |
| 22 | Funding                  | 22 Give the source of funding and the role of the funders for the present study and, if   | 16-17 |
| 23 |                          | applicable, for the original study on which the present article is based                  |       |

\*Give information separately for exposed and unexposed groups.

**Note:** An Explanation and Elaboration article discusses each checklist item and gives methodological background and published examples of transparent reporting. The STROBE checklist is best used in conjunction with this article (freely available on the Web sites of PLoS Medicine at <http://www.plosmedicine.org/>, Annals of Internal Medicine at <http://www.annals.org/>, and Epidemiology at <http://www.epidem.com/>). Information on the STROBE Initiative is available at <http://www.strobe-statement.org>.
