# Supplementary material for: Sex-specific temporal trends in ambulatory heart failure incidence, mortality and hospitalisation in Ontario, Canada from 1994 to 2013: a population-based cohort study
Source: PubMed Central journal article supplement — BMJ Open. 2020 Nov 26;10(11):e044126. doi: 10.1136/bmjopen-2020-044126 (PMC7692840; doi:10.1136/bmjopen-2020-044126), 2020-11-26
Supplement: bmjopen-2020-044126supp001.pdf [file bmjopen-2020-044126supp001.pdf]

**SUPPLEMENTAL MATERIAL**

Figure 1. Sex-specific temporal trends in heart failure hospitalizations within one year of ambulatory heart failure diagnosis. Hospitalization rates were directly standardized by age using the 1991 Canadian population aged  $\geq 40$  years as the reference population and expressed per 1000 person-years.

**Legend:** The solid line represents trends in women. The dotted line represents trends in men.

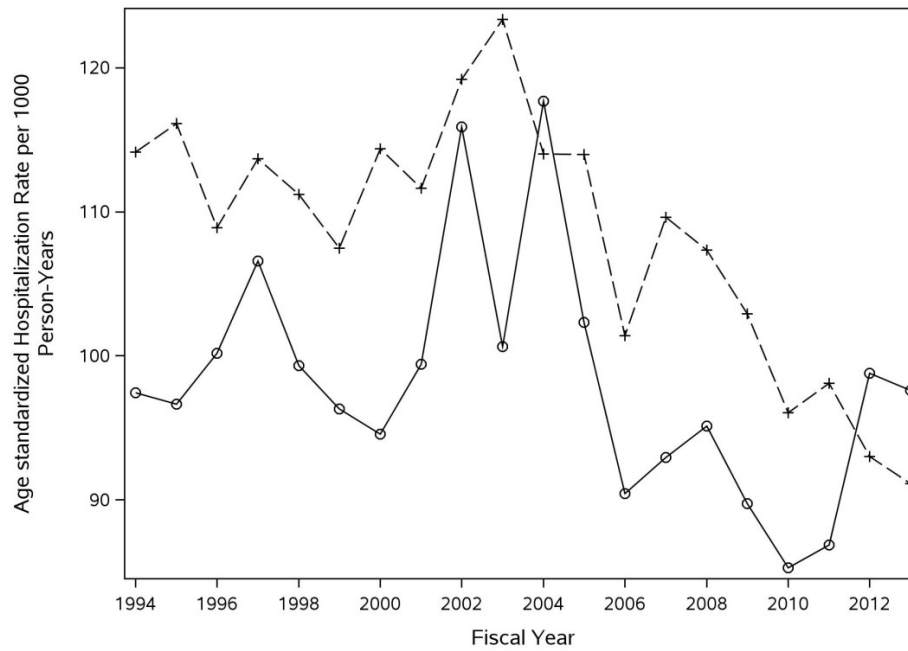

eFigure 2a. Stacked cumulative incidence curves representing temporal trends of heart failure hospitalization within one year of diagnosis in men.

**Legend:** The red line represents cumulative incidence of hospitalization in the historical cohort (1994-1998). The blue line represents hospitalizations in the 1999-2003 cohort. The orange line represents hospitalizations in the 2004-2008 cohort. The green line (which is nearly superimposed on the blue line) represents hospitalizations in the modern cohort (2009-2013).

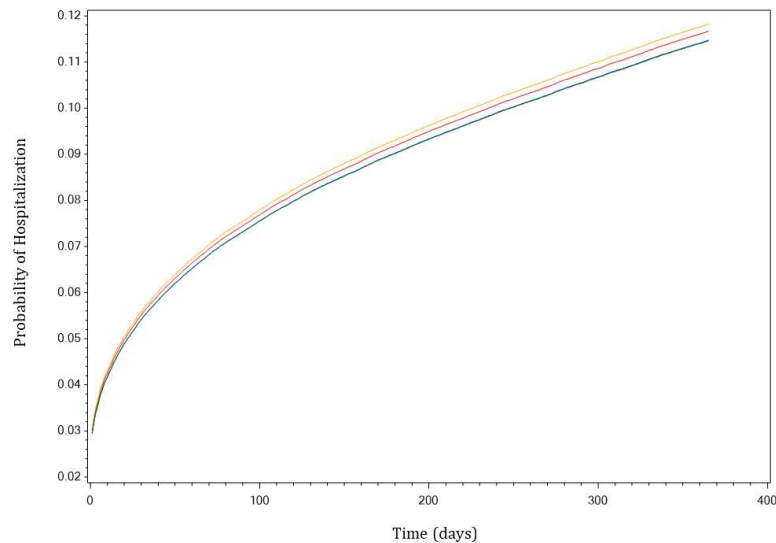

eFigure 2b. Stacked cumulative incidence curves representing temporal trends of heart failure hospitalization within one year of diagnosis in women.

**Legend:** The red line represents cumulative incidence of hospitalization in the historical cohort (1994-1993). The blue line represents hospitalizations in the 1999-2003 cohort. The orange line represents hospitalizations in the 2004-2008 cohort. The green line represents hospitalizations in the modern cohort (2009-2013).

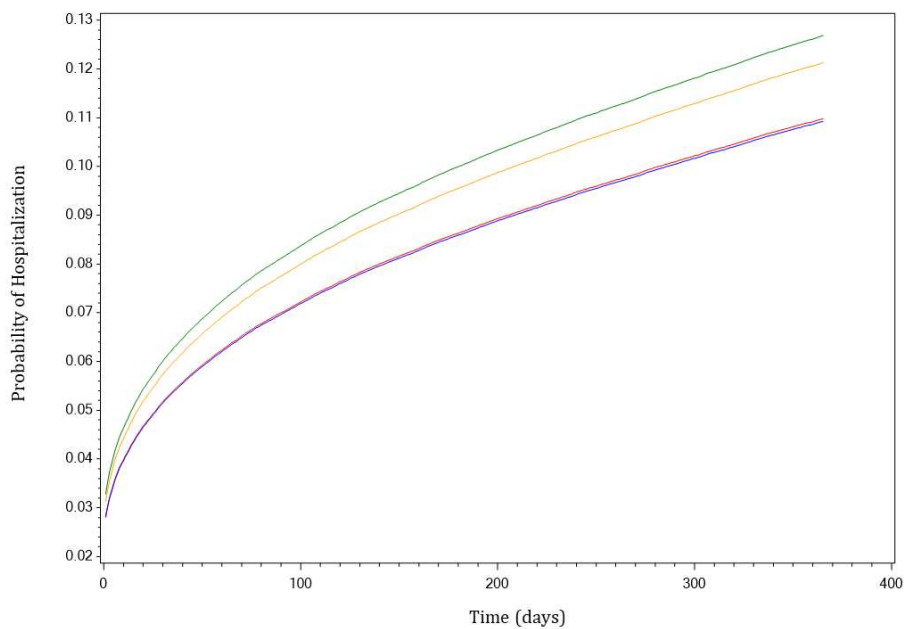

eTable 1. Crude and age standardized incidence rates of ambulatory heart failure per 100,000 population.

| Year | Sex    | HF Cases | Denominator | Incidence Rate |              | 95% CI |        |
|------|--------|----------|-------------|----------------|--------------|--------|--------|
|      |        |          |             | Crude          | Standardized | Lower  | Upper  |
| 1994 | Female | 10123    | 2544992     | 397.76         | 368.95       | 361.74 | 376.27 |
|      | Male   | 8998     | 2290949     | 392.76         | 480.63       | 470.55 | 490.88 |
| 1995 | Female | 9502     | 2615417     | 363.31         | 335.99       | 329.21 | 342.88 |
|      | Male   | 8622     | 2359605     | 365.40         | 445.26       | 435.73 | 454.95 |
| 1996 | Female | 9312     | 2686591     | 346.61         | 319.55       | 313.03 | 326.18 |
|      | Male   | 8621     | 2430438     | 354.71         | 430.39       | 421.20 | 439.74 |
| 1997 | Female | 9518     | 2753376     | 345.68         | 319.39       | 312.93 | 325.94 |
|      | Male   | 8939     | 2497920     | 357.86         | 433.52       | 424.43 | 442.76 |
| 1998 | Female | 9221     | 2815590     | 327.50         | 303.76       | 297.52 | 310.10 |
|      | Male   | 8727     | 2560459     | 340.84         | 411.86       | 403.12 | 420.74 |
| 1999 | Female | 9158     | 2880244     | 317.96         | 294.91       | 288.82 | 301.09 |
|      | Male   | 8810     | 2624357     | 335.70         | 403.94       | 395.42 | 412.61 |
| 2000 | Female | 8921     | 2948815     | 302.53         | 279.98       | 274.11 | 285.94 |
|      | Male   | 8548     | 2693918     | 317.31         | 382.41       | 374.22 | 390.74 |
| 2001 | Female | 8466     | 3018031     | 280.51         | 258.26       | 252.69 | 263.91 |
|      | Male   | 8132     | 2763947     | 294.22         | 351.15       | 343.46 | 358.98 |
| 2002 | Female | 8403     | 3088112     | 272.11         | 249.62       | 244.21 | 255.11 |
|      | Male   | 8441     | 2835687     | 297.67         | 353.43       | 345.83 | 361.16 |
| 2003 | Female | 8242     | 3159200     | 260.89         | 237.25       | 232.05 | 242.53 |
|      | Male   | 8177     | 2908486     | 281.14         | 333.06       | 325.78 | 340.45 |
| 2004 | Female | 8082     | 3226254     | 250.51         | 227.56       | 222.51 | 232.70 |
|      | Male   | 8101     | 2976603     | 272.16         | 320.70       | 313.67 | 327.86 |
| 2005 | Female | 8283     | 3286052     | 252.07         | 229.05       | 224.02 | 234.17 |
|      | Male   | 8588     | 3037995     | 282.69         | 328.77       | 321.77 | 335.87 |
| 2006 | Female | 8107     | 3340543     | 242.69         | 220.03       | 215.14 | 225.01 |
|      | Male   | 8774     | 3091317     | 283.83         | 323.41       | 316.60 | 330.32 |
| 2007 | Female | 7993     | 3388916     | 235.86         | 211.27       | 206.53 | 216.09 |
|      | Male   | 8929     | 3136755     | 284.66         | 318.62       | 311.98 | 325.36 |
| 2008 | Female | 8578     | 3437633     | 249.53         | 222.31       | 217.49 | 227.21 |
|      | Male   | 9306     | 3182320     | 292.43         | 322.03       | 315.46 | 328.71 |
| 2009 | Female | 8433     | 3486229     | 241.89         | 213.46       | 208.78 | 218.22 |
|      | Male   | 9312     | 3225967     | 288.66         | 313.38       | 306.98 | 319.87 |
| 2010 | Female | 8366     | 3534061     | 236.72         | 208.36       | 203.77 | 213.03 |
|      | Male   | 9262     | 3269161     | 283.31         | 301.92       | 295.75 | 308.19 |
| 2011 | Female | 8424     | 3578607     | 235.40         | 201.79       | 197.35 | 206.31 |
|      | Male   | 9292     | 3308050     | 280.89         | 294.17       | 288.17 | 300.26 |
| 2012 | Female | 8526     | 3618133     | 235.65         | 199.93       | 195.55 | 204.39 |
|      | Male   | 9585     | 3341596     | 286.84         | 293.47       | 287.58 | 299.45 |
| 2013 | Female | 8997     | 3653530     | 246.25         | 205.83       | 201.43 | 210.30 |
|      | Male   | 10510    | 3369203     | 311.94         | 312.82       | 306.82 | 318.90 |

HF, heart failure; CI, confidence interval

eTable 2. Temporal trends of one-year mortality rates in men and women with incident heart failure.

| <b>Time Cohort</b>           | <b>Sex</b> | <b>Number of Deaths</b> | <b>Number of Incident HF Cases</b> | <b>Crude Rate (%)</b> | <b>Age-Standardized Rate (%; 95% CI)</b> |
|------------------------------|------------|-------------------------|------------------------------------|-----------------------|------------------------------------------|
| <b>April 1994-March 1999</b> | F          | 8319                    | 47676                              | 17.5                  | 10.1 (9.5-10.8)                          |
|                              | M          | 8238                    | 43907                              | 18.8                  | 11.4 (10.8-11.9)                         |
| <b>April 1999-March 2004</b> | F          | 7572                    | 43190                              | 17.5                  | 9.9 (9.3-10.6)                           |
|                              | M          | 7365                    | 42108                              | 17.5                  | 10.4 (9.9-10.8)                          |
| <b>April 2004-March 2009</b> | F          | 7148                    | 41043                              | 17.4                  | 9.5 (9.0-10.1)                           |
|                              | M          | 7322                    | 43698                              | 16.8                  | 9.8 (9.4-10.2)                           |
| <b>April 2009-March 2014</b> | F          | 7156                    | 42746                              | 16.8                  | 8.6 (8.1-9.0)                            |
|                              | M          | 7138                    | 47961                              | 14.9                  | 8.2 (7.9-8.6)                            |

HF, heart failure; CI, confidence interval

eTable 3. Crude and age-standardized one-year mortality rates following ambulatory heart failure diagnosis. Rates are expressed per 1000 population.

| Year | Sex    | Deaths | Incident HF Cases | Mortality Rate |              | 95% CI |        |
|------|--------|--------|-------------------|----------------|--------------|--------|--------|
|      |        |        |                   | Crude          | Standardized | Lower  | Upper  |
| 1994 | Female | 1733   | 10123             | 171.19         | 104.40       | 90.54  | 119.78 |
|      | Male   | 1710   | 8998              | 190.04         | 123.00       | 110.57 | 136.45 |
| 1995 | Female | 1629   | 9502              | 171.44         | 94.64        | 82.33  | 108.27 |
|      | Male   | 1578   | 8622              | 183.02         | 109.23       | 97.89  | 121.53 |
| 1996 | Female | 1679   | 9312              | 180.30         | 111.88       | 95.19  | 130.64 |
|      | Male   | 1643   | 8621              | 190.58         | 112.37       | 101.72 | 123.83 |
| 1997 | Female | 1674   | 9518              | 175.88         | 90.24        | 78.73  | 102.95 |
|      | Male   | 1741   | 8939              | 194.76         | 116.99       | 105.34 | 129.56 |
| 1998 | Female | 1604   | 9221              | 173.95         | 105.45       | 92.82  | 119.32 |
|      | Male   | 1566   | 8727              | 179.44         | 105.22       | 94.57  | 116.74 |
| 1999 | Female | 1527   | 9158              | 166.74         | 90.75        | 78.76  | 104.04 |
|      | Male   | 1522   | 8810              | 172.76         | 103.32       | 93.50  | 113.88 |
| 2000 | Female | 1556   | 8921              | 174.42         | 106.23       | 92.32  | 121.65 |
|      | Male   | 1489   | 8548              | 174.19         | 100.59       | 90.80  | 111.15 |
| 2001 | Female | 1473   | 8466              | 173.99         | 91.60        | 79.23  | 105.34 |
|      | Male   | 1364   | 8132              | 167.73         | 103.48       | 92.72  | 115.15 |
| 2002 | Female | 1504   | 8403              | 178.98         | 105.15       | 91.98  | 119.68 |
|      | Male   | 1511   | 8441              | 179.01         | 105.70       | 96.26  | 115.82 |
| 2003 | Female | 1512   | 8242              | 183.45         | 104.88       | 90.32  | 121.12 |
|      | Male   | 1479   | 8177              | 180.87         | 105.10       | 94.47  | 116.60 |
| 2004 | Female | 1468   | 8082              | 181.64         | 94.64        | 82.57  | 107.97 |
|      | Male   | 1486   | 8101              | 183.43         | 105.57       | 95.67  | 116.22 |
| 2005 | Female | 1445   | 8283              | 174.45         | 96.12        | 83.52  | 110.08 |
|      | Male   | 1454   | 8588              | 169.31         | 98.53        | 88.69  | 109.16 |
| 2006 | Female | 1395   | 8107              | 172.07         | 98.75        | 86.46  | 112.30 |
|      | Male   | 1459   | 8774              | 166.29         | 99.06        | 89.97  | 108.82 |
| 2007 | Female | 1384   | 7993              | 173.15         | 92.81        | 81.59  | 105.15 |
|      | Male   | 1475   | 8929              | 165.19         | 93.86        | 85.68  | 102.61 |
| 2008 | Female | 1456   | 8578              | 169.74         | 92.93        | 82.04  | 104.86 |
|      | Male   | 1448   | 9306              | 155.60         | 94.08        | 85.56  | 103.21 |
| 2009 | Female | 1464   | 8433              | 173.60         | 89.43        | 79.65  | 100.09 |
|      | Male   | 1461   | 9312              | 156.89         | 88.17        | 80.01  | 96.95  |
| 2010 | Female | 1373   | 8366              | 164.12         | 86.81        | 76.58  | 98.03  |
|      | Male   | 1396   | 9262              | 150.72         | 81.93        | 74.92  | 89.43  |
| 2011 | Female | 1418   | 8424              | 168.33         | 81.54        | 71.43  | 92.68  |
|      | Male   | 1381   | 9292              | 148.62         | 82.13        | 74.91  | 89.87  |
| 2012 | Female | 1404   | 8526              | 164.67         | 85.48        | 75.84  | 96.01  |
|      | Male   | 1377   | 9585              | 143.66         | 76.53        | 69.60  | 83.97  |
| 2013 | Female | 1497   | 8997              | 166.39         | 84.84        | 75.24  | 95.32  |
|      | Male   | 1523   | 10510             | 144.91         | 82.99        | 75.34  | 91.22  |

CI, confidence interval

eTable 4. Crude and age standardized one-year heart failure hospitalization rates in patients who were diagnosed with heart failure in an ambulatory setting between 1994-2013. Rate is expressed per 1000 person years.

| Year | Sex    | Heart Failure    |             | Hospitalization Rate |              | 95% CI |        |
|------|--------|------------------|-------------|----------------------|--------------|--------|--------|
|      |        | Hospitalizations | Denominator | Crude                | Standardized | Lower  | Upper  |
| 1994 | Female | 1105             | 8417.52     | 131.27               | 97.43        | 83.29  | 113.28 |
|      | Male   | 1108             | 7325.60     | 151.25               | 114.15       | 101.01 | 128.52 |
| 1995 | Female | 1067             | 7860.78     | 135.74               | 96.64        | 83.94  | 110.71 |
|      | Male   | 1001             | 7065.84     | 141.67               | 116.14       | 100.74 | 133.23 |
| 1996 | Female | 1065             | 7632.79     | 139.53               | 100.19       | 85.97  | 116.09 |
|      | Male   | 1015             | 7022.96     | 144.53               | 108.91       | 96.08  | 122.98 |
| 1997 | Female | 1028             | 7859.13     | 130.80               | 106.59       | 90.03  | 125.30 |
|      | Male   | 1082             | 7232.55     | 149.60               | 113.69       | 100.95 | 127.59 |
| 1998 | Female | 1006             | 7603.66     | 132.30               | 99.32        | 85.96  | 114.16 |
|      | Male   | 963              | 7180.72     | 134.11               | 111.22       | 97.10  | 126.82 |
| 1999 | Female | 983              | 7607.15     | 129.22               | 96.32        | 82.75  | 111.47 |
|      | Male   | 936              | 7305.04     | 128.13               | 107.48       | 95.17  | 120.95 |
| 2000 | Female | 917              | 7402.64     | 123.87               | 94.57        | 80.28  | 110.67 |
|      | Male   | 994              | 7033.00     | 141.33               | 114.37       | 101.66 | 128.24 |
| 2001 | Female | 903              | 6997.61     | 129.04               | 99.40        | 84.75  | 115.86 |
|      | Male   | 901              | 6711.51     | 134.25               | 111.64       | 97.95  | 126.71 |
| 2002 | Female | 937              | 6838.58     | 137.02               | 115.90       | 100.22 | 133.33 |
|      | Male   | 1007             | 6854.11     | 146.92               | 119.20       | 106.86 | 132.57 |
| 2003 | Female | 994              | 6645.28     | 149.58               | 100.66       | 86.86  | 116.02 |
|      | Male   | 1016             | 6629.94     | 153.24               | 123.36       | 110.31 | 137.54 |
| 2004 | Female | 1002             | 6508.80     | 153.95               | 117.67       | 101.49 | 135.69 |
|      | Male   | 993              | 6504.80     | 152.66               | 114.02       | 102.01 | 127.06 |
| 2005 | Female | 962              | 6775.02     | 141.99               | 102.34       | 88.21  | 118.09 |
|      | Male   | 1026             | 7052.13     | 145.49               | 113.98       | 101.59 | 127.48 |
| 2006 | Female | 982              | 6565.14     | 149.58               | 90.43        | 78.78  | 103.32 |
|      | Male   | 989              | 7237.69     | 136.65               | 101.40       | 90.93  | 112.73 |
| 2007 | Female | 987              | 6493.03     | 152.01               | 92.95        | 81.45  | 105.61 |
|      | Male   | 1069             | 7307.83     | 146.28               | 109.62       | 98.84  | 121.25 |
| 2008 | Female | 1046             | 6963.90     | 150.20               | 95.11        | 83.30  | 108.13 |
|      | Male   | 1097             | 7646.02     | 143.47               | 107.36       | 97.12  | 118.38 |
| 2009 | Female | 1021             | 6841.22     | 149.24               | 89.74        | 79.39  | 101.06 |
|      | Male   | 1085             | 7697.71     | 140.95               | 102.92       | 92.38  | 114.34 |
| 2010 | Female | 1042             | 6799.72     | 153.24               | 85.28        | 75.41  | 96.08  |
|      | Male   | 1078             | 7694.92     | 140.09               | 96.05        | 86.94  | 105.86 |
| 2011 | Female | 1061             | 6842.81     | 155.05               | 86.86        | 76.87  | 97.78  |
|      | Male   | 1038             | 7754.49     | 133.86               | 98.10        | 87.99  | 109.06 |
| 2012 | Female | 1137             | 6895.19     | 164.90               | 98.80        | 87.24  | 111.46 |
|      | Male   | 1097             | 8017.47     | 136.83               | 93.00        | 84.28  | 102.37 |
| 2013 | Female | 1159             | 7269.34     | 159.44               | 97.59        | 86.03  | 110.27 |
|      | Male   | 1205             | 8772.03     | 137.37               | 91.14        | 82.26  | 100.71 |

CI, confidence interval
